Sakaue et al

1 **Tissue-specific enhancer-gene maps from multimodal single-cell data**  
2 **identify causal disease alleles**

3

4 Saori Sakaue<sup>1,2,3</sup>, Kathryn Weinand<sup>1,2,3,4</sup>, Kushal K. Dey<sup>3,5</sup>, Karthik Jagadeesh<sup>3,5</sup>, Masahiro  
5 Kanai<sup>3,6,7,8</sup>, Gerald F. M. Watts<sup>9</sup>, Zhu Zhu<sup>9</sup>, Accelerating Medicines Partnership® RA/SLE  
6 Program and Network, Michael B. Brenner<sup>9</sup>, Andrew McDavid<sup>10</sup>, Laura T. Donlin<sup>11,12</sup>, Kevin  
7 Wei<sup>9</sup>, Alkes L. Price<sup>3,5,13</sup>, Soumya Raychaudhuri<sup>1,2,3,4,14,\*</sup>

- 8 1. Center for Data Sciences, Brigham and Women's Hospital, Harvard Medical School, Boston, MA,  
9 USA
- 10 2. Divisions of Genetics and Rheumatology, Department of Medicine, Brigham and Women's  
11 Hospital, Harvard Medical School, Boston, MA, USA
- 12 3. Program in Medical and Population Genetics, Broad Institute of MIT and Harvard, Cambridge,  
13 MA, USA
- 14 4. Department of Biomedical Informatics, Harvard Medical School, Boston, MA, USA
- 15 5. Department of Epidemiology, Harvard T. H. Chan School of Public Health, Boston, MA, USA
- 16 6. Analytic and Translational Genetics Unit, Massachusetts General Hospital, Boston, MA, USA
- 17 7. Stanley Center for Psychiatric Research, Broad Institute of MIT and Harvard, Cambridge, MA,  
18 USA
- 19 8. Center for Computational and Integrative Biology, Massachusetts General Hospital, Boston, MA,  
20 USA
- 21 9. Division of Rheumatology, Inflammation, and Immunity, Department of Medicine, Brigham and  
22 Women's Hospital and Harvard Medical School, Boston, MA, USA
- 23 10. Department of Biostatistics and Computational Biology, University of Rochester Medical Center,  
24 Rochester, NY, USA
- 25 11. Hospital for Special Surgery, New York, NY, USA
- 26 12. Weill Cornell Medicine, New York, NY, USA
- 27 13. Department of Biostatistics, Harvard T. H. Chan School of Public Health, Boston, MA, USA
- 28 14. Centre for Genetics and Genomics Versus Arthritis, University of Manchester, Manchester, UK

29  
30 \*Address correspondence to:

31 Soumya Raychaudhuri

32 77 Avenue Louis Pasteur, Harvard New Research Building, Suite 250D

33 Boston, MA 02446, USA.

34 [soumya@broadinstitute.org](mailto:soumya@broadinstitute.org)

35 617-525-4484 (tel); 617-525-4488 (fax)

36

Sakaue et al

37 **Abstract**

38 Translating genome-wide association study (GWAS) loci into causal variants and genes  
39 requires accurate cell-type-specific enhancer-gene maps from disease-relevant tissues.  
40 Building enhancer-gene maps is essential but challenging with current experimental methods in  
41 primary human tissues. We developed a new non-parametric statistical method, SCENT  
42 (Single-Cell ENhancer Target gene mapping) which models association between enhancer  
43 chromatin accessibility and gene expression in single-cell multimodal RNA-seq and ATAC-seq  
44 data. We applied SCENT to 9 multimodal datasets including > 120,000 single cells and created  
45 23 cell-type-specific enhancer-gene maps. These maps were highly enriched for causal  
46 variants in eQTLs and GWAS for 1,143 diseases and traits. We identified likely causal genes for  
47 both common and rare diseases. In addition, we were able to link somatic mutation hotspots to  
48 target genes. We demonstrate that application of SCENT to multimodal data from  
49 disease-relevant human tissue enables the scalable construction of accurate cell-type-specific  
50 enhancer-gene maps, essential for defining variant function.

51

Sakaue et al

## 52 **Main**

### 53 **Introduction**

54 Genome-wide association studies (GWAS) have comprehensively mapped loci for human  
55 diseases<sup>1-4</sup>. These loci harbor untapped insights about causal mechanisms that can point to  
56 novel therapeutics<sup>2,5</sup>. However, only rarely are we able to define causal variants or their target  
57 genes. Of the hundreds of associated variants that may be present in a single locus, only one or  
58 a few may be causal; others are associated since they tag causal variants<sup>2,6,7</sup>. Moreover, causal  
59 genes may also be challenging to determine, since causal variants lie in non-coding regions in  
60 90% of the time<sup>8-10</sup>, may regulate distant genes<sup>11-13</sup>, and may employ context-specific  
61 regulatory mechanisms<sup>14-17</sup>.

62 To define causal variants and genes, previous studies have used both statistical and  
63 experimental approaches. Statistical fine-mapping<sup>18-23</sup> can narrow the set of candidate causal  
64 variants, and is more effective when genetic studies include diverse ancestral backgrounds with  
65 different allele frequencies and linkage disequilibrium structures (LD)<sup>24-28</sup>. However, these  
66 approaches alone are seldom able to identify true causal variants with confidence<sup>7,23,29-32</sup>. To  
67 define causal genes, previous studies have built enhancer-gene maps, that can be used to  
68 prioritize causal variants in enhancers and link causal variants to genes they regulate. These  
69 maps often require large-scale epigenetic and transcriptomic atlases (e.g., Roadmap<sup>33</sup>,  
70 BLUEPRINT<sup>34</sup>, and ENCODE<sup>35</sup>). By using these atlases, enhancer-gene maps have been built  
71 by correlating epigenetic activity (i.e., enhancer activity; e.g., histone mark ChIP-seq and bulk  
72 ATAC-seq) with gene expression (e.g., RNA-seq)<sup>36,37</sup>, by combining epigenetic activity and  
73 probability of physical contact with the gene<sup>38,39</sup>, or by integrating multiple linking strategies to

Sakaue et al

74 create composite scores<sup>40</sup>. However, current methods largely use bulk tissues or cell lines.  
75 Bulk data potentially (i) cannot be easily applied to rare cell populations (ii) obscures the  
76 cell-type-specific nature of gene regulation and (iii) requires hundreds of experimentally  
77 characterized samples, necessitating consortium-level efforts. While perturbation experiments  
78 (e.g., CRISPR interference<sup>41</sup> or base editing<sup>42</sup>) can point to causal links between enhancers  
79 and genes, they are difficult to scale because they require the development of cell- or  
80 tissue-type specific experimental protocols<sup>43</sup>.

81 Advances in single-cell technologies offer new opportunities for building cell-type specific  
82 enhancer-gene maps. Multimodal protocols now enable joint capture of epigenetic activity by  
83 ATAC-seq alongside early transcriptional activity with nuclear RNA-seq<sup>44–48</sup>. These methods  
84 are easily applied at scale to cells in human primary tissues without disaggregation, making it  
85 possible to easily query many samples from disease-relevant tissues. Gene-enhancer maps  
86 can be built from this data if links between open chromatin and genes can be accurately  
87 established. Since each observation is at a cell-level resolution, statistical power should exceed  
88 bulk-tissue-based methods. However, the sparse and non-parametric nature of RNA-seq and  
89 ATAC-seq in single-cell experiments makes confident identification of these links challenging.  
90 To date, most methods use linear regression models to link enhancers and genes (e.g.,  
91 ArchR<sup>49</sup> and Signac<sup>50</sup>) despite these sparse and non-parametric features or only utilize  
92 co-accessibility of regulatory regions from ATAC-seq but not gene expression data from  
93 sc-RNA-seq (e.g., Cicero<sup>51</sup>). These previous methods have not widely demonstrated efficacy  
94 in practice for fine-mapping of causal variants and genes in complex traits.

Sakaue et al

95 In this context, we developed Single-Cell Enhancer Target gene mapping (SCENT), to  
96 accurately map enhancer-gene pairs where an enhancer's activity (i.e. peak accessibility) is  
97 associated with gene expression across individual single cells. We use Poisson regression and  
98 non-parametric bootstrapping<sup>52</sup> to account for the sparsity and non-parametric distributions. We  
99 predicted that peaks with gene associations identified by SCENT are more likely to be  
100 functionally important. We apply SCENT to 9 multimodal datasets to build 23 cell-type specific  
101 enhancer-gene maps. We show that SCENT enhancers are highly enriched in statistically  
102 fine-mapped putative causal variants for eQTL and GWAS. We use SCENT enhancer-gene  
103 map to define causal variants, genes, and cell types in common and rare disease loci and  
104 somatic mutation hotspots, which has not been previously demonstrated by conventional  
105 enhancer-gene mapping based on bulk-tissues.

106

## 107 **Results**

### 108 *Overview of SCENT*

109 To identify (1) active *cis*-regulatory regions and (2) their target genes (3) in a given cell type, we  
110 leveraged single-cell multimodal datasets. SCENT accurately identifies significant association  
111 between chromatin accessibility of regulatory regions (i.e., peaks) from ATAC-seq and gene  
112 expression from RNA-seq across individual single cells (**Figure 1a**). Those associations can be  
113 used for prioritizing (1) putative causal variants if they are in regulatory regions that are  
114 associated with expression of a gene, (2) putative causal genes if they are associated with the  
115 identified regulatory region and (3) the critical cell types based on which map the relevant

Sakaue et al

116 association is identified in. We assessed whether binarized chromatin accessibility in each of  
117 the ATAC peaks is associated with expression counts for each gene in *cis* (<500kb from gene  
118 body), testing one peak-gene pair at a time in each cell type (see **Methods**). We tested each  
119 cell type separately to capture cell-type-specific gene regulation and to avoid spurious  
120 peak-gene associations due to gene co-regulation across cell types.

121 Since both RNA-seq and ATAC-seq data are generally sparse<sup>50,53–56</sup>, we used Poisson  
122 regression to model the effect of chromatin accessibility on gene expression accounting for  
123 donor effects and cell-level factors capturing data quality, such as percentage of  
124 mitochondrial reads. However, gene expression counts are highly variable across genes  
125 (**Figure 1b; Supplementary Figure 1a**). Genes that are highly expressed and dispersed might  
126 inflate association test statistics. This inflation was even apparent in data where we permuted  
127 cell barcodes to disrupt any underlying association between ATAC and RNA profiles  
128 (**Supplementary Figure 1b**). Common analytical statistical models (e.g., linear, negative  
129 binomial and Poisson regression) all demonstrated inflated statistics (**Supplementary Figure**  
130 **1c-e**). Therefore, to accurately estimate the error and significance of the effect of each  
131 peak-gene pair, we implemented bootstrapping framework (i.e., resampling cells with  
132 replacement; see **Methods**). This resulted in well-calibrated statistics with appropriate type I  
133 error (**Supplementary Figure 1f**). For each accessible chromatin peak and gene expression in  
134 each cell type, SCENT estimates an effect size, reflecting the strength of the regulatory effect,  
135 and sign, reflecting enhancing versus silencing effects.

Sakaue et al

**a. 9 single-cell multimodal datasets**

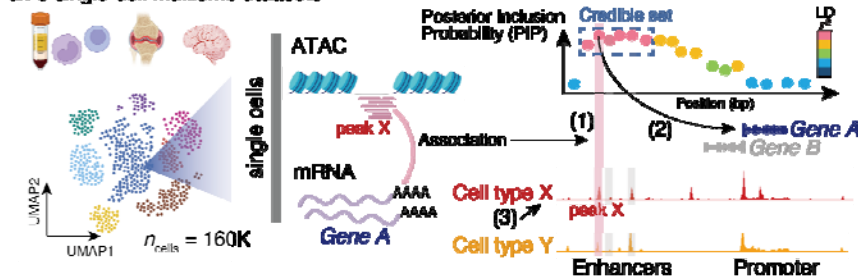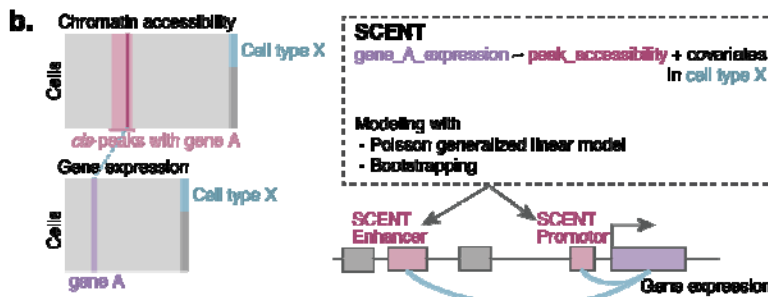

**c. Arthritis-tissue (joint) 10X public data (PBMC) NeurIPS (bone marrow) SHARE-seq (LCL)**

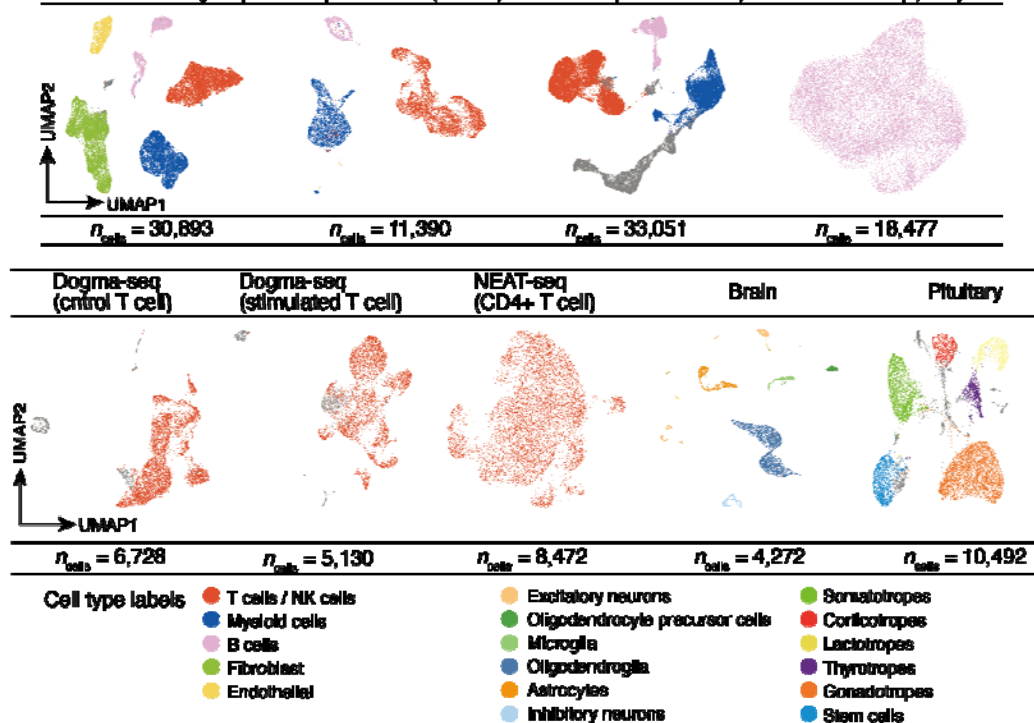

136

137

138

139

140

141

142

143

144

**Figure 1. Schematic overview of SCENT and SCENT enhancer-gene pairs across 9 single-cell multimodal datasets.** a. SCENT identifies (1) active *cis*-regulatory regions and (2) their target genes in (3) a specific cell type. Those SCENT results can be used to define causal variants, genes, and cell types for GWAS loci. b. SCENT models association between chromatin accessibility from ATAC-seq and gene expression from RNA-seq across individual cells in a given cell type. c. 9 single-cell datasets on which we applied SCENT to create 23 cell-type-specific enhancer-gene map. The cells in each dataset are described in UMAP embeddings from RNA-seq and colored by cell types.



Sakaue et al

145 *Discovery of cell-type-specific SCENT enhancer-gene links*

146 We obtained a total of nine single-cell multimodal datasets from diverse human tissues  
147 representing 13 cell-types (immune-related, hematopoietic, neuronal, and pituitary). Since we  
148 are interested in rheumatoid arthritis and other autoimmune diseases, we created a  
149 disease-relevant inflammatory tissue dataset by obtaining inflamed synovial tissues from ten  
150 rheumatoid arthritis (RA) and two osteoarthritis (OA) patients (arthritis-tissue dataset;  $n_{\text{donor}} =$   
151 12). Applying stringent QC to these multimodal data, we obtained information on 30,893 cells  
152 (see **Methods**). In addition, we obtained eight public data sets with 129,672 cells. In total we  
153 had data from 160,565 cells<sup>46,57–61</sup>. We analyzed 16,621 genes and 1,193,842 open chromatin  
154 peaks in *cis* after QC (4,753,521 peak-gene pairs; **Figure 1c, Supplementary Table 1**). After  
155 clustering cells and annotating them with cell labels, we applied SCENT individually to each of  
156 the cell types with  $n_{\text{cells}} > 500$  within each dataset to construct 23 enhancer-gene maps. SCENT  
157 identified 87,648 cell-type-specific peak-gene links (false discovery rate (FDR) < 10%, **Figure**  
158 **2a, Supplementary Figure 2**). Each gene had variable number of associated peaks in *cis*  
159 (from 0 to 97, mean = 4.13, **Supplementary Figure 3a**).

160 To assess replicability of SCENT peak-gene links across datasets, we used  
161 arthritis-tissue dataset, which had the largest number of significant peak-gene pairs as a  
162 stringent discovery dataset. We compared the effects from the arthritis-tissue dataset in the  
163 same cell-type with those from other datasets (B cell, T/NK cell and myeloid cell;  
164 **Supplementary Table 2a**; see **Methods**). Despite different tissue contexts, we confirmed high  
165 directional concordance of the effect of chromatin accessibility on gene expression for



Sakaue et al

166 peak-gene pairs significant in both datasets (mean Pearson  $r = 0.62$  of effect sizes, 99% mean  
167 concordance across all the datasets: **Supplementary Figure 3b**). For comparison, we tested  
168 two popular linear parametric single-cell multimodal methods, ArchR<sup>56</sup> or Signac<sup>50</sup>. When  
169 comparing with the same discovery and replication data (i.e., arthritis-tissue dataset as a  
170 discovery and public PBMC as a replication), we noted lower directional concordance and effect  
171 correlation in these previous methods than in SCENT (55)(mean Pearson's  $r = 0.31$ , 62% mean  
172 directional concordance in ArchR and  $r = 0.24$ , 98% mean directional concordance in Signac;  
173 **Supplementary Table 2b** and **c**). These results argue that SCENT can more reproducibly  
174 detect enhancer-gene links compared with previous parametric methods for single-cell  
175 multimodal data.  
176

Sakaue et al

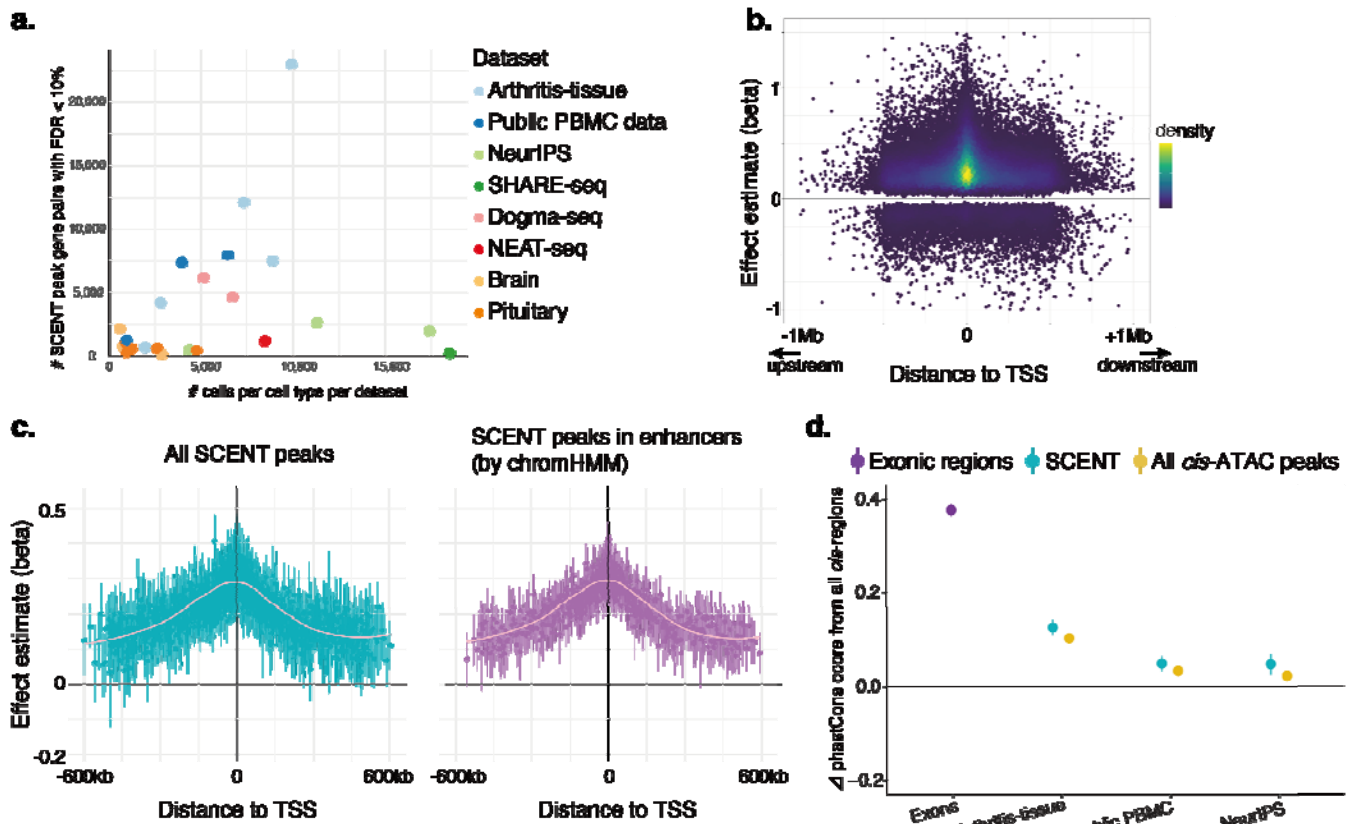

177

178

179

180

181

182

183

184

185

186

187

188

189

190

191

192

**Figure 2. SCENT identified functionally active and evolutionary conserved *cis*-regulatory regions from single-cell multimodal data.**

**a.** The number of significant gene-peak pairs discovered by SCENT with FDR < 10%. Each dot represents the number of significant gene-peak pairs in a given cell type in a dataset (y-axis) as a function of the number of cells in each cell type in a dataset (x-axis), colored by the dataset. **b.** The effect size (beta) of chromatin accessibility on the gene expression from Poisson regression (y-axis). Each dot is a significant gene-peak pair and plotted against the distance between the peak and the transcription start site (TSS) of the gene, colored as a density plot. **c.** The mean effect size (beta) of chromatin accessibility on the gene expression in arthritis-tissue dataset within each bin of TSS distance. Left; all significant gene-peak links. Right; SCENT peaks within enhancers identified using chromHMM in immune-related tissues. **d.** Mean phastCons score difference ( phastCons score) between each annotated region and all *cis*-regulatory non-coding regions. We show the phastCons score for exonic regions (purple) as a reference, and for SCENT (green) and all *cis*-ATAC peaks (yellow) enhancers in each multimodal dataset.

Sakaue et al

193 To assess if peaks (i.e., *cis*-regulatory regions) identified through SCENT were functional,  
194 we examined if (1) they co-localized with conventional *cis*-regulatory annotation, (2) the effect of  
195 peaks on expression was greater for closer peak-gene pairs, (3) SCENT peaks had high  
196 sequence conservation, and (4) peak-gene connections were more likely to be validated  
197 experimentally.

198 First, we tested how many of the SCENT peaks overlapped with an ENCODE cCRE<sup>62</sup>, a  
199 conventional *cis*-regulatory annotation defined by bulk-based epigenomic datasets. We  
200 observed that 98.0% of the SCENT peaks overlapped with ENCODE cCRE on average,  
201 compared to 23.3% of random *cis*-regions matched for size and 89.0% of non-SCENT peaks  
202 (**Supplementary Figure 3c**).

203 Second, we examined the strength and direction of enhance-gene links, hypothesizing  
204 that stronger links would be more proximal to the transcription start site (TSS) of target genes.  
205 We observed that the regression coefficient  $\beta_{peak}$  (the effect size of peak accessibility on gene  
206 expression) becomes larger and more positive as the SCENT *cis*-regulatory elements (peaks)  
207 get closer to the TSS (**Figure 2b** and **Figure 2c**, left panel), consistent with previous  
208 observations<sup>56,63</sup>. We annotated *cis*-regulatory regions identified by SCENT with 18-state  
209 chromHMM results from 41 immune-related samples in ENCODE consortium<sup>37</sup>. When we  
210 subset peaks to those within enhancer annotations, we observed a clearer decay in effect size  
211 as a function of TSS distance (**Figure 2c**, right panel).

212 Third, we assessed whether SCENT peaks had higher sequence conservation across  
213 species. We reasoned that SCENT captures functionally important and thus evolutionary

Sakaue et al

214 conserved regions. The evolutionary conserved regulatory regions are known to be enriched for  
215 complex trait heritability<sup>64</sup>. We used evolutionary conservation metric, phastCons<sup>65</sup> to assess  
216 sequence conservation at SCENT peaks. As expected, exonic regions were much more  
217 evolutionary conserved than all non-coding *cis*-region (mean  $\Delta$  phastCons score = 0.38, paired  
218 t-test  $P < 10^{-323}$ ; **Figure 2d**, purple). The SCENT regulatory regions were also conserved  
219 relative to non-coding *cis*-regions (mean  $\Delta$  phastCons score = 0.13, paired t-test  $P = 4.2 \times 10^{-42}$   
220 in arthritis-tissue dataset; **Figure 2d**, green). In contrast, the  $\Delta$  phastCons score between all  
221 *cis*-ATAC peaks and all non-coding *cis*-region was more modest (mean  $\Delta$  phastCons score =  
222 0.092, paired t-test  $P = 8.7 \times 10^{-27}$  in arthritis-tissue dataset; **Figure 2d**, yellow). To test if the  
223 higher conservation in SCENT peaks were driven by their proximity to TSS, we assessed  $\Delta$   
224 phastCons score between SCENT peaks and non-SCENT peaks with matching peaks on TSS  
225 distance. SCENT peaks had significantly higher conservation scores than the non-SCENT  
226 peaks when we matched on TSS distance (mean  $\Delta$  phastCons score = 0.034,  $P = 4.7 \times 10^{-4}$  in  
227 arthritis-tissue dataset; **Supplementary Figure 3d**; see **Methods**). The higher sequence  
228 conservation suggested the functional importance of SCENT regulatory regions not solely  
229 driven by TSS proximity.

230 Finally, we tested whether the target genes from SCENT were enriched for  
231 experimentally confirmed enhancer-gene links. We used Nasser et al.<sup>39</sup> CRISPR-Flow FISH  
232 results which included 278 positive enhancer-gene connections where perturbation decreased  
233 connections, and 5,470 negative connections. We observed that the SCENT peaks were >  
234 4-fold enriched relative to non-SCENT peaks for positive connections (4.5X, Fisher's exact

Sakaue et al

235  $P=1.8 \times 10^{-9}$ , arthritis-tissue dataset and 4.5X,  $P=1.0 \times 10^{-8}$  in public PBMC dataset; **Methods,**  
236 **Supplementary Table 3).**

237 We anticipate that the genes with the largest number of SCENT peaks are likely to be  
238 the most constraint and least tolerant to loss of function mutations. The genes with the most  
239 SCENT peaks per gene included *FOSB* ( $n = 97$ ), *JUNB* ( $n = 95$ ), and *RUNX1* ( $n = 77$ ), critical  
240 and highly conserved transcription factors. We used mutational constraint metrics based on the  
241 absence of deleterious variants within human populations (i.e., the probability of being  
242 loss-of-function intolerant (pLI)<sup>66</sup> and the loss-of-function observed/expected upper bound  
243 fraction (LOEUF)<sup>67</sup>). We observed that the normalized number of SCENT *cis*-regulatory  
244 elements per gene is strongly associated with mean constraint score for the gene (beta = 0.37,  
245  $P = 4.9 \times 10^{-90}$  for pLI where higher score indicates more constraint, and beta = -0.35,  $P =$   
246  $-0.35 \times 10^{-106}$  for LOEUF where lower score indicates more constraint; **Supplementary Figure**  
247 **4a** and **4b**, respectively). Previous results have shown that genes with many regulatory regions  
248 based on bulk-epigenomic data had been enriched for loss-of-function intolerant genes<sup>68</sup>. We  
249 were able to replicate the same trend by using the single-cell multimodal datasets and SCENT.

250  
251 *Enrichment of eQTL putative causal variants in SCENT peaks*

252 We sought to examine whether the SCENT peaks are likely to harbor statistically fine-mapped  
253 putative causal variants for expression quantitative loci (eQTL). We analyzed tissue-specific  
254 eQTL fine-mapping results from GTEx consortium across 49 tissues<sup>69</sup>. We used statistical  
255 fine-mapping results (posterior inclusion probability [PIP] > 0.2) to define putative causal

Sakaue et al

256 variants. We then tested enrichment statistics within ATAC peaks or SCENT peaks (see  
257 **Methods**). Unsurprisingly, all the accessible regions defined by ATAC-seq in *cis*-regions were  
258 modestly enriched in fine-mapped variants by 2.7X (yellow, **Figure 3a**). However, SCENT  
259 peaks were more strikingly enriched in fine-mapped variants by 9.6X on average across all  
260 datasets (green, **Figure 3a**). Using more stringent PIP threshold cutoffs (0.5 and 0.7) to define  
261 putative causal variants resulted in even stronger enrichments (**Supplementary Figure 5**).

262         Since many SCENT peaks are close to TSS regions, we considered whether this  
263 enrichment might be driven by TSS proximity (**Figure 2c**, **Supplementary Figure 6a**). To test  
264 this, we matched each of the SCENT peak-gene pairs to one non-SCENT peak-gene pair that  
265 had the most similar TSS distance (**Supplementary Figure 6b**). We compared the  
266 fine-mapped variant enrichment between those two sets of peak-gene pairs with matched TSS  
267 distance. We observed that SCENT peaks consistently had higher enrichment in all analyzed  
268 datasets (**Supplementary Figure 6c**) than TSS-distance-matched non-SCENT peaks (e.g.,  
269 12.3X in SCENT vs. 9.64X in distance-matched non-SCENT in arthritis-tissue dataset). This  
270 suggests that SCENT has additional information in identifying biologically important  
271 *cis*-regulatory regions beyond TSS distance.

Sakaue et al

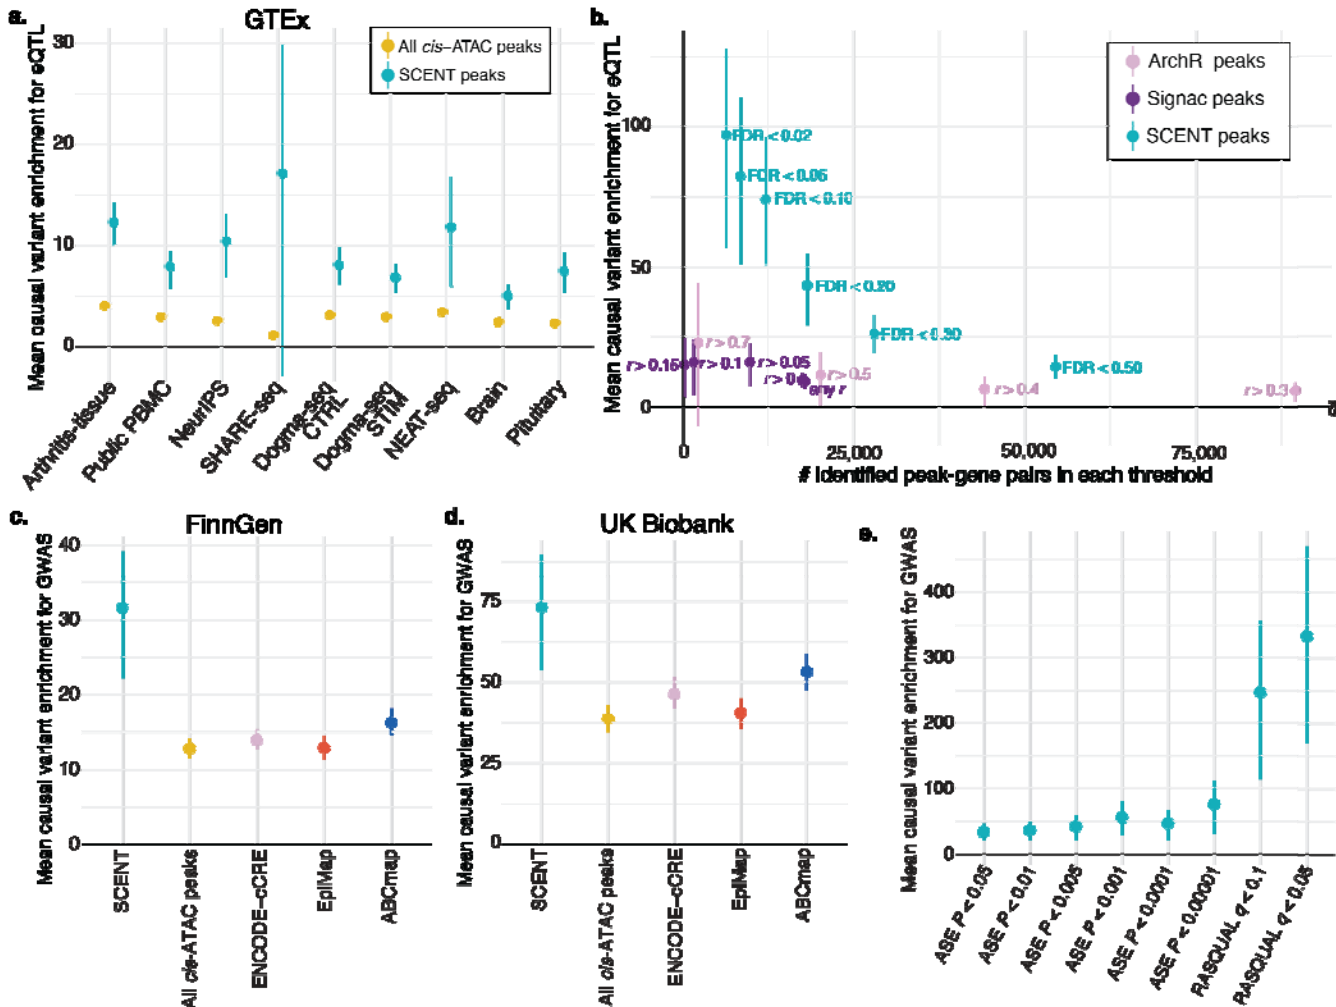

272  
273  
274  
275  
276  
277  
278  
279  
280  
281  
282  
283  
284  
285  
286

**Figure 3. SCENT enhancers are enriched in causal variants of eQTL and GWAS.**

**a.** The mean causal variant enrichment for eQTL within SCENT peaks or all ATAC-seq peaks in each of the 9 single-cell datasets. The bars indicate 95% confidence intervals by bootstrapping genes. **b.** Comparison of the mean causal variant enrichment for eQTL (y-axis) between SCENT (green), ArchR (pink), and Signac (purple) as a function of the number of significant peak-gene pairs at each threshold of significance. The bars indicate 95% confidence intervals by bootstrapping genes. The ArchR results with > 100,000 peak-gene linkages are omitted, and full results are in **Supplementary Figure 6d**. **c** and **d.** The mean causal variant enrichment for GWAS within SCENT enhancers (green), all cis-ATAC peaks (yellow), ENCODE cCREs (pink), EpiMap enhancers across all groups (red) and ABC enhancers across all samples (blue). GWAS results were based on FinnGen (**c**) and UK Biobank (**d**). The bars indicate 95% confidence intervals by bootstrapping traits. **e.** The mean causal variant enrichment for FinnGen GWAS within intersection of SCENT enhancers and caQTL enhancers at each threshold of significance. The bars indicate 95% confidence intervals by bootstrapping traits.



Sakaue et al

287 We next compared the enrichment for eQTL causal variants in SCENT peaks to peaks  
288 identified by linear parametric methods, ArchR<sup>56</sup> and Signac<sup>50</sup> using myeloid cells in the  
289 arthritis-tissue dataset. ArchR and Signac peaks had substantially lower causal variant  
290 enrichment for eQTL in blood (1.4X and 9.3X, respectively) compared to SCENT peaks (74.1X)  
291 in arthritis-tissue dataset. By varying the thresholds to define significant peak-gene associations  
292 (correlation  $r$  in ArchR and FDR in SCENT), we assessed the number of peak-gene pairs and  
293 the causal variant enrichment for eQTLs within these peaks (**Figure 3b** and **Supplementary**  
294 **Figure 6d**). Indeed, SCENT peaks consistently demonstrated higher causal variant enrichment  
295 than ArchR peaks and Signac peaks.

296 SCENT can detect *cis*-regulatory regions in a cell-type-specific manner. We created  
297 cell-type-specific enhancer-gene maps in four major cell types with > 5,000 cells across  
298 datasets; for each cell type we took the union of per-cell-type SCENT enhancers across all  
299 datasets. We observed that the cell-type-specific SCENT enhancers (e.g., SCENT B cell  
300 peaks) were most enriched in putative causal eQTL variants within relevant samples in GTEx  
301 (e.g., EBV-transformed lymphocytes; **Supplementary Figure 6e**).

302 These results suggest that SCENT can prioritize regulatory elements harboring putative  
303 causal eQTL variants in a cell-type-specific manner, with higher precision than the previous  
304 single-cell based method.

305  
306 *Enrichment of GWAS causal variants in SCENT enhancers*

Sakaue et al

307 Given that the combination of SCENT and multimodal data from disease-relevant tissues can  
308 be used to quickly build disease-specific enhancer-gene maps, we sought to examine whether  
309 SCENT peaks can be used for the more difficult task of prioritizing disease causal variants. To  
310 identify candidate causal variants ( $PIP > 0.2$ ), we used fine-mapping results from complex trait  
311 loci from GWAS in two large-scale biobanks (FinnGen<sup>70</sup> [1,046 disease traits] and UK  
312 Biobank<sup>71</sup> [35 binary traits and 59 quantitative traits])<sup>28</sup>. We defined enrichment statistics for  
313 GWAS causal variants within SCENT enhancers (see **Methods**). The SCENT enhancers were  
314 strikingly enriched in causal GWAS variants in FinnGen (31.6X on average; 1046 traits; **Figure**  
315 **3c** and **Supplementary Figure 7a**) and UK Biobank (73.2X on average; 94 traits; **Figure 3d**  
316 and **Supplementary Figure 7b**). This enrichment was again much larger than all *cis*-ATAC  
317 peaks (12.8X in FinnGen and 38.8X in UK Biobank). Moreover, the target genes of causal  
318 variants for autoimmune diseases (AID) identified by SCENT enhancer-gene map in  
319 immune-related cell types had higher fraction (10.8%) of known genes implicated in Mendelian  
320 disorders of immune dysregulation ( $n_{\text{gene}} = 550$ )<sup>72,73</sup> than SCENT enhancer-gene map in  
321 fibroblast (3.8%; **Supplementary Figure 7c**).

322 We compared SCENT to other alternative genome annotations and enhancer-gene  
323 maps that have recently emerged. Causal variant enrichment in SCENT was much higher than  
324 the conventional bulk-based annotations such as ENCODE cCREs (13.9X in FinnGen and  
325 46.5X in UK Biobank), ABC (16.3X in FinnGen and 53.3X in UK Biobank) and EpiMap, (12.9X  
326 in FinnGen and 40.6X in UK Biobank; **Figure 3c** and **3d**, **Supplementary Figure 7a** and **b**).

327 We varied thresholds to assess recall and precision tradeoffs (FDR in SCENT, ABC score in

Sakaue et al

328 ABC model and EpiMap correlation score in EpiMap) for identifying causal GWAS variants  
329 (**Supplementary Figure 8a**). We constructed SCENT from 9 datasets with only 28 samples,  
330 substantially less than the 833 samples used to construct EpiMap and 131 samples for the ABC  
331 model. Despite this, SCENT peaks consistently demonstrated higher enrichment of causal  
332 GWAS variants at a similar number of identified peak-gene linkages than ABC model and  
333 EpiMap. A more stringent PIP threshold (0.5 and 0.7) to define putative causal variants further  
334 increased the enrichment statistics while maintaining the higher enrichment in SCENT than bulk  
335 methods (**Supplementary Figure 8b**). We tested whether causal genes are being identified by  
336 examining a set of known genes implicated in Mendelian disorders of immune dysregulation.  
337 We observed that the target genes for AID identified by SCENT enhancer-gene map in  
338 immune-related cell types had higher fraction (10.8%) of implicated known Mendelian genes  
339 <sup>72,73</sup> than EpiMap (8.6%) and ABC model (4.4%) enhancer-gene map (**Supplementary Figure**  
340 **7c**). These results demonstrate the power SCENT achieved by accurately modeling association  
341 between chromatin accessibility and gene expression at the single-cell resolution.

342 We hypothesized that disease-causal variants prioritized by SCENT would likely  
343 modulate chromatin accessibility (e.g., transcription factor binding affinity). If so, the intersection  
344 of the SCENT enhancers and chromatin accessibility quantitative trait loci (caQTL) could further  
345 enrich the causal GWAS variants<sup>74-77</sup>. To test this hypothesis, we used single-cell ATAC-seq  
346 samples with genotype ( $n_{\text{donor}} = 17$ ; arthritis-tissue dataset) from the same tissue and performed  
347 caQTL mapping by leveraging allele-specific (AS) chromatin accessibility (binomial test  
348 followed by meta-analysis across donors) or by combining AS with inter-individual differences

Sakaue et al

349 (RASQUAL<sup>78</sup>; see **Methods**). We then defined caQTL ATAC peaks with variable thresholds  
350 and intersected them with the SCENT enhancers. We calculated the causal GWAS variant  
351 enrichment within these intersected regions. We observed drastically higher enrichment of  
352 causal variants as we used more stringent threshold in defining caQTL peaks, reaching as high  
353 as 333-fold enrichment (**Figure 3e**). This suggested that SCENT efficiently prioritized causal  
354 GWAS variants in part by capturing regulatory regions of which chromatin accessibility is  
355 perturbed by genetic variants and modulates gene expression. SCENT demonstrated a  
356 potential to further enrich causal variants by using caQTLs if the multimodal data has matched  
357 genotype data.

358

### 359 *Defining mechanisms of GWAS loci by SCENT*

360 We finally sought to use SCENT enhancer-gene links to define causal mechanisms of complex  
361 trait GWAS. We used the fine-mapped variants from GWASs (FinnGen, UK Biobank traits and  
362 GWAS fine-mapping results of rheumatoid arthritis (RA)<sup>26</sup>, inflammatory bowel disease<sup>29</sup> and  
363 type 1 diabetes (T1D)<sup>79</sup>). SCENT linked 4,124 putative causal variants (PIP > 0.1) to their  
364 potential target genes across 1,143 traits in total (**Supplementary Table 4**).

365 We first focus on autoimmune loci, given that our current SCENT tracks are largely  
366 derived from immune cell types and inflammatory tissues. We prioritized a single well  
367 fine-mapped variant rs72928038 (PIP > 0.3) at 6q15 locus in multiple autoimmune diseases  
368 (RA, T1D, atopic dermatitis and hypothyroidism), within the T-cell-specific SCENT enhancer (T  
369 cells in Public PBMC datasets and Dogma-seq control and stimulated T cells; **Figure 4a**). This

Sakaue et al

370 enhancer was linked to *BACH2*, which was also the closest gene to this fine-mapped variant.

371 Notably, base-editing in T cells has confirmed that this variant affects *BACH2* expression<sup>80</sup>.

372 Moreover, editing of this variant into CD8 T cells skewed naive T cells toward effector T cell

373 fates<sup>80</sup>.

374

Sakaue et al

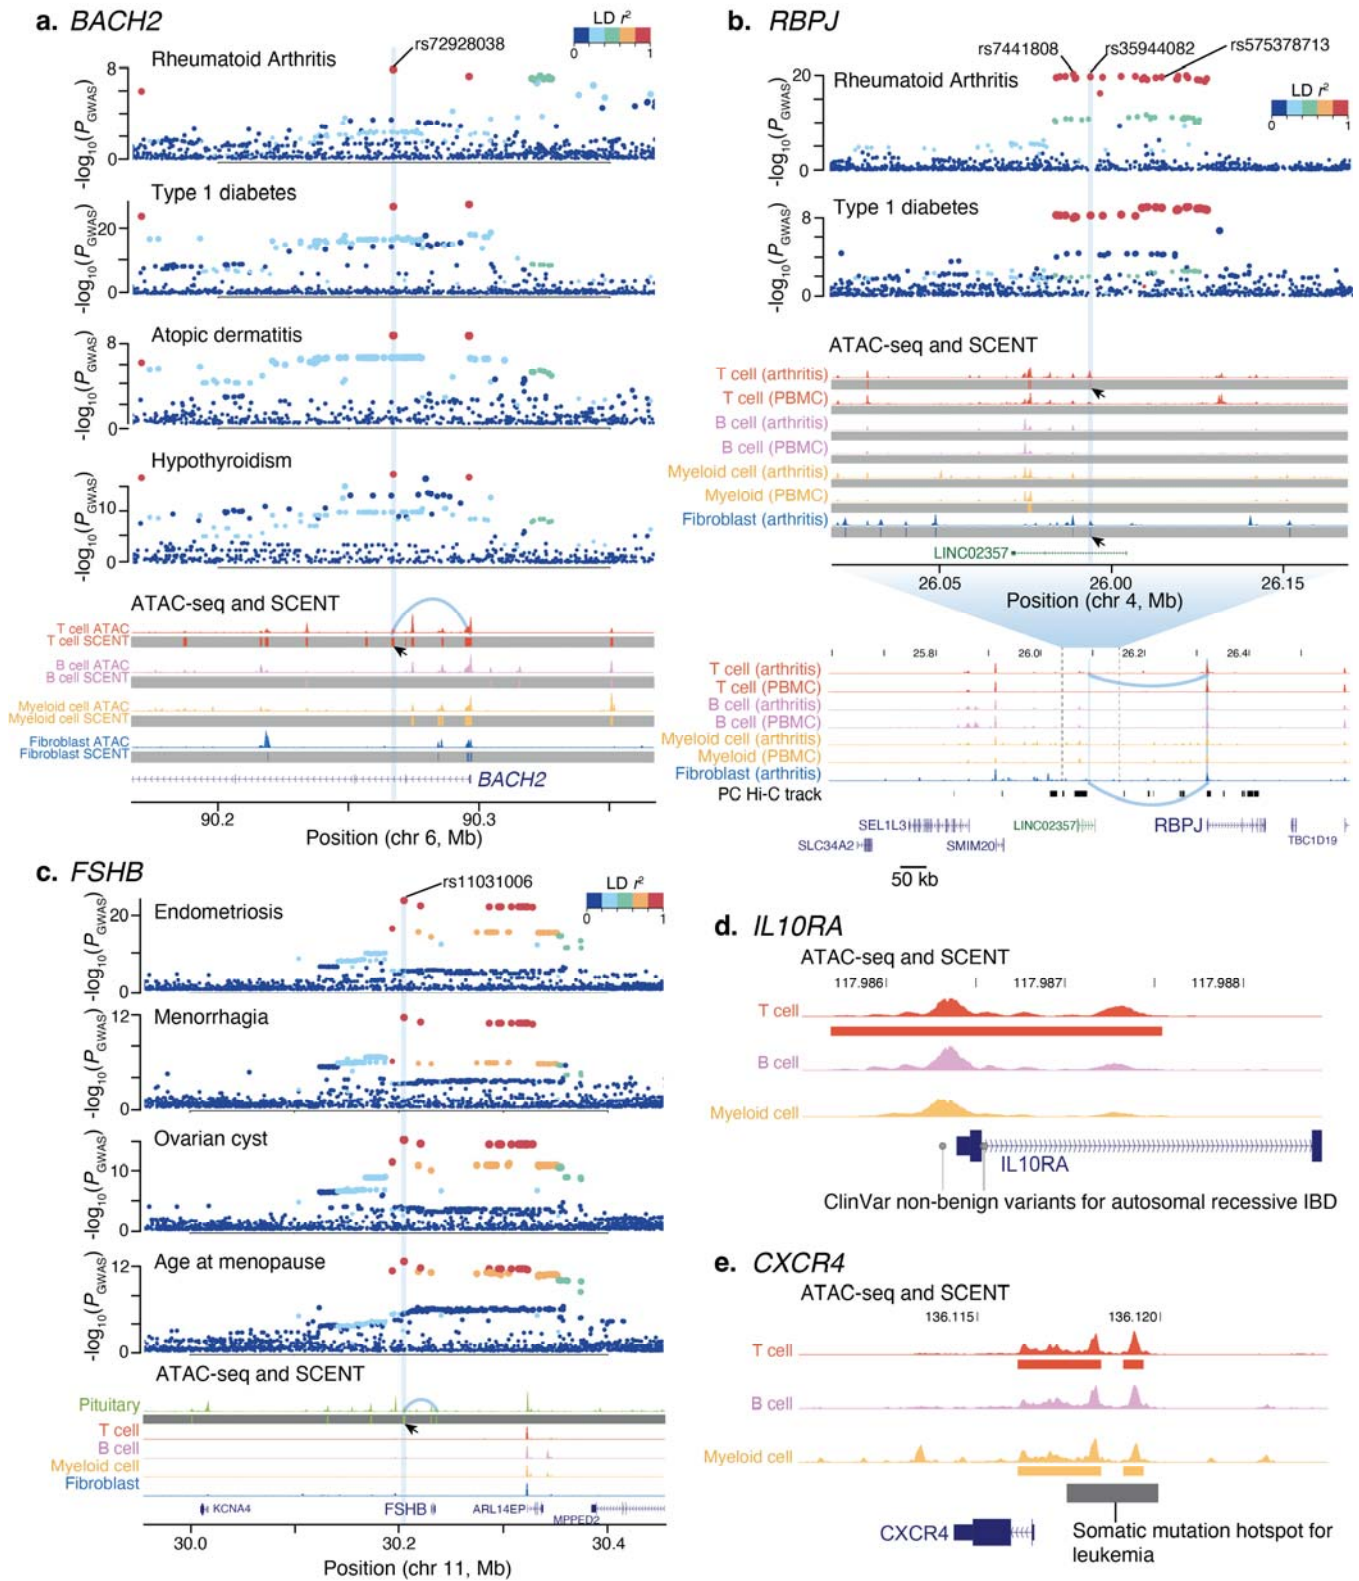

375

376

377

378

**Figure 4. SCENT defined causal variants and genes in complex trait GWAS.**

**a.** Rs72928038 at *BACH2* locus was prioritized by T-cell-specific SCENT enhancer-gene map, being for RA, T1D, Atopic dermatitis and hypothyroidism. The top four panels are GWAS



Sakaue et al

379 regional plots, with x-axis representing the position of each genetic variant. The color of the dots  
380 represent LD  $r^2$  from the prioritized variant (highlighted by light blue stripe). ATAC-seq and  
381 SCENT tracks represent aggregated ATAC-seq tracks (top) and SCENT peaks (bottom with  
382 grey stripes) in each cell type (public PBMC dataset for immune cell types and arthritis-tissue  
383 dataset for fibroblast). An arrow head indicates the SCENT peak overlapping with fine-mapped  
384 variant. **b.** Rs35944082 for RA and T1D was prioritized and connected to *RBPJ* by long-range  
385 interaction from T-cell- and fibroblast- SCENT enhancer-gene map using inflamed synovium in  
386 arthritis-tissue dataset. The top two panels are GWAS regional plots similarly to panel **a.**  
387 ATAC-seq and SCENT tracks are shown similarly to panel **a**, but using both public PBMC and  
388 arthritis-tissue datasets. **c.** Rs11031006 was prioritized and connected to *FSHB* for multiple  
389 gynecological traits by using pituitary-derived single-cell multimodal dataset. The top four  
390 panels are GWAS regional plots similarly to panel **a.** ATAC-seq and SCENT tracks are shown  
391 similarly to panel **a**, and include tracks from pituitary dataset. There were no SCENT peaks in  
392 cell types except for pituitary. **d.** ATAC-seq and SCENT tracks for *IL10RA* locus, where  
393 non-coding ClinVar variants (grey dots) colocalized with T-cell SCENT track. **e.** ATAC-seq and  
394 SCENT tracks for *CXCR4* locus, where somatic mutation hotspot for leukemia colocalized with  
395 T-cell and myeloid-cell SCENT tracks.



Sakaue et al

396 Another locus for RA and T1D at chr 4p15.2 harbored 21 candidate variants, each with  
397 low PIPs (< 0.14). SCENT prioritized a single variant rs35944082 in T cells and fibroblasts only  
398 within the arthritis-tissue dataset from inflamed synovial tissue (**Figure 4b**). SCENT linked this  
399 variant to *RBPJ*, which was the 3rd closest gene to this variant located 235kb away. This  
400 variant-gene link was supported by a physical contact from promotor-capture Hi-C contact data  
401 measured in hematopoietic cells<sup>81</sup>. *RBPJ* (recombination signal binding protein for  
402 immunoglobulin kappa J region) is a transcription factor critical for NOTCH signaling, which has  
403 been implicated in RA tissue inflammation through functional studies<sup>82,83</sup>. *Rbpj* knockdown in  
404 mice resulted in abnormal T cell differentiation and disrupted regulatory T cell phenotype<sup>84,85</sup>,  
405 consistent with a plausible role gene in autoimmune diseases. Intriguingly, we observed no  
406 SCENT peaks in T cells from PBMC or blood to prioritize causal variants at this locus. This  
407 linkage was not present in EpiMap. ABC map prioritized another variant, rs7441808 at this  
408 locus and linked it non-specifically to 16 genes including *RBPJ*, making it difficult to define the  
409 true causal gene.

410 In a final example, we highlight the value of using SCENT to build enhancer-gene maps  
411 from disease-critical tissues. We examined the enhancer-gene map produced from single-cell  
412 multimodal pituitary data<sup>61</sup> to assess the 11p14.1 locus for multiple gynecological traits  
413 (endometriosis, menorrhagia, ovarian cyst and age at menopause). Our map connected  
414 rs11031006 to *FSHB* (follicle stimulating hormone subunit beta) (**Figure 4c**), which is  
415 specifically expressed in the pituitary<sup>69,86</sup> and enables ovarian folliculogenesis to the antral  
416 follicle stage<sup>87</sup>. Rare genetic variants within *FSHB* are known to cause autosomal recessive

Sakaue et al

417 hypogonadotropic hypogonadism<sup>88</sup>. However, the other multimodal datasets and bulk-based  
418 methods (ABC model and EpiMap) were unable to prioritize and connect this variant to *FSHB*.  
419 *FSHB* example showed the potential of SCENT for defining causal variants and genes by being  
420 applied to disease-relevant tissues.

421

422 *Mendelian-disease variants and somatic mutations in cancer within SCENT enhancers*

423 Having established the SCENT's utility in defining causal variants and genes in complex  
424 diseases, we examined rare non-coding genetic variants causing Mendelian diseases.  
425 Currently, causal mutations and genes can only be identified in ~30–40% of patients with  
426 Mendelian diseases<sup>89–91</sup>. Consequently, many variants identified in case individuals are  
427 annotated as variants of uncertain significance (VUS). The VUS annotation is especially  
428 challenging for non-coding variants. We asked whether our SCENT enhancers overlapped with  
429 clinically reported non-benign non-coding variants by ClinVar<sup>92</sup> (400,300 variants in total). The  
430 SCENT enhancers harbored 2.0 times ClinVar variants on average than all the ATAC regions  
431 with the same genomic length across all the datasets we investigated (**Supplementary Figure**  
432 **9**). This density of ClinVar variants was 3.2 times and 12 times on average larger than that in  
433 ENCODE cCREs and of all non-coding regions, respectively. We thus defined 3,724 target  
434 genes for 33,618 non-coding ClinVar variants by SCENT in total (**Supplementary Table 5**). As  
435 illustrative examples, we found 40 non-coding variants linked to *LDLR* gene causing familial  
436 hypercholesterolemia<sup>192</sup>, 3 non-coding variants linked to *IL10RA* causing autosomal recessive

Sakaue et al

437 early-onset inflammatory bowel disease 28 (**Figure 4d**)<sup>93</sup>, and an intronic variant rs1591491477  
438 linked to *ATM* gene causing hereditary cancer-predisposing syndrome<sup>92</sup>.

439 Finally, we used SCENT to connect non-coding somatic mutation hotspots to target  
440 genes. Recently, somatic mutation analyses across the entire cancer genome revealed  
441 possible driver non-coding events<sup>94</sup>. Among 372 non-coding somatic hotspots in 19 cancer  
442 types, SCENT enhancers included 193 cancer-mutation hotspot pairs (**Supplementary Table**  
443 **6**). SCENT enhancer-gene linkage successfully linked those hotspots to known driver genes  
444 (e.g., *BACH2*, *BCL6*, *BCR*, *CXCR4* (**Figure 4e**), and *IRF8* in leukemia). In some instances,  
445 SCENT nominated different target genes for those mutation hotspots from those based on ABC  
446 model used in the original study. For example, SCENT connected a somatic mutation hotspot in  
447 leukemia at chr14:105568663-106851785 to *IGHA1* (Immunoglobulin Heavy Constant Alpha 1)  
448 which might be more biologically relevant than *ADAM6* nominated by ABC model. These results  
449 implicate broad applicability of SCENT for annotating all types of human variations in  
450 non-coding regions.

451  
452 *Augmenting SCENT enhancer-gene maps with more samples*

453 While the recall for enhancer-gene maps defined by SCENT was lower than that by  
454 bulk-tissue-based methods, we felt that this might be a function of current limited sample sizes.  
455 We wanted to assess if the addition of more cells into SCENT might lead to the higher recall for  
456 enhancer-gene maps while retaining the precision. To assess this, we downsampled our  
457 multimodal single cell dataset. We observed that the number of significant gene-peak pairs

Sakaue et al

458 increased linearly to the number of cells per cell type in a given dataset, suggesting that SCENT  
459 will be even better powered as the size of sc-multimodal datasets increases (**Supplementary**  
460 **Figure 10**). We considered the possibility that enhancer-gene maps with greater numbers of  
461 cells might capture spurious associations; if this was the case, we would expect more  
462 long-range associations, which are more likely to be false positives with greater cell numbers. In  
463 contrast, we observed that shorter-range and longer-range associations were both equivalently  
464 represented as we added additional cells, suggesting the robustness of our discovery.

465

466

## 467 **Discussion**

468 In this study, we presented a novel statistical method, SCENT, to create a cell-type-specific  
469 enhancer-gene map by using single-cell multimodal data. Single-cell RNA-seq and ATAC-seq  
470 are both sparse and have variable count distributions, which requires non-parametric  
471 bootstrapping to connect chromatin accessibility with gene expression. The SCENT model  
472 demonstrated well-controlled type I error, outperforming commonly used statistical models  
473 which showed inflated statistics. SCENT mapped enhancers that showed strikingly high  
474 enrichment for putative causal variants in eQTLs and GWASs and outperformed previous  
475 methods analyzing single-cell multimodal data (e.g., ArchR<sup>49</sup> and Signac<sup>50</sup>). Despite using  
476 substantially lower number of samples (28 from 9 datasets in total), enhancers defined by  
477 SCENT had equivalent or even higher enrichment for causal variants than bulk-tissue-based

Sakaue et al

478 methods with more than 100 samples (e.g., EpiMap and ABC model), by modeling single-cell  
479 level observations instead of obscuring them into sample-level association.

480 As potential limitations, first, our enhancer-gene maps had relatively fewer enhancers  
481 identified compared to other resources (**Figure 2a**). However, downsampling experiments  
482 showed a clear linear relationship between the number of cells per cell type per dataset and the  
483 number of significant SCENT peak-gene links. It follows that SCENT applied to larger datasets  
484 from a diverse set of tissues will further expand the current enhancer-gene map. In contrast,  
485 bulk-tissue-based enhancer-gene map might have an upper limit of discovery by the number of  
486 samples generated by each consortium (e.g., ENCODE). Second, SCENT focuses on gene  
487 cis-regulatory mechanisms to fine-map disease causal alleles, while there could be other  
488 causal mechanisms that explain disease heritability, such as alleles that act through  
489 trans-regulatory effects, splicing effects, or post-transcriptional effects<sup>95</sup>.

490 We argue that the real utility of SCENT is that it enables the rapid construction of  
491 disease-tissue-relevant enhancer-gene maps. Multimodal single cell data can be easily  
492 obtained from a wide range of primary human tissues. Since these assays query nuclear  
493 material, data can be obtained without disaggregating tissues. Hence, the data is likely robust  
494 to the effects of disaggregation which is employed for assays that need intact cells from tissue.  
495 Therefore, it is possible to build relevant tissue-specific enhancer-gene maps that are  
496 necessary to understand the causal mechanisms of common diseases from GWAS, rare  
497 diseases from mapping Mendelian diseases, and somatic non-coding mutations in cancers. For

Sakaue et al

498 example, understanding the *FSHB* locus in gynecological traits specifically required a pituitary  
499 map, and *RBPJ* locus in RA specifically required a synovial tissue map.

500 In summary, our method SCENT is a robust, versatile method to efficiently define causal  
501 variants and genes in human diseases and will fill the gap in the current enhancer-gene map  
502 built from genomic data in bulk tissues.

503

#### 504 **Data Availability**

505 The publicly available datasets were downloaded via Gene Expression Omnibus (accession  
506 codes: GSE140203, GSE156478, GSE178707, GSE193240, GSE178453) or web repository  
507 (<https://www.10xgenomics.com/resources/datasets?query=&page=1&configure%5Bfacets%5D%5B0%5D=chemistryVersionAndThroughput&configure%5Bfacets%5D%5B1%5D=pipeline.version&configure%5BhitsPerPage%5D=500&menu%5Bproducts.name%5D=Single%20Cell%20Multiome%20ATAC%20%2B%20Gene%20Expression,>  
508 [https://openproblems.bio/neurips\\_docs/data/dataset/](https://openproblems.bio/neurips_docs/data/dataset/)). The raw data for arthritis-tissue dataset  
509 (single-cell multimodal RNA/ATAC-seq and single-cell ATAC-seq) will be publicly available  
510 before the acceptance of this manuscript.

514

#### 515 **Code Availability**

516 The computational scripts related to this manuscript are available at  
517 <https://github.com/immunogenomics/SCENT>.

518

Sakaue et al

519 **Methods**

520 *Data and sample in arthritis-tissue dataset*

521 This study was performed in accordance with protocols approved by the Brigham and Women's  
522 Hospital and the Hospital for Special Surgery institutional review boards. Synovial tissue from  
523 patients with RA and OA were collected from synovectomy or arthroplasty procedures followed  
524 by cryopreservation as previously described<sup>96</sup>. RA samples with high levels of lymphocyte  
525 infiltration (as scored by a pathologist on histologic sections) were identified as "inflamed" and  
526 used for downstream analysis. Next, cryopreserved synovial tissue fragments were dissociated  
527 by a mechanical and enzymatic digestion<sup>96</sup>, followed by flow sorting to enrich for live synovial  
528 cells. For each tissue sample, 15,000 viable cells were isolated and lysed to extract nuclei  
529 according to manufacturer protocol (10X Genomics). Joint sc-RNA- and sc-ATAC-seq libraries  
530 were prepared using the 10x Genomics Single Cell Multiome ATAC + Gene Expression kit  
531 according to manufacturer's instructions. Libraries were sequenced with paired-end 150-bp  
532 reads on an Illumina Novaseq to a target depth of 20,000 read pairs per nuclei for mRNA  
533 libraries and 25,000 read pairs per nucleus for the ATAC libraries. Demultiplexed scRNA-seq  
534 fastq files were inputted into the Cell Ranger ARC pipeline (version 2.0.0) from 10x Genomics  
535 to generate barcoded count matrix of gene expression. For ATAC-seq, we trimmed adaptor and  
536 primer sequences and mapped the trimmed reads to the hg38 genome by BWA-MEM with  
537 default parameters. To deduplicate reads from PCR amplification bias within a cell while  
538 keeping reads originating from the same positions but from different cells, we used in-house  
539 scripts (manuscript in preparation).



Sakaue et al

540

541 *Uniform processing of single-cell multimodal datasets*

542 In addition to our arthritis-tissue multimodal dataset, we downloaded all publicly available  
543 multimodal RNA-seq/ATAC-seq datasets from adult human tissues ( $n_{\text{dataset}} = 9$ , as of April  
544 2022). We processed these downloaded count matrices of gene expression and ATAC data.  
545 Briefly, we applied QC to both the nuclear RNA data and the ATAC data based on RNA counts,  
546 ATAC fragments, nucleosome signal, and TSS enrichment (**Supplementary Table 7**). We only  
547 kept cells that had passed QC in both RNA-seq and ATAC-seq. Then to identify open chromatin  
548 regions (peaks), we used macs2 to call open chromatin peaks using post-QC ATAC-seq data.  
549 We thus obtained count matrices of gene expression and ATAC peaks with corresponding cell  
550 barcodes. Gene expression counts were normalized using the NormalizeData function  
551 (Seurat<sup>97</sup>), scaled using the ScaleData function (Seurat), and batch corrected using Harmony<sup>98</sup>.  
552 We visualized the cells in two low-dimensional embeddings with UMAP by using 20  
553 batch-corrected principal components from these normalized gene expression matrices (**Figure**  
554 **1c**). When original cell labels are provided by the authors, we used those labels to obtain broad  
555 cell type categories. When they are not available, we performed reference-query mapping by  
556 Seurat and PBMC reference object to define broad cell type labels. ATAC peak matrix was  
557 binarized to have 1 if a count is  $> 0$  and 0 otherwise.

558

559 *SCENT method*

Sakaue et al

560 We defined *cis*-peaks as any peaks whose center is within the window +/-500 bp from the target  
561 gene's TSS. We modeled the association between peak's binarized accessibility and the target  
562 gene's expression with Poisson distribution:

$$E_i \sim \text{Poisson}(\lambda_i)$$

$$\log(\lambda_i) = \beta_0 + \beta_{peak}X_{peak} + \beta_{\%mito}X_{\%mito} + \beta_{nUMI}X_{nUMI} + \beta_{batch}X_{batch}$$

563 where  $E_i$  is the observed expression count of  $i$ th gene, and  $\lambda_i$  is the expected count under  
564 Poisson distribution.  $\beta_{peak}$  indicates the effect of chromatin accessibility of a peak on  $i$  th  
565 gene expression.  $\beta_{\%mito}$ ,  $\beta_{nUMI}$ , and  $\beta_{batch}$  each represents the effect of covariates,  
566 percentage of mitochondrial reads per cell as a measure of cell quality, the number of UMIs in  
567 the cell, and the batch, respectively. To assess significance of  $\beta_{peak}$ , we used bootstrapping  
568 procedures, where we resampled cells with replacement in each procedure and estimate  
569  $\beta'_{peak}$  within those cells. To reduce computational burden, we adaptively increased the number  
570 of from at least 100 and up to 10,000, depending on the significance of  $\beta_{peak}$  in each chunk of  
571 bootstrapping trials. To avoid spurious associations from rare ATAC peak and rare gene  
572 expression, we QCed *cis*-peak-gene pairs we test so that both peak and gene should have  
573 been expressed in at least 5% of the cells we analyze. We finally defined a set of significant  
574 peak-gene pairs for each cell type based on FDR (Benjamini & Hochberg correction).

575 When we tested the calibration of statistics from SCENT or other regression strategies  
576 (**Supplementary Figure 1**), we used null dataset where we randomly permuted cell labels in  
577 the ATAC-seq and ran the regression model we tested.

578

Sakaue et al

579 *ArchR peak2gene and Signac LinkPeaks method*

580 We analyzed arthritis-tissue dataset with ArchR<sup>49</sup> and Signac<sup>50</sup> for single-cell multimodal data,  
581 which both have a function to define peak-gene linkages. In brief, ArchR takes multimodal data  
582 and creates low-overlapping aggregates of single cells based on  $k$ -nearest neighbor graph.  
583 Then it correlates peak accessibility with gene expression by Pearson correlation of aggregated  
584 and log2-normalized peak count and gene count. Signac computes the Pearson correlation  
585 coefficient  $r$  (corSparse function in R) for each gene and for each peak within 500kb of the gene  
586 TSS. Signac then compares the observed correlation coefficient with an expected correlation  
587 coefficient for each peak given the GC content, accessibility, and length of the peak. Signac  
588 defines  $P$  value for each gene-peak links from the  $z$  score based on this comparison. We ran  
589 both methods on arthritis-tissue dataset with default parameters. We output statistics for all  
590 peak-gene pairs we tested without any cut-off for correlation  $r$  or  $P$  values. We used FDR in the  
591 output from ArchR software, or computed FDR using  $P$  values in the output from Signac  
592 software by Benjamini & Hochberg correction. We defined significant peak-gene linkages as  
593 those with  $FDR < 0.10$ , and used varying correlation  $r$  to assess the precision and recall in the  
594 causal variant enrichment analysis (see later sections in **Method**).

595

596 *Replication across datasets*

597 Since we have the same immune-related cell types across different multimodal datasets, we  
598 evaluated the concordance of enhancer-gene map in a discovery dataset (arthritis-tissue  
599 dataset) when compared with other replication datasets including immune-related cell types

Sakaue et al

600 (Public PBMC, NeurIPS, SHARE-seq and NEAT-seq datasets). To this end, we used most  
601 stringent FDR threshold for defining an enhancer-gene map in arthritis-tissue dataset (FDR <  
602 1%). We then used more lenient threshold for defining an enhancer-gene map in replication  
603 datasets (FDR < 10%), which is a similar strategy used in assessing replication in GWAS. For  
604 each cell type and for each replication dataset, we took the intersection of enhancer-gene links  
605 defined as significant in both datasets. We assessed the directional concordance (i.e.,  
606 concordance of the sign of  $\beta_{peak}$ ) and the Pearson's correlation  $r$  of  $\beta_{peak}$  between the  
607 discovery and the replication for these peak-gene pairs. For the largest replication dataset of  
608 Public PBMC, we performed the same analysis for enhancer-gene map from ArchR and Signac  
609 software.

610

### 611 *Conservation score analysis*

612 To compare the evolutionary conservation across species between our annotated peaks and the  
613 other peaks, we used phastCons<sup>65</sup> score. We downloaded the phastCons score for multiple  
614 alignments of 99 vertebrate genomes from  
615 <https://hgdownload.cse.ucsc.edu/goldenpath/hg19/phastCons100way/>. We lifted them over to  
616 GRCh38 by LiftOver software. We used SCENT results for arthritis-tissue, Public PBMC and  
617 NeurIPS for conservation score analysis as representative datasets with the largest numbers of  
618 cells. Because each gene should have variable functional importance and conservation, we  
619 assessed each gene separately. For each gene, we took (1) an annotation of interest for the  
620 gene and (2) all *cis*-non-coding regions (< 500kb from a gene), and computed the mean

Sakaue et al

621 phastCons score of each of two sets of the peaks. As annotations to be tested, we used a.  
622 exonic regions of the gene, b. SCENT peaks for the gene, and c. all ATAC peaks in cis-regions  
623 from the gene (< 500 kb). Then, we took the difference between two mean differences  
624 (  $\Delta$  phastCons score ), and computed the mean differences across all the genes  
625 (mean  $\Delta$  phastCons score) as follows.

$$\text{mean } \Delta \text{ phastCons score} = \frac{1}{n_{gene}} \sum_{gene} (\overline{phastCons}_{g,in\_annot} - \overline{phastCons}_{g,non-coding})$$

626 By bootstrapping the genes, we calculated the 95% CI of the mean  $\Delta$  phastCons score.  
627 If this metric is positive, that indicates that the annotated regions are more conserved than  
628 non-coding regions.

629 We also calculated similar  $\Delta$  phastCons score by comparing the SCENT peaks with  
630 TSS-distance-matched non-SCENT peaks in each dataset.

$$\begin{aligned} \text{mean } \Delta \text{ phastCons score} \\ = \frac{1}{n_{gene}} \sum_{gene} (\overline{phastCons}_{g,peak\_in\_SCENT} - \overline{phastCons}_{g,peak\_non\_SCENT\_matched}) \end{aligned}$$

631 By bootstrapping the genes, we again calculated the 95% CI of the mean  $\Delta$  phastCons  
632 score. If this metric is positive, that indicates that SCENT peaks are more conserved than  
633 TSS-distance-matched non-SCENT peaks.

634  
635 *Construction of a set of TSS-matched non-SCENT peaks*

636 To assess the effect of TSS distance when comparing SCENT peaks with non-SCENT peaks,  
637 we matched each one of the SCENT peak-gene pairs to one non-SCENT peak-gene pair,  
638 where the peak had the most similar TSS distance to the same gene among all the ATAC peaks

Sakaue et al

639 in *cis* in each of the dataset. We confirmed that the resulting TSS-distance-matched  
640 non-SCENT peak-gene pairs demonstrated the similar distributions of TSS distance when  
641 compared with the SCENT peak-gene pairs (**Supplementary Figure 5b**).

642

643 *Gene's constraint and the number of significant SCENT peaks for a gene*

644 We sought to investigate the relationship between the number of significant SCENT peaks for  
645 each gene and the gene's evolutionary constraint. We used pLI and LOEUF as metrics for the  
646 gene's loss-of-function intolerance within human population. We downloaded both pLI and  
647 LOEUF scores from gnomAD browser (<https://gnomad.broadinstitute.org/downloads>). We  
648 inverse-normal transformed the raw number of significant SCENT peaks for each gene, since  
649 the raw number of significant SCENT peaks for each gene is rightly skewed (**Supplementary**  
650 **Figure 3a**). We performed linear regression between the normalized number of significant  
651 SCENT peaks and pLI or LOEUF score with accounting for gene length, which could be  
652 potential confounding factor for pLI and LOEUF<sup>66,67</sup>.

653

654 *Validation with CRISPR-Flow FISH results*

655 To validate our SCENT enhancer-gene links, we used published CRISPR-Flow FISH  
656 experiments as potential ground-truth positive enhancer element-gene links and negative  
657 enhancer element-gene links. We downloaded the experimental results from the  
658 **Supplementary Table 5** of original publication<sup>39</sup>. We used "Perturbation Target" as candidate  
659 enhancer elements. We defined 283 positive enhancer element-gene links when they are

Sakaue et al

660 “TRUE” for “Regulated” column (i.e., the element-gene pair is significant and the effect size is  
661 negative) and 5,472 negative enhancer element-gene links when they are “FALSE” for  
662 “Regulated” column. We lifted them over to GRCh38 and obtained final sets of 278 positive  
663 links and 5,470 negative links.

664 We used two most powered datasets, arthritis-tissue and Public PBMC datasets. For  
665 each dataset, we used “bedtools intersect” to categorize SCENT peak-gene links and  
666 non-SCENT ATAC peak-gene pairs into either CRISPR-positive or CRISPR-negative groups,  
667 based on whether these peaks overlapped with positive or negative CRISPR-Flow FISH links  
668 for the same gene (**Supplementary Table 3**). We finally performed two-sided Fisher’s exact  
669 test to assess the enrichment of CRISPR-positive links within SCENT peak-gene links in each  
670 dataset.

671  
672 *Cell-type-specific SCENT tracks and aggregated SCENT tracks*

673 For cell types with more than 5,000 cells across datasets, we concatenated SCENT peak-gene  
674 linkages across all the datasets to create cell-type-specific SCENT tracks. We collected a set of  
675 SCENT peak-gene linkages for the same cell type and used “bedtools merge” function (for each  
676 gene) to obtain a union of SCENT peaks for each gene. Similarly, we created aggregated  
677 SCENT tracks across all the cell types and all datasets. We collected all sets of SCENT  
678 peak-gene linkages and used “bedtools merge” function (for each gene) to obtain a union of  
679 SCENT peaks for each gene across all the cell types and all datasets.

680



Sakaue et al

681 *Causal variant enrichment analysis using eQTLs*

682 We defined a causal enrichment for eQTL within SCENT enhancers and other annotations by  
683 using statistically fine-mapped variant-gene combinations from GTEx. We used publicly  
684 available statistics analyzed by CAVIAR software<sup>20</sup>, and selected variants with PIP > 0.2 as  
685 putatively causal (fine-mapped) variants for primary analyses. For the primary enrichment  
686 analysis, we aggregated fine-mapped variants from all the 49 tissues. For cell-type-specific  
687 SCENT enrichment analysis (**Supplementary Figure 6e**), we used fine-mapped variants from  
688 each tissue separately. We intersected these putatively causal variants with our annotation  
689 (SCENT peaks, ArchR peaks or Signac peaks). We then retained any variants which the linking  
690 method (SCENT, ArchR and Signac) connected to the same gene as GTEx phenotype gene.

$$Enrichment_{gene_i} = \frac{\# \text{causal\_var\_in\_annot}_{gene_i} / \sum \text{common\_var\_in\_annot}_{gene_i}}{\# \text{causal\_var}_{gene_i} / \sum \text{common\_var\_in\_cis}_{gene_i}}$$

691

$$Overall\_Enrichment = \frac{1}{n} \sum_{i=1}^n Enrichment_{gene_i}$$

692 For each gene  $i$  (expression phenotype), we divided the number of putatively causal variants  
693 within an annotation normalized by the number of common variants within an annotation by the  
694 number of all causal variants for gene  $i$  normalized by the number of all common variants  
695 within cis-region from for gene  $i$ . To calculate common variants within annotation or within  
696 locus, we used 1000 Genomes Project genotype. We selected any variants with minor allele

Sakaue et al

697 frequency > 1% in European population as a set of common variants to be intersected with  
698 each annotation. To derive *Overall\_Enrichment* score, we took the mean across all the genes.

699 To have further insights into precision and recall and compare against ArchR peak2gene  
700 and Signac LinkPeaks functions, we varied the threshold for defining a set of significant  
701 peak-gene linkages in each software (i.e., FDR in SCENT {0.50, 0.30, 0.20, 0.10, 0.05, 0.02},  
702 Pearson's correlation  $r$  {any, 0, 0.1, 0.3, 0.5, 0.7} in ArchR, and correlation score {any, 0, 0.05,  
703 0.1, 0.15} in Signac). We then used each set of peak-gene linkages to re-calculate causal  
704 variant enrichment *Overall\_Enrichment* score (**Figure 3b**).

705 We also assessed the impact of PIP threshold in defining a set of statistically  
706 fine-mapped variants on the causal variant enrichment analysis. To do so, we re-defined the set  
707 of putative causal variants with more stringent PIP thresholds (PIP > 0.5 and PIP > 0.7), and  
708 re-computed the calculate causal variant enrichment *Overall\_Enrichment* score.

709

### 710 *GWAS fine-mapping results*

711 We used GWAS fine-mapping results in FinnGen release 6<sup>70</sup> upon registration and publicly  
712 available GWAS fine-mapping results in UK Biobank<sup>71</sup> (<https://www.finucanelab.org/data>). For  
713 FinnGen traits, we downloaded all the fine-mapping results by SuSIE software<sup>22</sup> and  
714 systematically selected any traits with case count > 1,000. We then selected non-coding  
715 fine-mapped loci which did not include any non-synonymous or splicing variants with PIP > 0.5.  
716 We thus analyzed 1,046 traits and 5,753 loci in total after QC. For UK Biobank, we analyzed the  
717 fine-mapping results by SuSIE software for all 94 traits including binary and quantitative traits.

Sakaue et al

718 Since the genomic coordinates for the UK Biobank fine-mapping results were hg19, we lifted  
719 them over to GRCh38 by using LiftOver software. We again selected non-coding fine-mapped  
720 loci which did not include any non-synonymous or splicing variants with PIP > 0.5. We thus  
721 analyzed 7,274 loci in total after QC.

722 We analyzed three additional autoimmune GWAS fine-mapping results for RA<sup>26</sup>, T1D<sup>79</sup>,  
723 and IBD<sup>29</sup>, given our special interest in immune-mediated traits. We similarly selected  
724 non-coding fine-mapped loci which did not include any non-synonymous or splicing variants  
725 with PIP > 0.5, and lifted the results over to GRCh38 by using LiftOver software. We defined  
726 117 loci for RA, 77 loci for T1D and 86 loci for IBD.

727

728 *Causal variant enrichment analysis using GWASs*

729 We defined a causal enrichment for GWAS within SCENT enhancers and other annotations by  
730 using statistically fine-mapped variants from FinnGen<sup>70</sup> and UK Biobank<sup>71</sup> which we described  
731 in the previous section. We selected variants with PIP > 0.2 as putatively causal variants for  
732 primary analyses.

$$Enrichment_{trait_i} = \frac{\# causal\_var\_in\_annot_{trait_i} / \sum common\_var\_in\_annot_{trait_i}}{\# causal\_var_{trait_i} / \sum common\_var\_across\_loci_{trait_i}}$$

733

$$Overall\_Enrichment = \frac{1}{n} \sum_{i=1}^n Enrichment_{trait_i}$$

Sakaue et al

734 For each trait  $i$ , we divided the number of putatively causal variants within an annotation  
735 (across all loci for trait  $i$ ) normalized by the number of common variants within an annotation by  
736 the number of all causal variants for trait  $i$  normalized by the number of all common variants  
737 within all significant loci analyzed for the trait  $i$ . To calculate common variants within annotation  
738 or within locus, we again used 1000 Genomes Project variants with minor allele frequency > 1%  
739 in European population. To derive *Overall\_Enrichment* score, we took the mean across all the  
740 traits.

741

742 *Comparison with bulk-tissue-based regulatory annotation and enhancer-gene maps*

743 We downloaded per-group EpiMap enhancer-gene links from  
744 <https://personal.broadinstitute.org/cboix/epimap/links/pergroup/>. We lifted the genomic  
745 coordinates to GRCh38 by using LiftOver software. When we assessed aggregated EpiMap  
746 enhancer-gene links across all the groups, we used “bedtools merge” function for each gene to  
747 create a union of all enhancer-gene links. To benchmark the precision and recall, we used  
748 EpiMap correlation scores to define variable sets of enhancer-gene links from EpiMap based on  
749 the threshold of EpiMap correlation score.

750 We downloaded ABC predictions in 131 cell types and tissues from  
751 <ftp://ftp.broadinstitute.org/outgoing/lincRNA/ABC/AllPredictions.AvgHiC.ABC0.015.minus150.F>  
752 [orABCPaperV3.txt.gz](#). We lifted the genomic coordinates to GRCh38 by using LiftOver software.  
753 When we assessed cell-type-specific ABC model with SCENT enhancers, we aggregated cell  
754 lines or cell types to be corresponding with our cell types (B cell, T cell, Myeloid cells, and

Sakaue et al

755 fibroblasts). When we assessed aggregated ABC enhancer-gene links across all the groups,  
756 we used “bedtools merge” function for each gene to create a union of all enhancer-gene links.  
757 To benchmark the precision and recall, we used ABC scores to define variable sets of  
758 enhancer-gene links from ABC model based on the threshold of ABC score.

759 To assess precision and recall and compare against bulk-tissue based methods (i.e.,  
760 EpiMap and ABC model), we used sets of significant peak-gene linkages in each method with  
761 varying thresholds (i.e., FDR in SCENT {0.5, 0.3, 0.2, 0.1, 0.05, 0.02}, EpiMap score {0, 0.4, 0.8,  
762 0.9} in EpiMap, and ABC score {0, 0.05, 0.1, 0.2} for ABC model). We then used each set of  
763 peak-gene linkages to re-calculate causal variant enrichment for GWAS (**Figure 3d**).

764 We also assessed the impact of PIP threshold in defining a set of statistically  
765 fine-mapped variants on the causal variant enrichment analysis. To do so, we re-defined the set  
766 of putative causal variants with more stringent PIP thresholds (PIP > 0.5 and PIP > 0.7), and  
767 re-computed the calculate causal variant enrichment *Overall\_Enrichment* score.

768  
769 *caQTL analysis using scATAC-seq samples with genotype*

770 We used independent arthritis-tissue dataset with single-cell unimodal ATAC-seq data with  
771 genotype ( $n = 17$ , *manuscript in preparation*) to define chromatin accessibility QTLs (caQTLs).  
772 We used two methods, binomial test and RASQUAL. Briefly, we genotyped donors by using  
773 Illumina Multi-Ethnic Genotyping Array. We performed quality control of genotype by sample  
774 call rate > 0.99, variant call rate > 0.99, minor allele frequency > 0.01, and  $P_{HWE} > 1.0 \times 10^{-6}$ .  
775 We performed haplotype phasing with SHAPEIT2 software<sup>99</sup> and performed whole-genome

Sakaue et al

776 imputation by using minimac3 software<sup>100</sup> with a reference panel of 1000 Genomes Project  
777 phase 3<sup>101</sup>. After imputation, we selected variants with imputation  $Rsq > 0.7$  as post-imputation  
778 QC. We next created a merged bam file of ATAC-seq for each donor and each cell type by  
779 aggregating all the reads. Using the imputed genotype for each donor and aggregated bam files  
780 for each donor and cell type, we applied WASP<sup>102</sup> to correct any bias in read mapping toward  
781 reference alleles to accurately quantify allelic imbalance. We thus created a bias-corrected bam  
782 files for each donor and cell type.

783 For binomial tests, we ran ASEReadCounter module in GATK software<sup>103</sup> using the  
784 bias-corrected bam files as input to quantify allelic imbalance in heterozygous sites with read  
785 count  $> 4$  within ATAC peak counts. We first performed one-sided binomial tests in each donor,  
786 and meta-analyzed the statistics across donors by Fisher's method if multiple donors shared  
787 the same heterozygous site. For RASQUAL, we created a VCF file containing both genotype  
788 dosage and allelic imbalance from ASEReadCounter. We quantified the read coverage for each  
789 peak and for each donor by "bedtools coverage" function. We created a peak by donor matrix  
790 with read coverage. We QCed samples with  $\log(\text{total mapped fragments})$  fewer than mean  $-$   
791  $2SD$  across samples in each cell type. We QCed peaks so that at least two individuals have any  
792 fragments for the peak. We then ran RASQUAL software with the inter-individual differences in  
793 ATAC peak counts (in a peak by donor matrix) and intra-individual allelic imbalance (in VCF),  
794 with accounting for chromatin accessibility PCs (the first  $N$  components whose explained  
795 variances are greater than those from permutation result), 3 genotype PCs, sample site and sex  
796 as covariates. RASQUAL output chi-squared statistics and  $P$  values. We computed FDR from

Sakaue et al

797 these raw  $P$  values by Benjamini & Hochberg correction on local multiple test burden (i.e., the  
798 number of *cis*-SNPs in the region). To correct for genome-wide multiple testing, we ran the  
799 RASQUAL with random permutation, where the relationship between sample labels and the  
800 count matrix was broken. Thus, we derived  $q$  values for each candidate caQTL.

801 We finally intersected these peaks with significant caQTL effect in each significance  
802 threshold with SCENT peaks and assessed causal variants enrichment within these peaks for  
803 GWAS as explained in the previous sections.

804

#### 805 *ClinVar analysis*

806 We downloaded the latest clinically reported variant list registered at ClinVar from  
807 [https://ftp.ncbi.nlm.nih.gov/pub/clinvar/vcf\\_GRCh38/clinvar.vcf.gz](https://ftp.ncbi.nlm.nih.gov/pub/clinvar/vcf_GRCh38/clinvar.vcf.gz). We then screened the  
808 variants to exclude (1) exonic variants and (2) variants categorized as “benign”. We defined the  
809 ClinVar variant density as the number of the non-coding and non-benign variants within each  
810 annotation x 1,000 divided by the total length (bp) of each annotation.

811

#### 812 *Somatic mutation analysis*

813 We used a list of somatic mutation hotspot in Supplementary Table 2-20 of the original  
814 publication<sup>94</sup>. We lifted the genomic coordinates to GRCh38 by using LifOver software. We then  
815 intersected the non-coding somatic mutation hotspots with our cell-type-specific SCENT peaks.  
816 We compared the intersected elements’ target genes by SCENT with the “Annotate\_Gene”  
817 column from the original publication.



Sakaue et al

818

819 *Downsampling experiments*

820 To evaluate the effect of cell numbers on the statistical power in detecting significant SCENT  
821 enhancer-gene linkages, we performed downsampling experiments in fibroblast (the most  
822 abundant cell type in arthritis-tissue dataset,  $n_{\text{cell}} = 9,905$ ). We randomly samples cells ( $n_{\text{cell}} =$   
823 500, 1000, 2500, 5000, and 7500). We then applied SCENT to each of the subset groups of  
824 cells and defined significant peak-gene links with  $\text{FDR} < 10\%$ . We counted the number of  
825 significant peak-gene links in each of the subset groups of cells, and annotated peaks based on  
826 the distance to the TSS to the target gene.

827

828 **References**

- 829 1. Welter D, MacArthur J, Morales J, et al. The NHGRI GWAS Catalog, a curated resource of  
830 SNP-trait associations. *Nucleic Acids Res.* 2014;42(Database issue):D1001-6.  
831 doi:10.1093/nar/gkt1229
- 832 2. Visscher PM, Wray NR, Zhang Q, et al. 10 Years of GWAS Discovery: Biology, Function,  
833 and Translation. *Am J Hum Genet.* 2017;101(1):5-22. doi:10.1016/J.AJHG.2017.06.005
- 834 3. Buniello A, Macarthur JAL, Cerezo M, et al. The NHGRI-EBI GWAS Catalog of published  
835 genome-wide association studies, targeted arrays and summary statistics 2019. *Nucleic*  
836 *Acids Res.* 2019;47(D1):D1005-D1012. doi:10.1093/NAR/GKY1120
- 837 4. Claussnitzer M, Cho JH, Collins R, et al. A brief history of human disease genetics. *Nature*  
838 *2020 577:7789.* 2020;577(7789):179-189. doi:10.1038/s41586-019-1879-7
- 839 5. Plenge RM, Scolnick EM, Altshuler D. Validating therapeutic targets through human  
840 genetics. *Nature Reviews Drug Discovery 2013 12:8.* 2013;12(8):581-594.  
841 doi:10.1038/nrd4051
- 842 6. Shendure J, Findlay GM, Snyder MW. Genomic Medicine—Progress, Pitfalls, and Promise.  
843 *Cell.* 2019;177(1):45-57. doi:10.1016/J.CELL.2019.02.003

Sakaue et al

- 844 7. Schaid DJ, Chen W, Larson NB. From genome-wide associations to candidate causal  
845 variants by statistical fine-mapping. *Nature Reviews Genetics* 2018 19:8.  
846 2018;19(8):491-504. doi:10.1038/s41576-018-0016-z
- 847 8. Maurano MT, Humbert R, Rynes E, et al. Systematic localization of common  
848 disease-associated variation in regulatory DNA. *Science* (1979).  
849 2012;337(6099):1190-1195.  
850 doi:10.1126/SCIENCE.1222794/SUPPL\_FILE/MAURANO.SM.PDF
- 851 9. Edwards SL, Beesley J, French JD, Dunning M. Beyond GWASs: illuminating the dark  
852 road from association to function. *Am J Hum Genet.* 2013;93(5):779-797.  
853 doi:10.1016/J.AJHG.2013.10.012
- 854 10. Trynka G, Sandor C, Han B, et al. Chromatin marks identify critical cell types for fine  
855 mapping complex trait variants. *Nat Genet.* 2013;45(2):124-130. doi:10.1038/ng.2504
- 856 11. Sanyal A, Lajoie BR, Jain G, Dekker J. The long-range interaction landscape of gene  
857 promoters. *Nature* 2012 489:7414. 2012;489(7414):109-113. doi:10.1038/nature11279
- 858 12. Smemo S, Tena JJ, Kim KH, et al. Obesity-associated variants within FTO form  
859 long-range functional connections with IRX3. *Nature* 2014 507:7492.  
860 2014;507(7492):371-375. doi:10.1038/nature13138
- 861 13. Won H, de La Torre-Ubieta L, Stein JL, et al. Chromosome conformation elucidates  
862 regulatory relationships in developing human brain. *Nature* 2016 538:7626.  
863 2016;538(7626):523-527. doi:10.1038/nature19847
- 864 14. Strober BJ, Elorbany R, Rhodes K, et al. Dynamic genetic regulation of gene expression  
865 during cellular differentiation. *Science.* 2019;364(6447):1287-1290.  
866 doi:10.1126/SCIENCE.AAW0040
- 867 15. Cuomo ASE, Seaton DD, McCarthy DJ, et al. Single-cell RNA-sequencing of  
868 differentiating iPS cells reveals dynamic genetic effects on gene expression. *Nature*  
869 *Communications* 2020 11:1. 2020;11(1):1-14. doi:10.1038/s41467-020-14457-z
- 870 16. Zhernakova D v., Deelen P, Vermaat M, et al. Identification of context-dependent  
871 expression quantitative trait loci in whole blood. *Nat Genet.* 2017;49(1):139-145.  
872 doi:10.1038/NG.3737
- 873 17. Nathan A, Asgari S, Ishigaki K, et al. Single-cell eQTL models reveal dynamic T cell state  
874 dependence of disease loci. *Nature* 2022 606:7912. 2022;606(7912):120-128.  
875 doi:10.1038/s41586-022-04713-1

Sakaue et al

- 876 18. Wakefield J. A Bayesian Measure of the Probability of False Discovery in Genetic  
877 Epidemiology Studies. *Am J Hum Genet.* 2007;81(2):208. doi:10.1086/519024
- 878 19. Maller JB, McVean G, Byrnes J, et al. Bayesian refinement of association signals for 14  
879 loci in 3 common diseases. *Nat Genet.* 2012;44(12):1294-1301. doi:10.1038/NG.2435
- 880 20. Hormozdiari F, Kostem E, Kang EY, Pasaniuc B, Eskin E. Identifying causal variants at  
881 loci with multiple signals of association. *Genetics.* 2014;198(2):497-508.  
882 doi:10.1534/GENETICS.114.167908
- 883 21. Benner C, Spencer CCA, Havulinna AS, Salomaa V, Ripatti S, Pirinen M. FINEMAP:  
884 efficient variable selection using summary data from genome-wide association studies.  
885 *Bioinformatics.* 2016;32(10):1493-1501. doi:10.1093/BIOINFORMATICS/BTW018
- 886 22. Wang G, Sarkar A, Carbonetto P, Stephens M. A simple new approach to variable  
887 selection in regression, with application to genetic fine mapping. *J R Stat Soc Series B Stat*  
888 *Methodol.* 2020;82(5):1273-1300. doi:10.1111/RSSB.12388
- 889 23. Weissbrod O, Hormozdiari F, Benner C, et al. Functionally informed fine-mapping and  
890 polygenic localization of complex trait heritability. *Nature Genetics* 2020 52:12.  
891 2020;52(12):1355-1363. doi:10.1038/s41588-020-00735-5
- 892 24. Wojcik GL, Graff M, Nishimura KK, et al. Genetic analyses of diverse populations  
893 improves discovery for complex traits. *Nature* 2019 570:7762. 2019;570(7762):514-518.  
894 doi:10.1038/s41586-019-1310-4
- 895 25. Chen MH, Raffield LM, Mousas A, et al. Trans-ethnic and Ancestry-Specific Blood-Cell  
896 Genetics in 746,667 Individuals from 5 Global Populations. *Cell.*  
897 2020;182(5):1198-1213.e14. doi:10.1016/J.CELL.2020.06.045
- 898 26. Ishigaki K, Sakaue S, Terao C, et al. Trans-ancestry genome-wide association study  
899 identifies novel genetic mechanisms in rheumatoid arthritis. *medRxiv.*  
900 2021;12:2021.12.01.21267132. doi:10.1101/2021.12.01.21267132
- 901 27. Kichaev G, Pasaniuc B. Leveraging Functional-Annotation Data in Trans-ethnic  
902 Fine-Mapping Studies. *Am J Hum Genet.* 2015;97(2):260-271.  
903 doi:10.1016/J.AJHG.2015.06.007
- 904 28. Kanai M, Ulirsch JC, Karjalainen J, et al. Insights from complex trait fine-mapping across  
905 diverse populations. *medRxiv.* Published online September 5,  
906 2021:2021.09.03.21262975. doi:10.1101/2021.09.03.21262975

Sakaue et al

- 907 29. Huang H, Fang M, Jostins L, et al. Fine-mapping inflammatory bowel disease loci to  
908 single-variant resolution. *Nature*. 2017;547(7662):173-178. doi:10.1038/NATURE22969
- 909 30. Farh KKH, Marson A, Zhu J, et al. Genetic and epigenetic fine mapping of causal  
910 autoimmune disease variants. *Nature 2014 518:7539*. 2014;518(7539):337-343.  
911 doi:10.1038/nature13835
- 912 31. Mahajan A, Taliun D, Thurner M, et al. Fine-mapping type 2 diabetes loci to single-variant  
913 resolution using high-density imputation and islet-specific epigenome maps. *Nature*  
914 *Genetics 2018 50:11*. 2018;50(11):1505-1513. doi:10.1038/s41588-018-0241-6
- 915 32. Kichaev G, Yang WY, Lindstrom S, et al. Integrating functional data to prioritize causal  
916 variants in statistical fine-mapping studies. *PLoS Genet*. 2014;10(10).  
917 doi:10.1371/JOURNAL.PGEN.1004722
- 918 33. Roadmap Epigenomics Consortium, Kundaje A, Meuleman W, et al. Integrative analysis  
919 of 111 reference human epigenomes. *Nature 2015 518:7539*. 2015;518(7539):317-330.  
920 doi:10.1038/nature14248
- 921 34. Chen L, Ge B, Casale FP, et al. Genetic Drivers of Epigenetic and Transcriptional  
922 Variation in Human Immune Cells. *Cell*. 2016;167(5):1398-1414.e24.  
923 doi:10.1016/j.cell.2016.10.026
- 924 35. Dunham I, Kundaje A, Aldred SF, et al. An integrated encyclopedia of DNA elements in the  
925 human genome. *Nature*. 2012;489(7414):57-74. doi:10.1038/NATURE11247
- 926 36. Ernst J, Kheradpour P, Mikkelsen TS, et al. Mapping and analysis of chromatin state  
927 dynamics in nine human cell types. *Nature 2011 473:7345*. 2011;473(7345):43-49.  
928 doi:10.1038/nature09906
- 929 37. Boix CA, James BT, Park YP, Meuleman W, Kellis M. Regulatory genomic circuitry of  
930 human disease loci by integrative epigenomics. *Nature 2021 590:7845*.  
931 2021;590(7845):300-307. doi:10.1038/s41586-020-03145-z
- 932 38. Fulco CP, Nasser J, Jones TR, et al. Activity-by-Contact model of enhancer-promoter  
933 regulation from thousands of CRISPR perturbations. *Nat Genet*. 2019;51(12):1664.  
934 doi:10.1038/S41588-019-0538-0
- 935 39. Nasser J, Bergman DT, Fulco CP, et al. Genome-wide enhancer maps link risk variants to  
936 disease genes. *Nature 2021 593:7858*. 2021;593(7858):238-243.  
937 doi:10.1038/s41586-021-03446-x

Sakaue et al

- 938 40. Gazal S, Weissbrod O, Hormozdiari F, et al. Combining SNP-to-gene linking strategies to  
939 identify disease genes and assess disease omnigenicity. *Nat Genet.* 2022;54(6):827-836.  
940 doi:10.1038/S41588-022-01087-Y
- 941 41. Pickar-Oliver A, Gersbach CA. The next generation of CRISPR–Cas technologies and  
942 applications. *Nature Reviews Molecular Cell Biology* 2019 20:8. 2019;20(8):490-507.  
943 doi:10.1038/s41580-019-0131-5
- 944 42. Anzalone A v., Koblan LW, Liu DR. Genome editing with CRISPR–Cas nucleases, base  
945 editors, transposases and prime editors. *Nature Biotechnology* 2020 38:7.  
946 2020;38(7):824-844. doi:10.1038/s41587-020-0561-9
- 947 43. Baglaenko Y, Macfarlane D, Marson A, Nigrovic PA, Raychaudhuri S. Genome editing to  
948 define the function of risk loci and variants in rheumatic disease. *Nature Reviews*  
949 *Rheumatology* 2021 17:8. 2021;17(8):462-474. doi:10.1038/s41584-021-00637-8
- 950 44. Cao J, Cusanovich DA, Ramani V, et al. Joint profiling of chromatin accessibility and gene  
951 expression in thousands of single cells. *Science (1979)*. 2018;361(6409):1380-1385.  
952 doi:10.1126/SCIENCE.AAU0730/SUPPL\_FILE/AAU0730\_TABLESS1\_S13.XLSX
- 953 45. Chen S, Lake BB, Zhang K. High-throughput sequencing of the transcriptome and  
954 chromatin accessibility in the same cell. *Nature Biotechnology* 2019 37:12.  
955 2019;37(12):1452-1457. doi:10.1038/s41587-019-0290-0
- 956 46. Ma S, Zhang B, LaFave LM, et al. Chromatin Potential Identified by Shared Single-Cell  
957 Profiling of RNA and Chromatin. *Cell.* 2020;183(4):1103-1116.e20.  
958 doi:10.1016/J.CELL.2020.09.056
- 959 47. Allaway KC, Gabitto MI, Wapinski O, et al. Genetic and epigenetic coordination of cortical  
960 interneuron development. *Nature* 2021 597:7878. 2021;597(7878):693-697.  
961 doi:10.1038/s41586-021-03933-1
- 962 48. Trevino AE, Müller F, Andersen J, et al. Chromatin and gene-regulatory dynamics of the  
963 developing human cerebral cortex at single-cell resolution. *Cell.*  
964 2021;184(19):5053-5069.e23. doi:10.1016/J.CELL.2021.07.039
- 965 49. Granja JM, Corces MR, Pierce SE, et al. ArchR is a scalable software package for  
966 integrative single-cell chromatin accessibility analysis. *Nature Genetics* 2021 53:3.  
967 2021;53(3):403-411. doi:10.1038/s41588-021-00790-6

Sakaue et al

- 968 50. Stuart T, Srivastava A, Madad S, Lareau CA, Satija R. Single-cell chromatin state analysis  
969 with Signac. *Nature Methods* 2021 18:11. 2021;18(11):1333-1341.  
970 doi:10.1038/s41592-021-01282-5
- 971 51. Pliner HA, Packer JS, McFaline-Figueroa JL, et al. Cicero Predicts cis-Regulatory DNA  
972 Interactions from Single-Cell Chromatin Accessibility Data. *Mol Cell*.  
973 2018;71(5):858-871.e8. doi:10.1016/J.MOLCEL.2018.06.044
- 974 52. Efron B, Tibshirani RJ. An Introduction to the Bootstrap. *An Introduction to the Bootstrap*.  
975 Published online May 14, 1994. doi:10.1201/9780429246593
- 976 53. Lähnemann D, Köster J, Szczurek E, et al. Eleven grand challenges in single-cell data  
977 science. *Genome Biology* 2020 21:1. 2020;21(1):1-35. doi:10.1186/S13059-020-1926-6
- 978 54. Sarkar A, Stephens M. Separating measurement and expression models clarifies  
979 confusion in single-cell RNA sequencing analysis. *Nature Genetics* 2021 53:6.  
980 2021;53(6):770-777. doi:10.1038/s41588-021-00873-4
- 981 55. Chen H, Lareau C, Andreani T, et al. Assessment of computational methods for the  
982 analysis of single-cell ATAC-seq data. *Genome Biol*. 2019;20(1):1-25.  
983 doi:10.1186/S13059-019-1854-5/FIGURES/7
- 984 56. Granja JM, Klemm S, McGinnis LM, et al. Single-cell multiomic analysis identifies  
985 regulatory programs in mixed-phenotype acute leukemia. *Nature Biotechnology* 2019  
986 37:12. 2019;37(12):1458-1465. doi:10.1038/s41587-019-0332-7
- 987 57. Luecken MD, Burkhardt DB, Cannoodt R, et al. A sandbox for prediction and integration of  
988 DNA, RNA, and proteins in single cells. *Proceedings of the Neural Information Processing*  
989 *Systems Track on Datasets and Benchmarks*. 2021;1. Accessed September 11, 2022.  
990 <https://openproblems.bio/neurips>.
- 991 58. Mimitou EP, Lareau CA, Chen KY, et al. Scalable, multimodal profiling of chromatin  
992 accessibility, gene expression and protein levels in single cells. *Nat Biotechnol*.  
993 2021;39(10):1246-1258. doi:10.1038/S41587-021-00927-2
- 994 59. Chen AF, Parks B, Kathiria AS, Ober-Reynolds B, Goronzy JJ, Greenleaf WJ. NEAT-seq:  
995 simultaneous profiling of intra-nuclear proteins, chromatin accessibility and gene  
996 expression in single cells. *Nature Methods* 2022 19:5. 2022;19(5):547-553.  
997 doi:10.1038/s41592-022-01461-y



Sakaue et al

- 998 60. Meijer M, Agirre E, Kabbe M, et al. Epigenomic priming of immune genes implicates  
999 oligodendroglia in multiple sclerosis susceptibility. *Neuron*. 2022;110(7):1193-1210.e13.  
1000 doi:10.1016/J.NEURON.2021.12.034
- 1001 61. Zhang Z, Zamojski M, Smith GR, et al. Single nucleus transcriptome and chromatin  
1002 accessibility of postmortem human pituitaries reveal diverse stem cell regulatory  
1003 mechanisms. *Cell Rep*. 2022;38(10). doi:10.1016/J.CELREP.2022.110467
- 1004 62. Abascal F, Acosta R, Addleman NJ, et al. Expanded encyclopaedias of DNA elements in  
1005 the human and mouse genomes. *Nature* 2020 583:7818. 2020;583(7818):699-710.  
1006 doi:10.1038/s41586-020-2493-4
- 1007 63. Westra HJ, Franke L. From genome to function by studying eQTLs. *Biochim Biophys Acta*.  
1008 2014;1842(10):1896-1902. doi:10.1016/J.BBADIS.2014.04.024
- 1009 64. Hujoel MLA, Gazal S, Hormozdiari F, van de Geijn B, Price AL. Disease Heritability  
1010 Enrichment of Regulatory Elements Is Concentrated in Elements with Ancient Sequence  
1011 Age and Conserved Function across Species. *Am J Hum Genet*. 2019;104(4):611-624.  
1012 doi:10.1016/j.ajhg.2019.02.008
- 1013 65. Siepel A, Bejerano G, Pedersen JS, et al. Evolutionarily conserved elements in vertebrate,  
1014 insect, worm, and yeast genomes. *Genome Res*. 2005;15(8):1034-1050.  
1015 doi:10.1101/GR.3715005
- 1016 66. Lek M, Karczewski KJ, Minikel E v., et al. Analysis of protein-coding genetic variation in  
1017 60,706 humans. *Nature*. 2016;536(7616):285-291. doi:10.1038/nature19057
- 1018 67. Karczewski KJ, Francioli LC, Tiao G, et al. The mutational constraint spectrum quantified  
1019 from variation in 141,456 humans. *Nature*. 2020;581(7809):434-443.  
1020 doi:10.1038/s41586-020-2308-7
- 1021 68. Wang X, Goldstein DB. Enhancer Domains Predict Gene Pathogenicity and Inform Gene  
1022 Discovery in Complex Disease. *The American Journal of Human Genetics*.  
1023 2020;106(2):215-233. doi:10.1016/J.AJHG.2020.01.012
- 1024 69. Aguet F, Barbeira AN, Bonazzola R, et al. The GTEx Consortium atlas of genetic  
1025 regulatory effects across human tissues. *Science*. 2020;369(6509):1318.  
1026 doi:10.1126/SCIENCE.AAZ1776
- 1027 70. Kurki MI, Karjalainen J, Palta P, et al. FinnGen: Unique genetic insights from combining  
1028 isolated population and national health register data. *medRxiv*. Published online March 6,  
1029 2022:2022.03.03.22271360. doi:10.1101/2022.03.03.22271360



Sakaue et al

- 1030 71. Bycroft C, Freeman C, Petkova D, et al. The UK Biobank resource with deep phenotyping  
1031 and genomic data. *Nature*. 2018;562(7726):203-209. doi:10.1038/s41586-018-0579-z
- 1032 72. Dey KK, Gazal S, van de Geijn B, et al. SNP-to-gene linking strategies reveal contributions  
1033 of enhancer-related and candidate master-regulator genes to autoimmune disease. *Cell*  
1034 *Genomics*. 2022;2:100145. doi:10.1016/j.xgen.2022.100145
- 1035 73. Freund MK, Burch KS, Shi H, et al. Phenotype-Specific Enrichment of Mendelian Disorder  
1036 Genes near GWAS Regions across 62 Complex Traits. *The American Journal of Human*  
1037 *Genetics*. 2018;103(4):535-552. doi:10.1016/J.AJHG.2018.08.017
- 1038 74. Gate RE, Cheng CS, Aiden AP, et al. Genetic determinants of co-accessible chromatin  
1039 regions in activated T cells across humans. *Nature Genetics* 2018 50:8.  
1040 2018;50(8):1140-1150. doi:10.1038/s41588-018-0156-2
- 1041 75. Khetan S, Kursawe R, Youn A, et al. Type 2 Diabetes-Associated Genetic Variants  
1042 Regulate Chromatin Accessibility in Human Islets. *Diabetes*. 2018;67(11):2466-2477.  
1043 doi:10.2337/DB18-0393
- 1044 76. Alasoo K, Rodrigues J, Mukhopadhyay S, et al. Shared genetic effects on chromatin and  
1045 gene expression indicate a role for enhancer priming in immune response. *Nat Genet*.  
1046 2018;50(3):424. doi:10.1038/S41588-018-0046-7
- 1047 77. Currin KW, Erdos MR, Narisu N, et al. Genetic effects on liver chromatin accessibility  
1048 identify disease regulatory variants. *Am J Hum Genet*. 2021;108(7):1169-1189.  
1049 doi:10.1016/J.AJHG.2021.05.001
- 1050 78. Kumasaka N, Knights AJ, Gaffney DJ. Fine-mapping cellular QTLs with RASQUAL and  
1051 ATAC-seq. *Nature Genetics* 2015 48:2. 2015;48(2):206-213. doi:10.1038/ng.3467
- 1052 79. Chiou J, Geusz RJ, Okino ML, et al. Interpreting type 1 diabetes risk with genetics and  
1053 single-cell epigenomics. *Nature* 2021 594:7863. 2021;594(7863):398-402.  
1054 doi:10.1038/s41586-021-03552-w
- 1055 80. Mouri K, Guo MH, de Boer CG, et al. Prioritization of autoimmune disease-associated  
1056 genetic variants that perturb regulatory element activity in T cells. *Nature Genetics* 2022  
1057 54:5. 2022;54(5):603-612. doi:10.1038/s41588-022-01056-5
- 1058 81. Javierre BM, Sewitz S, Cairns J, et al. Lineage-Specific Genome Architecture Links  
1059 Enhancers and Non-coding Disease Variants to Target Gene Promoters. *Cell*.  
1060 2016;167(5):1369-1384.e19. doi:10.1016/J.CELL.2016.09.037

Sakaue et al

- 1061 82. Radtke F, Fasnacht N, MacDonald HR. Notch signaling in the immune system. *Immunity*.  
1062 2010;32(1):14-27. doi:10.1016/J.IMMUNI.2010.01.004
- 1063 83. Wei K, Korsunsky I, Marshall JL, et al. Notch signalling drives synovial fibroblast identity  
1064 and arthritis pathology. *Nature*. 2020;582(7811):259-264.  
1065 doi:10.1038/S41586-020-2222-Z
- 1066 84. Delacher M, Schmidl C, Herzig Y, et al. Rbpj expression in regulatory T cells is critical for  
1067 restraining TH2 responses. *Nature Communications 2019 10:1*. 2019;10(1):1-20.  
1068 doi:10.1038/s41467-019-09276-w
- 1069 85. Blake JA, Baldarelli R, Kadin JA, Richardson JE, Smith CL, Bult CJ. Mouse Genome  
1070 Database (MGD): Knowledgebase for mouse–human comparative biology. *Nucleic Acids*  
1071 *Res*. 2021;49(D1):D981. doi:10.1093/NAR/GKAA1083
- 1072 86. Uhlén M, Fagerberg L, Hallström BM, et al. Tissue-based map of the human proteome.  
1073 *Science (1979)*. 2015;347(6220).  
1074 doi:10.1126/SCIENCE.1260419/SUPPL\_FILE/1260419\_UHLEN.SM.PDF
- 1075 87. Hillier SG. Gonadotropic control of ovarian follicular growth and development. *Mol Cell*  
1076 *Endocrinol*. 2001;179(1-2):39-46. doi:10.1016/S0303-7207(01)00469-5
- 1077 88. Rubinstein WS, Maglott DR, Lee JM, et al. The NIH genetic testing registry: a new,  
1078 centralized database of genetic tests to enable access to comprehensive information and  
1079 improve transparency. *Nucleic Acids Res*. 2013;41(D1):D925-D935.  
1080 doi:10.1093/NAR/GKS1173
- 1081 89. Retterer K, Juusola J, Cho MT, et al. Clinical application of whole-exome sequencing  
1082 across clinical indications. *Genet Med*. 2016;18(7):696-704. doi:10.1038/GIM.2015.148
- 1083 90. Adams DR, Eng CM. Next-Generation Sequencing to Diagnose Suspected Genetic  
1084 Disorders. *N Engl J Med*. 2018;379(14):1353-1362. doi:10.1056/NEJMRA1711801
- 1085 91. Srivastava S, Love-Nichols JA, Dies KA, et al. Meta-analysis and multidisciplinary  
1086 consensus statement: exome sequencing is a first-tier clinical diagnostic test for  
1087 individuals with neurodevelopmental disorders. *Genet Med*. 2019;21(11):2413-2421.  
1088 doi:10.1038/S41436-019-0554-6
- 1089 92. Landrum MJ, Lee JM, Benson M, et al. ClinVar: improving access to variant interpretations  
1090 and supporting evidence. *Nucleic Acids Res*. 2018;46(D1):D1062-D1067.  
1091 doi:10.1093/NAR/GKX1153

Sakaue et al

- 1092 93. Glocker EO, Kotlarz D, Boztug K, et al. Inflammatory Bowel Disease and Mutations  
1093 Affecting the Interleukin-10 Receptor. *New England Journal of Medicine*.  
1094 2009;361(21):2033-2045.  
1095 doi:10.1056/NEJMOA0907206/SUPPL\_FILE/NEJM\_GLOCKER\_2033SA1.PDF
- 1096 94. Dietlein F, Wang AB, Fagre C, et al. Genome-wide analysis of somatic noncoding  
1097 mutation patterns in cancer. *Science (1979)*. 2022;376(6589).  
1098 doi:10.1126/SCIENCE.ABG5601/SUPPL\_FILE/SCIENCE.ABG5601\_MДАР\_REPRODU  
1099 CIBILITY\_CHECKLIST.PDF
- 1100 95. Connally N, Nazeen S, Lee D, et al. The missing link between genetic association and  
1101 regulatory function. *medRxiv*. Published online October 13, 2022:2021.06.08.21258515.  
1102 doi:10.1101/2021.06.08.21258515
- 1103 96. Donlin LT, Rao DA, Wei K, et al. Methods for high-dimensional analysis of cells dissociated  
1104 from cryopreserved synovial tissue. *Arthritis Res Ther*. 2018;20(1):1-15.  
1105 doi:10.1186/S13075-018-1631-Y/FIGURES/6
- 1106 97. Stuart T, Butler A, Hoffman P, et al. Comprehensive Integration of Single-Cell Data. *Cell*.  
1107 2019;177(7):1888-1902.e21. doi:10.1016/J.CELL.2019.05.031
- 1108 98. Korsunsky I, Millard N, Fan J, et al. Fast, sensitive and accurate integration of single-cell  
1109 data with Harmony. *Nature Methods 2019 16:12*. 2019;16(12):1289-1296.  
1110 doi:10.1038/s41592-019-0619-0
- 1111 99. Delaneau O, Marchini J, Zagury JF. A linear complexity phasing method for thousands of  
1112 genomes. *Nat Methods*. 2012;9(2):179-181. doi:10.1038/nmeth.1785
- 1113 100. Das S, Forer L, Schönherr S, et al. Next-generation genotype imputation service and  
1114 methods. *Nature Genetics 2016 48:10*. 2016;48(10):1284-1287. doi:10.1038/ng.3656
- 1115 101. Gibbs RA, Boerwinkle E, Doddapaneni H, et al. A global reference for human genetic  
1116 variation. *Nature*. 2015;526(7571):68-74. doi:10.1038/nature15393
- 1117 102. van der Auwera G, O'Connor B, Safari an OMCompany. *Genomics in the Cloud*.; 2020.  
1118 Accessed December 25, 2021.  
1119 <https://www.oreilly.com/library/view/genomics-in-the/9781491975183/>

1122 **Acknowledgments**

Sakaue et al

1123 We would like to sincerely thank participants of this study who provided tissue samples. We  
1124 thank Anika Gupta, Joyce Kang and Kaitlyn Lagattuta for their comments and helpful discussion  
1125 on the manuscript. This work is supported in part by funding from the National Institutes of  
1126 Health (R01AR063759, U01HG012009, UC2AR081023). S.S. was in part supported by the  
1127 Uehara Memorial Foundation and The Osamu Hayaishi Memorial Scholarship. K.W. is  
1128 supported by a Burroughs Wellcome Fund Career Awards for Medical Scientists, a Doris Duke  
1129 Charitable Foundation Clinical Scientist Development Award, and a Rheumatology Research  
1130 Foundation Innovative Research Award. We would like to thank the Brigham and Women's  
1131 Hospital Center for Cellular Profiling Single Cell Multomics Core for experimental design and  
1132 protocol optimization.

#### 1134 **Author Contributions**

1135 S.S. and S.R. conceived the work and wrote the manuscript with critical input from co-authors.  
1136 S.S. and K. Weinand analyzed the arthritis-tissue dataset and S.S. analyzed publicly available  
1137 datasets with help and guidance from K.K.D., K.J., M.K., A.M., A.L.P., and S.R. G.F.M.W., Z.Z.,  
1138 M.B.B., L.T.D., and K.Wei provided samples and generated the arthritis-tissue dataset.

#### 1140 **Competing Financial Interests**

1141 We declare no conflict of interest for this study. S.R. is a founder for Mestag, Inc, a scientific  
1142 advisor for Rheos, Janssen, and Pfizer, and serves as a consultant for Sanofi and Abbvie.
