1 **Tissue-specific enhancer-gene maps from multimodal single-cell data**  
2 **identify causal disease alleles**

3

4 Saori Sakaue<sup>1,2,3</sup>, Kathryn Weinand<sup>1,2,3,4</sup>, Shakson Isaac<sup>1,2,3,4</sup>, Kushal K. Dey<sup>3,5</sup>, Karthik  
5 Jagadeesh<sup>3,5</sup>, Masahiro Kanai<sup>3,6,7,8</sup>, Gerald F. M. Watts<sup>9</sup>, Zhu Zhu<sup>9</sup>, Accelerating Medicines  
6 Partnership® RA/SLE Program and Network, Michael B. Brenner<sup>9</sup>, Andrew McDavid<sup>10</sup>, Laura T.  
7 Donlin<sup>11,12</sup>, Kevin Wei<sup>9</sup>, Alkes L. Price<sup>3,5,13</sup>, Soumya Raychaudhuri<sup>1,2,3,4,\*</sup>

- 8 1. Center for Data Sciences, Brigham and Women's Hospital, Harvard Medical School, Boston, MA,  
9 USA
- 10 2. Divisions of Genetics and Rheumatology, Department of Medicine, Brigham and Women's  
11 Hospital, Harvard Medical School, Boston, MA, USA
- 12 3. Program in Medical and Population Genetics, Broad Institute of MIT and Harvard, Cambridge,  
13 MA, USA
- 14 4. Department of Biomedical Informatics, Harvard Medical School, Boston, MA, USA
- 15 5. Department of Epidemiology, Harvard T. H. Chan School of Public Health, Boston, MA, USA
- 16 6. Analytic and Translational Genetics Unit, Massachusetts General Hospital, Boston, MA, USA
- 17 7. Stanley Center for Psychiatric Research, Broad Institute of MIT and Harvard, Cambridge, MA,  
18 USA
- 19 8. Center for Computational and Integrative Biology, Massachusetts General Hospital, Boston, MA,  
20 USA
- 21 9. Division of Rheumatology, Inflammation, and Immunity, Department of Medicine, Brigham and  
22 Women's Hospital and Harvard Medical School, Boston, MA, USA
- 23 10. Department of Biostatistics and Computational Biology, University of Rochester Medical Center,  
24 Rochester, NY, USA
- 25 11. Hospital for Special Surgery, New York, NY, USA
- 26 12. Weill Cornell Medicine, New York, NY, USA
- 27 13. Department of Biostatistics, Harvard T. H. Chan School of Public Health, Boston, MA, USA

28

29 \*Address correspondence to:

30 Soumya Raychaudhuri

31 77 Avenue Louis Pasteur, Harvard New Research Building, Suite 250D

32 Boston, MA 02446, USA.

33 soumya@broadinstitute.org

34 617-525-4484 (tel); 617-525-4488 (fax)

35

36 **Abstract**

37 Translating genome-wide association study (GWAS) loci into causal variants and genes requires  
38 accurate cell-type-specific enhancer-gene maps from disease-relevant tissues. Building  
39 enhancer-gene maps is essential but challenging with current experimental methods in primary  
40 human tissues. We developed a new non-parametric statistical method, SCENT (Single-Cell  
41 ENhancer Target gene mapping) which models association between enhancer chromatin  
42 accessibility and gene expression in single-cell multimodal RNA-seq and ATAC-seq data. We  
43 applied SCENT to 9 multimodal datasets including > 120,000 single cells and created 23 cell-  
44 type-specific enhancer-gene maps. These maps were highly enriched for causal variants in  
45 eQTLs and GWAS for 1,143 diseases and traits. We identified likely causal genes for both  
46 common and rare diseases. In addition, we were able to link somatic mutation hotspots to target  
47 genes. We demonstrate that application of SCENT to multimodal data from disease-relevant  
48 human tissue enables the scalable construction of accurate cell-type-specific enhancer-gene  
49 maps, essential for defining non-coding variant function.

50

51 **Main**52 **Introduction**

53 Genome-wide association studies (GWAS) have comprehensively mapped loci for human  
54 diseases<sup>1-4</sup>. These loci harbor untapped insights about causal mechanisms that can point to  
55 novel therapeutics<sup>2,5</sup>. However, only rarely are we able to define causal variants or their target  
56 genes. Of the hundreds of associated variants in a single locus, only one or a few may be causal;  
57 others are associated since they tag causal variants<sup>2,6,7</sup>. Moreover, causal genes are also  
58 challenging to determine, since causal variants lie in non-coding regions in 90% of the time<sup>8-10</sup>,  
59 may regulate distant genes<sup>11-13</sup>, and may employ context-specific regulatory mechanisms<sup>14-17</sup>.

60 To define causal variants and genes, previous studies have used both statistical and  
61 experimental approaches. Statistical fine-mapping<sup>18-23</sup> can narrow the set of candidate causal  
62 variants, and is more effective when GWAS includes diverse ancestral backgrounds with  
63 different allele frequencies and linkage disequilibrium structures (LD)<sup>24-28</sup>. However, these  
64 approaches alone are seldom able to identify true causal variants with confidence<sup>7,23,29-32</sup>. To  
65 define causal genes, previous studies have built enhancer-gene maps, that can be used to  
66 prioritize causal variants in enhancers and link causal variants to genes they regulate. These  
67 maps often require large-scale epigenetic and transcriptomic atlases (e.g., Roadmap<sup>33</sup>,  
68 BLUEPRINT<sup>34</sup>, and ENCODE<sup>35</sup>). The enhancer-gene maps have been built from these atlases  
69 by correlating epigenetic activity (i.e., enhancer activity; e.g., histone mark ChIP-seq and bulk  
70 ATAC-seq) with gene expression (e.g., RNA-seq)<sup>36,37</sup>, by combining epigenetic activity and  
71 probability of physical contact with the gene<sup>38,39</sup>, or by integrating multiple linking strategies to  
72 create composite scores<sup>40</sup>. However, current methods largely use bulk tissues or cell lines. Bulk

73 data potentially (i) cannot be easily applied to rare cell populations (ii) obscures the cell-type-  
74 specific nature of gene regulation and (iii) requires hundreds of experimentally characterized  
75 samples, necessitating consortium-level efforts. While perturbation experiments (e.g., CRISPR  
76 interference<sup>41</sup> or base editing<sup>42</sup>) can point to causal links between enhancers and genes, they  
77 are difficult to scale because they require the cell- or tissue-type specific experimental  
78 protocols<sup>43</sup>.

79 Advances in single-cell technologies offer new opportunities for building cell-type specific  
80 enhancer-gene maps. Multimodal protocols now enable joint capture of epigenetic activity by  
81 ATAC-seq alongside early transcriptional activity with nuclear RNA-seq<sup>44-48</sup>. These methods  
82 are easily applied at scale to cells in human primary tissues without disaggregation, enabling  
83 query of many samples from disease-relevant tissues. If we establish accurate links between  
84 open chromatin enhancers and genes in single cells, statistical power should exceed bulk-tissue-  
85 based methods since each observation is at a cell-level resolution. However, the sparse and  
86 non-parametric nature of RNA-seq and ATAC-seq in single-cell experiments makes confident  
87 identification of these links challenging. To date, most methods use linear regression models to  
88 link enhancers and genes (e.g., ArchR<sup>49</sup> and Signac<sup>50</sup>) despite these features or only utilize co-  
89 accessibility of regulatory regions from ATAC-seq but not gene expression from sc-RNA-seq  
90 (e.g., Cicero<sup>51</sup>). These previous methods have not generally demonstrated efficacy in practice  
91 for causal variant fine-mapping in complex traits.

92 In this context, we developed Single-Cell Enhancer Target gene mapping (SCENT), to  
93 accurately map enhancer-gene pairs where an enhancer's activity (i.e. peak accessibility) is

94 associated with gene expression across individual single cells. We use Poisson regression and  
95 non-parametric bootstrapping<sup>52</sup> to account for the sparsity and non-parametric distributions. We  
96 predicted that peaks with gene associations are more likely to be functionally important. We  
97 apply SCENT to 9 multimodal datasets to build 23 cell-type specific enhancer-gene maps. We  
98 show that SCENT enhancers are highly enriched in statistically fine-mapped likely causal  
99 variants for eQTL and GWAS. We use SCENT enhancer-gene map to define causal variants,  
100 genes, and cell types in common and rare disease loci and somatic mutation hotspots, which  
101 has not been previously demonstrated by conventional enhancer-gene mapping based on bulk-  
102 tissues.

103

## 104 **Results**

### 105 *Overview of SCENT*

106 To identify (1) active *cis*-regulatory regions and (2) their target genes (3) in a given cell type, we  
107 leveraged single-cell multimodal datasets. SCENT accurately identifies significant association  
108 between chromatin accessibility of regulatory regions (i.e., peaks) from ATAC-seq and gene  
109 expression from RNA-seq across individual single cells (**Figure 1a**). Those associations can be  
110 used for prioritizing (1) likely causal variants if they are in regulatory regions that are associated  
111 with gene expression, (2) likely causal genes if they are associated with the identified regulatory  
112 region and (3) the critical cell types based on which map the association is identified in. We  
113 assessed whether binarized chromatin accessibility in an ATAC peak is associated with gene  
114 expression counts in *cis* (< 500kb from gene body), testing one peak-gene pair at a time in each

115 cell type (see **Methods**). We tested each cell type separately to capture cell-type-specific gene  
 116 regulation and to avoid spurious peak-gene associations due to gene co-regulation across cell  
 117 types.

118 Since both RNA-seq and ATAC-seq data are generally sparse<sup>50,53–56</sup>, we used Poisson  
 119 regression since it was a simple model that has been used effectively for sc-RNA-seq  
 120 analysis<sup>54,57</sup>.

$$E_i \sim \text{Poisson}(\lambda_i)$$

$$\log(\lambda_i) = \beta_0 + \beta_{peak}X_{peak} + \beta_{\%mito}X_{\%mito} + \beta_{nUMI}X_{nUMI} + \beta_{batch}X_{batch}$$

123 where  $E_i$  is the observed expression count of  $i$ th gene, and  $\lambda_i$  is the expected count under  
 124 Poisson distribution.  $\beta_{peak}$  indicates the effect of chromatin accessibility of a peak on  $i$  th gene  
 125 expression (see **Methods**) and reflects the strength of the regulatory effect and sign (i.e.,  
 126 enhancing vs. silencing effect). We accounted for donor or batch effects ( $X_{batch}$ ) and cell-level  
 127 technical factors such as percentage of mitochondrial reads ( $X_{\%mito}$ ).

128 However, gene expression counts are highly variable across genes (**Figure 1b**;  
 129 **Supplementary Figure 1a**), and Poisson regression might be suboptimal for highly expressed  
 130 and dispersed genes. Consequently, we observed inflated statistics when we permuted cell  
 131 barcodes to disrupt association between ATAC and RNA profiles (**Supplementary Figure 1b**).  
 132 Common analytical statistical models (e.g., linear, negative binomial and Poisson regression) all  
 133 demonstrated inflated statistics (**Supplementary Figure 1c-e**). Therefore, to accurately  
 134 estimate the error and significance of  $\beta_{peak}$ , we implemented non-parametric bootstrapping  
 135 framework. Briefly, we resampled cells with replacement from the full data and re-estimated

136  $\beta'_{peak}$  up to 50,000 times. We compared this empirical distribution of  $\beta'_{peak}$  against null  
137 hypothesis ( $\beta'_{peak} = 0$ ) to derive the significance of  $\beta_{peak}$  (i.e., two-sided bootstrapping-based  
138  $P$  value; see **Methods, Supplementary Figure 2**). The Poisson regression followed by  
139 bootstrapping resulted in well-calibrated statistics with appropriate type I error (**Supplementary**  
140 **Figure 1f**).

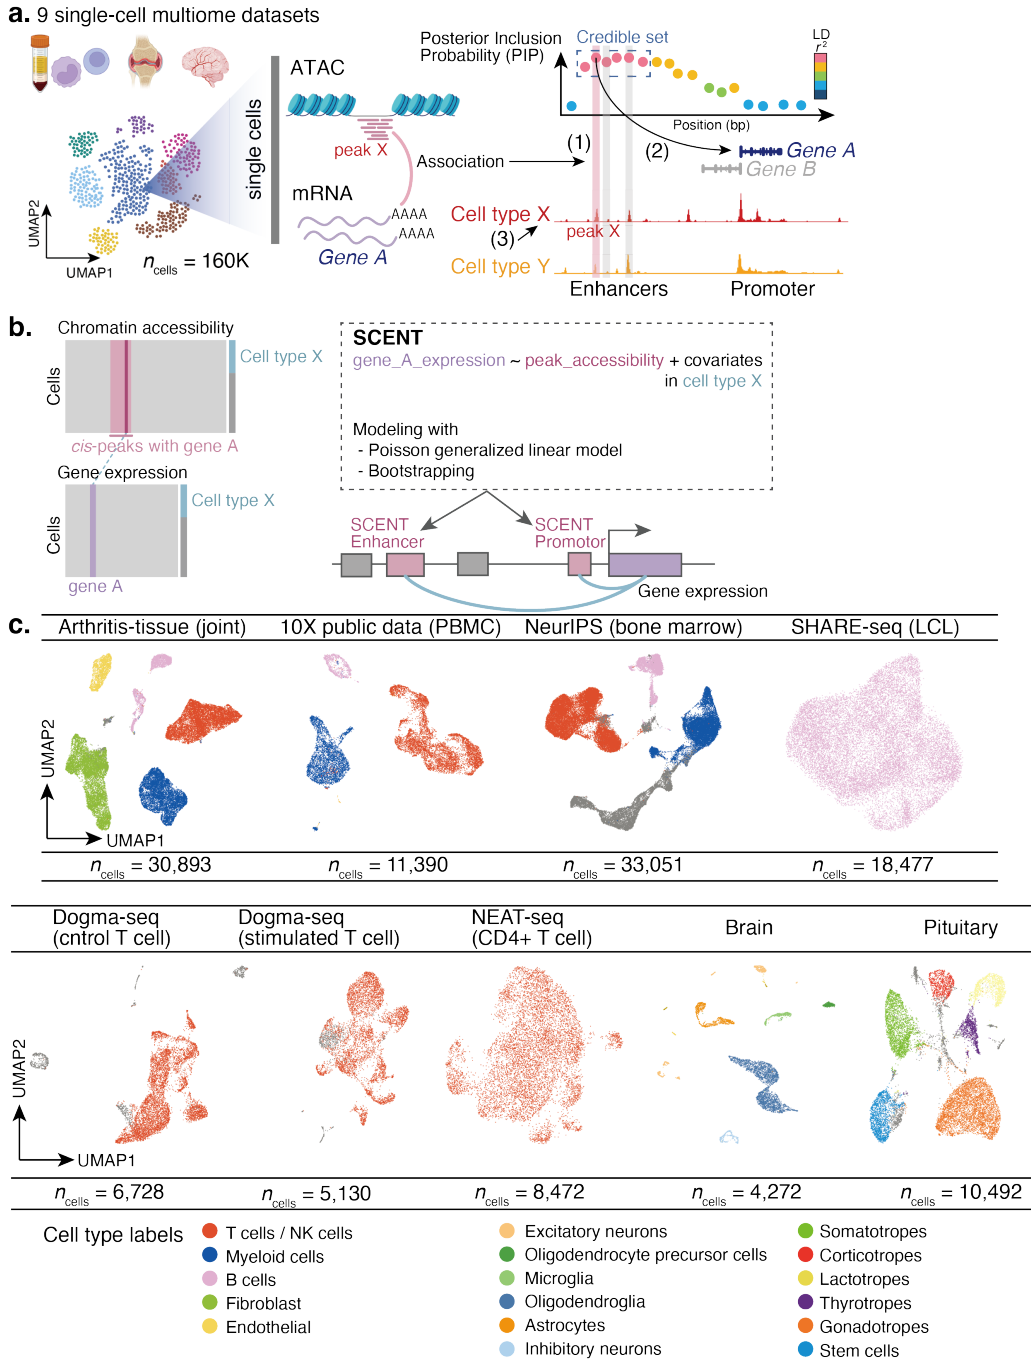

141

142

143

144

145

146

147

148

149

**Figure 1. Schematic overview of SCENT and SCENT enhancer-gene pairs across 9 single-cell multimodal datasets.** **a.** SCENT identifies (1) active *cis*-regulatory regions and (2) their target genes in (3) a specific cell type. Those SCENT results can be used to define likely causal variants, genes, and cell types for GWAS loci. **b.** SCENT models association between chromatin accessibility from ATAC-seq and gene expression from RNA-seq across individual cells in a given cell type. **c.** 9 single-cell datasets on which we applied SCENT to create 23 cell-type-specific enhancer-gene map. The cells in each dataset are described in UMAP embeddings from RNA-seq and colored by cell types.



150 *Discovery of cell-type-specific SCENT enhancer-gene links*

151 We obtained nine single-cell multimodal datasets from diverse human tissues representing 13  
152 cell-types (immune-related, hematopoietic, neuronal, and pituitary). Since we are interested in  
153 autoimmune diseases, we newly generated an inflammatory tissue dataset by obtaining inflamed  
154 synovial tissues from ten rheumatoid arthritis (RA) and two osteoarthritis (OA) patients (arthritis-  
155 tissue dataset;  $n_{\text{donor}} = 12$ ). Applying stringent QC to these multimodal data, we obtained  
156 information on 30,893 cells (see **Methods**). In addition, we obtained eight public datasets with  
157 129,672 cells. In total we had data from 160,565 cells<sup>46,58-62</sup>. We analyzed 16,621 genes and  
158 1,193,842 open chromatin peaks in *cis* after QC (4,753,521 peak-gene pairs, 28 median peaks  
159 per gene; **Figure 1c, Supplementary Figure 3, Supplementary Table 1**). After clustering cells  
160 and cell type annotation, we applied SCENT individually to each of the cell types with  $n_{\text{cells}} > 500$   
161 to construct 23 enhancer-gene maps. SCENT identified 87,648 cell-type-specific peak-gene  
162 links (false discovery rate (FDR) < 10%, **Figure 2a, Supplementary Figure 4**). Each gene had  
163 variable number of associated peaks in *cis* (from 0 to 97, mean = 4.13, **Supplementary Figure**  
164 **5a**).

165 To assess replicability of SCENT peak-gene links, we compared the effects from the  
166 arthritis-tissue dataset (discovery; which had the largest number of significant peak-gene pairs)  
167 with those from other datasets in the same cell-type (replication) in B cells, T/NK cells and  
168 myeloid cells (**Supplementary Table 2a**). Despite different tissue contexts, we confirmed high  
169 directional concordance of the effect of chromatin accessibility on gene expression for peak-  
170 gene pairs significant in both datasets (mean Pearson  $r = 0.62$  of effect sizes, 99% mean

171 concordance across all the datasets: **Supplementary Figure 5b**). For comparison, we tested  
172 two popular linear parametric single-cell multimodal methods that are already published, namely  
173 ArchR<sup>56</sup> or Signac<sup>50</sup>. Using arthritis-tissue dataset as a discovery and public PBMC as a  
174 replication, we noted lower directional concordance and effect correlation in these methods than  
175 in SCENT (mean Pearson's  $r = 0.31$ , 62% mean directional concordance in ArchR and  $r = 0.24$ ,  
176 98% mean directional concordance in Signac; **Supplementary Table 2b** and **c**). These results  
177 argue that SCENT can more reproducibly detect enhancer-gene links compared with previous  
178 parametric methods for single-cell multimodal data.

179

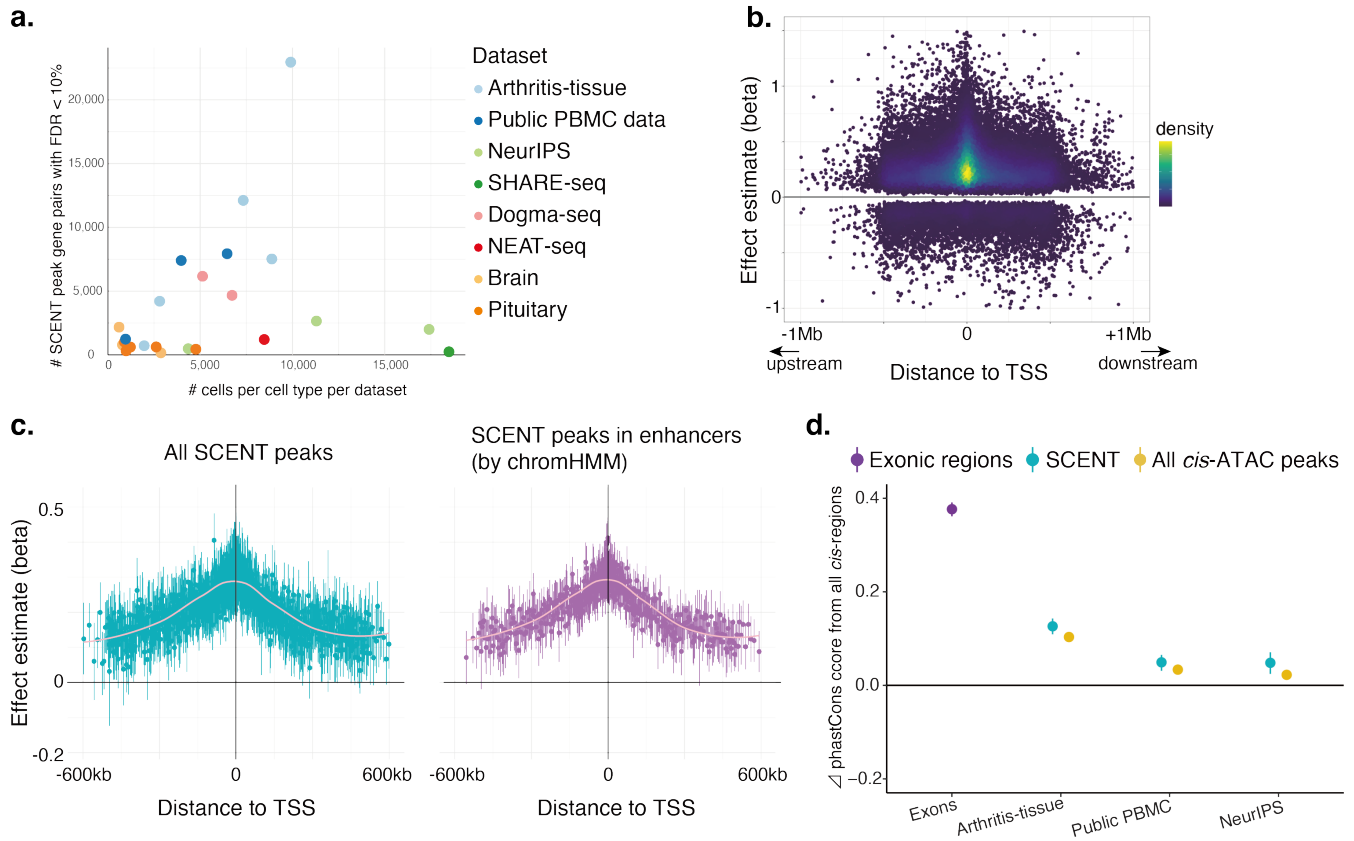

180  
181  
182  
183  
184  
185  
186  
187  
188  
189  
190  
191  
192  
193  
194  
195

**Figure 2. SCENT identified functionally active and evolutionary conserved *cis*-regulatory regions from single-cell multimodal data.**

**a.** The number of significant gene-peak pairs discovered by SCENT with FDR < 10%. Each dot represents the number of significant gene-peak pairs in a given cell type in a dataset (y-axis) as a function of the number of cells in each cell type in a dataset (x-axis), colored by the dataset.

**b.** The effect size (beta) of chromatin accessibility on the gene expression from Poisson regression (y-axis). Each dot is a significant gene-peak pair and plotted against the distance between the peak and the transcription start site (TSS) of the gene, colored as a density plot.

**c.** The mean effect size (beta) of chromatin accessibility on the gene expression in arthritis-tissue dataset within each bin of TSS distance. Left; all significant gene-peak links. Right; SCENT peaks within enhancers identified using chromHMM in immune-related tissues.

**d.** Mean phastCons score difference ( $\Delta$  phastCons score) between each annotated region and all *cis*-regulatory non-coding regions. We show the  $\Delta$  phastCons score for exonic regions (purple) as a reference, and for SCENT (green) and all *cis*-ATAC peaks (yellow) enhancers in each multimodal dataset.

196 To assess if SCENT peaks (i.e., *cis*-regulatory regions) were functional, we examined if  
197 (1) they co-localized with conventional *cis*-regulatory annotation, (2) their effect on expression  
198 was greater for closer peak-gene pairs, (3) they had high sequence conservation, and (4) peak-  
199 gene connections were more likely to be validated experimentally.

200 First, we tested the overlap of SCENT peaks with an ENCODE cCRE<sup>63</sup>, a conventional  
201 *cis*-regulatory annotation by bulk epigenomic datasets. We observed that 98.0% of the SCENT  
202 peaks overlapped with ENCODE cCRE on average, compared to 23.3% of random *cis*-regions  
203 matched for size and 89.0% of non-SCENT peaks (**Supplementary Figure 5c**).

204 Second, we examined the strength of enhance-gene links, hypothesizing that stronger  
205 links would be more proximal to the transcription start site (TSS) of target genes. The regression  
206 coefficient  $\beta_{peak}$  (the effect size of peak accessibility on gene expression) became larger and  
207 more positive as the SCENT peaks got closer to the TSS (**Figure 2b** and **Figure 2c**, left panel),  
208 consistent with previous observations<sup>56,64</sup>. We annotated SCENT peaks with 18-state  
209 chromHMM results from 41 immune-related samples in ENCODE consortium<sup>37</sup>. When we subset  
210 peaks to those within enhancer annotations, we observed a clearer decay in  $\beta_{peak}$  as a function  
211 of TSS distance (**Figure 2c**, right panel).

212 Third, we assessed whether SCENT peaks had higher sequence conservation across  
213 species, quantified as phastCons score<sup>66</sup>, which should indicate functional importance; the  
214 evolutionary conserved regulatory regions are known to be enriched for complex trait  
215 heritability<sup>65</sup>. As expected, exonic regions were much more evolutionary conserved than all non-  
216 coding *cis*-region (mean  $\Delta$  phastCons score = 0.38, paired t-test  $P < 10^{-323}$ ; **Figure 2d**, purple).

217 The SCENT regulatory regions were also conserved relative to non-coding *cis*-regions (mean  $\Delta$   
218 phastCons score = 0.13, paired t-test  $P = 4.2 \times 10^{-42}$  in arthritis-tissue dataset; **Figure 2d**, green).  
219 In contrast, the  $\Delta$  phastCons score between all *cis*-ATAC peaks and all non-coding *cis*-region  
220 was more modest (mean  $\Delta$  phastCons score = 0.092, paired t-test  $P = 8.7 \times 10^{-27}$  in arthritis-  
221 tissue dataset; **Figure 2d**, yellow). To test if the higher conservation in SCENT peaks were  
222 driven by their proximity to TSS (**Supplementary Figure 6a**), we matched each of the SCENT  
223 peak-gene pairs to one non-SCENT peak-gene pair that had the most similar TSS distance  
224 (**Supplementary Figure 6b**). We assessed  $\Delta$  phastCons score between SCENT peaks and  
225 non-SCENT peaks with matching peaks on TSS distance. SCENT peaks had significantly higher  
226 conservation scores than the non-SCENT peaks with the matched TSS distance (mean  $\Delta$   
227 phastCons score = 0.034,  $P = 4.7 \times 10^{-4}$  in arthritis-tissue dataset; **Supplementary Figure 5d**;  
228 see **Methods**). The higher sequence conservation suggested the functional importance of  
229 SCENT regulatory regions not solely driven by TSS proximity.

230 Finally, we tested whether the target genes from SCENT were enriched for experimentally  
231 confirmed enhancer-gene links. We used Nasser et al.<sup>39</sup> CRISPR-Flow FISH results which  
232 included 278 positive enhancer-gene connections and 5,470 negative connections. The SCENT  
233 peaks were >4-fold enriched relative to non-SCENT peaks for positive connections (Fisher's  
234 exact OR=4.5X,  $P=1.8 \times 10^{-9}$  in arthritis-tissue dataset and 4.5X,  $P=1.0 \times 10^{-8}$  in public PBMC  
235 dataset; **Methods, Supplementary Table 3**).

236 We anticipate that the genes with the largest number of SCENT peaks are likely to be the  
237 most constraint and least tolerant to loss of function mutations. The genes with the most SCENT

238 peaks included *FOSB* ( $n = 97$ ), *JUNB* ( $n = 95$ ), and *RUNX1* ( $n = 77$ ), critical and highly conserved  
239 transcription factors. We used mutational constraint metrics based on the absence of deleterious  
240 variants within human populations (i.e., the probability of being loss-of-function intolerant (pLI)<sup>67</sup>  
241 and the loss-of-function observed/expected upper bound fraction (LOEUF)<sup>68</sup>). The normalized  
242 number of SCENT peaks per gene is strongly associated with mean constraint score for the  
243 gene (beta=0.37,  $P=4.9 \times 10^{-90}$  for pLI where higher score indicates more constraint, and beta=-  
244 0.35,  $P=-0.35 \times 10^{-106}$  for LOEUF where lower score indicates more constraint; **Supplementary**  
245 **Figure 7a** and **7b**, respectively). Previously, genes with many regulatory regions from bulk-  
246 epigenomic data had been shown to be enriched for loss-of-function intolerant genes<sup>69</sup>. We  
247 replicated the same trend in the single-cell multimodal datasets and SCENT.

#### 248

#### 249 *Enrichment of eQTL putative causal variants in SCENT peaks*

250 We examined whether the SCENT peaks are likely to harbor statistically fine-mapped putative  
251 causal variants for expression quantitative loci (eQTL). We used tissue-specific eQTL fine-  
252 mapping results from GTEx across 49 tissues<sup>70</sup> and defined any variants with posterior inclusion  
253 probability (PIP) > 0.2 as putative causal variants. We computed enrichment statistics within  
254 ATAC peaks or SCENT peaks (see **Methods**). Unsurprisingly, all the accessible regions defined  
255 by ATAC-seq in *cis*-regions were modestly enriched in fine-mapped variants by 2.7X (yellow,  
256 **Figure 3a**). However, SCENT peaks were more strikingly enriched in fine-mapped variants by  
257 9.6X on average across all datasets (green, **Figure 3a**). Using more stringent PIP threshold

258 cutoffs (0.5 and 0.7) to define putative causal variants resulted in even stronger enrichments  
259 (**Supplementary Figure 8**).

260         Since many SCENT peaks are close to TSS regions, we again considered whether this  
261 enrichment might be driven by TSS proximity (**Supplementary Figure 6a**). To test this, we  
262 compared the fine-mapped variant enrichment between SCENT and non-SCENT peak-gene  
263 pairs with matched TSS distance (**Supplementary Figure 6b**). The SCENT peaks consistently  
264 had higher enrichment in all analyzed datasets (**Supplementary Figure 9a**) than TSS-  
265 distance-matched non-SCENT peaks (e.g., 12.3X in SCENT vs. 9.64X in distance-matched  
266 non-SCENT in arthritis-tissue dataset). This suggests that SCENT has additional information in  
267 identifying functional *cis*-regulatory regions beyond TSS distance.

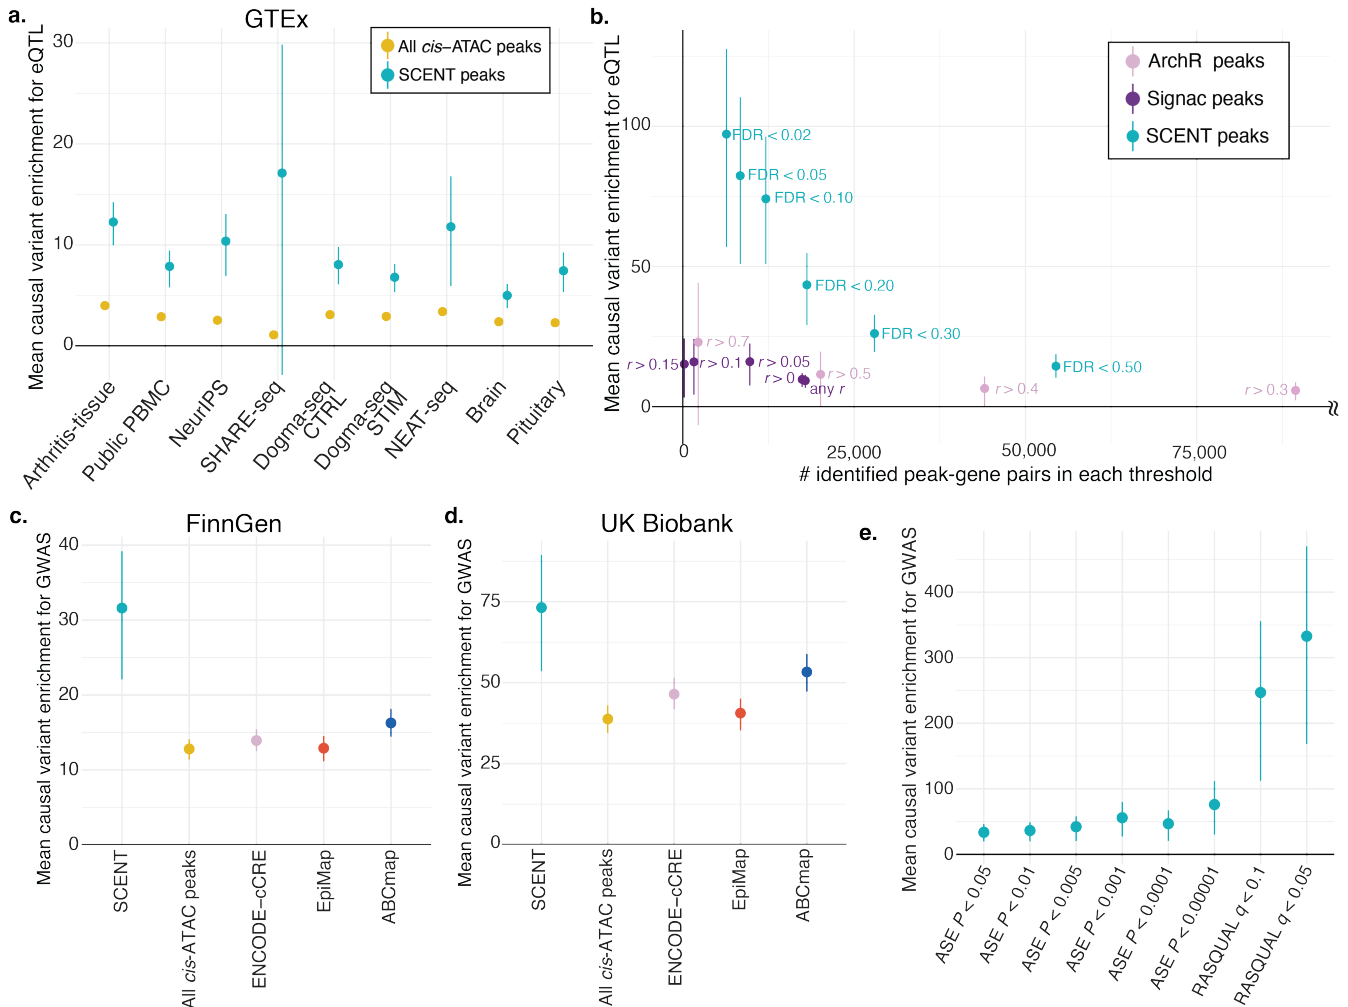

268  
 269  
 270  
 271  
 272  
 273  
 274  
 275  
 276  
 277  
 278  
 279  
 280  
 281  
 282

**Figure 3. SCENT enhancers are enriched in putative causal variants of eQTL and GWAS.** **a.** The mean causal variant enrichment for eQTL within SCENT peaks or all ATAC-seq peaks in each of the 9 single-cell datasets. The bars indicate 95% confidence intervals by bootstrapping genes. **b.** Comparison of the mean causal variant enrichment for eQTL (y-axis) between SCENT (green), ArchR (pink), and Signac (purple) as a function of the number of significant peak-gene pairs at each threshold of significance. The bars indicate 95% confidence intervals by bootstrapping genes. The ArchR results with > 100,000 peak-gene linkages are omitted, and full results are in **Supplementary Figure 9b**. **c** and **d.** The mean causal variant enrichment for GWAS within SCENT enhancers (green), all *cis*-ATAC peaks (yellow), ENCODE cCREs (pink), EpiMap enhancers across all groups (red) and ABC enhancers across all samples (blue). GWAS results were based on FinnGen (**c**) and UK Biobank (**d**). The bars indicate 95% confidence intervals by bootstrapping traits. **e.** The mean causal variant enrichment for FinnGen GWAS within intersection of SCENT enhancers and caQTL enhancers at each threshold of significance. The bars indicate 95% confidence intervals by bootstrapping traits.



283 We next compared the enrichment for eQTL putative causal variants in SCENT peaks to  
284 peaks identified by the two published linear parametric methods using single-cell multimodal  
285 data, ArchR<sup>56</sup> and Signac<sup>50</sup> using the same dataset. ArchR and Signac peaks had substantially  
286 lower causal variant enrichment for eQTL (1.4X and 9.3X, respectively) compared to SCENT  
287 peaks (74.1X) with FDR<0.10. We were concerned that this performance differences may reflect  
288 variable recall; that is SCENT may be more restrictive and calling fewer peaks. By varying the  
289 thresholds to define significant peak-gene associations (see **Methods**), we called the number of  
290 peak-gene pairs with difference levels of stringency and tested causal variant enrichment (i.e.,  
291 recall-precision tradeoff; **Figure 3b** and **Supplementary Figure 9b**). SCENT peaks consistently  
292 demonstrated higher causal variant enrichment (i.e., precision) than ArchR and Signac peaks  
293 across different recall values.

294 We also tested Cicero<sup>51</sup>, which is a published linear parametric method for detecting  
295 promoter-enhancer co-accessibility from ATAC-seq data alone. We confirmed that SCENT  
296 peaks demonstrated higher causal variant enrichment than Cicero using the same dataset but  
297 only with ATAC-seq side (**Supplementary Figure 9c**; see **Methods**).

298 We assessed whether the Poisson regression or the bootstrapping in SCENT was driving  
299 its performance over other linear parametric methods. We benchmarked causal variant  
300 enrichment in SCENT peaks against peaks identified with only Poisson regression but without  
301 non-parametric bootstrapping (see **Methods**). As previously mentioned, we already observed  
302 false positive associations in the simulated null datasets in the Poisson-only strategy  
303 (**Supplementary Figure 1c**). Indeed, we observed substantially lower causal variant enrichment

304 at a given recall compared to SCENT (14.4X in Poisson only vs. 74.1X in SCENT at the same  
305 FDR<0.10), albeit slightly higher than the linear methods ArchR and Signac (**Supplementary**  
306 **Figure 9c**). This underscored the importance of accounting for both (1) sparsity by Poisson  
307 regression and (2) highly variable gene count distribution by non-parametric bootstrapping to  
308 achieve high precision in SCENT.

309 SCENT can detect *cis*-regulatory regions in a cell-type-specific manner. We created cell-  
310 type-specific enhancer-gene maps in four major cell types with > 5,000 cells across datasets;  
311 for each cell type we took the union of SCENT enhancers across datasets. The cell-type-specific  
312 SCENT enhancers (e.g., SCENT B cell peaks) were most enriched in putative causal eQTL  
313 variants within relevant samples in GTEx (e.g., EBV-transformed lymphocytes; **Supplementary**  
314 **Figure 9d**).

315 These results suggest that SCENT can prioritize regulatory elements harboring putative  
316 causal eQTL variants in a cell-type-specific manner, with higher precision than the previous  
317 single-cell methods.

318

### 319 *Enrichment of likely causal variants for GWAS in SCENT enhancers*

320 SCENT applied for multimodal data from disease-relevant tissues can build disease-specific  
321 enhancer-gene maps. We sought to examine whether SCENT peaks can be used for the more  
322 difficult task of prioritizing disease causal variants. We obtained candidate causal variants for  
323 diseases and traits from fine-mapping results of GWASs in two large-scale biobanks (PIP>0.2;  
324 FinnGen<sup>71</sup> [1,046 disease traits] and UK Biobank<sup>72</sup> [35 binary traits and 59 quantitative traits])<sup>28</sup>.

325 We computed enrichment statistics for causal GWAS variants within SCENT enhancers (both  
326 cell-type-specific tracks and aggregated tracks across cell types; see **Methods**). The SCENT  
327 enhancers were strikingly enriched in causal GWAS variants in FinnGen (31.6X on average;  
328 1046 traits; **Figure 3c** and **Supplementary Figure 10a**) and UK Biobank (73.2X on average; 94  
329 traits; **Figure 3d** and **Supplementary Figure 10b**). This enrichment was again much larger than  
330 all *cis*-ATAC peaks (12.8X in FinnGen and 38.8X in UK Biobank). Moreover, the target genes of  
331 the likely causal variants for autoimmune diseases (AID) identified by SCENT peaks in immune-  
332 related cell types had higher fraction (10.8%) of known genes implicated in Mendelian disorders  
333 of immune dysregulation ( $n_{\text{gene}} = 550$ )<sup>73,74</sup> than SCENT peaks in fibroblast (3.8%;  
334 **Supplementary Figure 10c**).

335 We compared SCENT to alternative genome annotations and enhancer-gene maps from  
336 bulk tissues. Causal variant enrichment in SCENT was much higher than the conventional bulk-  
337 based annotations such as ENCODE cCREs (13.9X in FinnGen and 46.5X in UK Biobank), ABC  
338 (16.3X in FinnGen and 53.3X in UK Biobank) and EpiMap (12.9X in FinnGen and 40.6X in UK  
339 Biobank; **Figure 3c** and **3d** [aggregated tracks], **Supplementary Figure 10a** and **10b** [cell-type-  
340 specific tracks]). We again assessed recall and precision tradeoffs by varying thresholds for  
341 defining significant peak-gene linkages. We constructed SCENT from 9 datasets and 23 cell  
342 types with only 28 samples, substantially less than the 833 samples and tissues used to  
343 construct EpiMap and 131 samples and cell lines for the ABC model. Despite the smaller data  
344 set, SCENT peaks consistently demonstrated higher precision (i.e., enrichment of causal GWAS  
345 variants) at a given recall (i.e., a similar number of identified peak-gene linkages) than ABC

346 model and EpiMap (**Supplementary Figure 11a**). A more stringent PIP threshold (0.5 and 0.7)  
347 for putative causal variants increased the enrichment while maintaining the higher enrichment in  
348 SCENT than bulk methods (**Supplementary Figure 11b**). The target genes for AID by SCENT  
349 in immune-related cell types had higher fraction (10.8%) of known Mendelian genes of immune  
350 dysregulation<sup>73,74</sup> than EpiMap (8.6%) and ABC model (4.4%) (**Supplementary Figure 10c**).  
351 These results demonstrate the power SCENT achieved by accurately modeling association  
352 between chromatin accessibility and gene expression at the single-cell resolution.

353 We hypothesized that putative causal variants by SCENT would likely modulate  
354 chromatin accessibility (e.g., transcription factor binding affinity). If so, the intersection of the  
355 SCENT enhancers and chromatin accessibility quantitative trait loci (caQTL) could further enrich  
356 the causal GWAS variants<sup>75-78</sup>, because these intersected enhancers should include genetic  
357 variants that directly change both chromatin accessibility and gene expression. To test this  
358 hypothesis, we used single-cell ATAC-seq samples with genotype ( $n_{\text{donor}} = 17$ ; arthritis-tissue  
359 dataset) and performed caQTL mapping by leveraging allele-specific (AS) chromatin  
360 accessibility (binomial test followed by meta-analysis across donors) or by combining AS with  
361 inter-individual differences (RASQUAL<sup>79</sup>). We then intersected the caQTL ATAC peaks with the  
362 SCENT enhancers and calculated the causal variant enrichment within these intersected regions.  
363 We observed higher enrichment within intersected regions with SCENT and caQTL than those  
364 with SCENT alone. The enrichment increased as we used more stringent threshold for caQTL  
365 peaks, reaching as high as 333-fold when compared with background *cis*-regions (**Figure 3e**).  
366 Thus, SCENT efficiently prioritized causal GWAS variants in part by capturing regulatory regions

367 of which chromatin accessibility is perturbed by genetic variants and modulates gene expression.  
368 SCENT demonstrated a potential to further enrich causal variants by caQTLs if multimodal data  
369 has matched genotype data.

370

### 371 *Defining mechanisms of GWAS loci by SCENT*

372 We finally sought to use SCENT enhancer-gene links to define disease causal mechanisms. We  
373 analyzed the fine-mapped variants from GWASs (FinnGen, UK Biobank and GWAS cohorts of  
374 rheumatoid arthritis (RA)<sup>26</sup>, inflammatory bowel disease<sup>29</sup> and type 1 diabetes (T1D)<sup>80</sup>). SCENT  
375 linked 4,124 putative causal variants (PIP>0.1) to their potential target genes across 1,143 traits  
376 (**Supplementary Table 4**). These target genes were mostly close to the causal variant, with  
377 20% of them being the closest gene to the causal variant (**Supplementary Figure 12a** and **12b**;  
378 see **Methods**). However, 30.6% of the time SCENT linked causal variants to genes more than  
379 300 kb away.

380 We first focus on autoimmune loci, given that our current SCENT tracks are largely  
381 derived from immune cell types. We prioritized a single well fine-mapped variant rs72928038  
382 (PIP > 0.3) at 6q15 locus in multiple autoimmune diseases (RA, T1D, atopic dermatitis and  
383 hypothyroidism), within the T-cell-specific SCENT enhancer (T cells in Public PBMC and  
384 Dogma-seq datasets; **Figure 4a**). This enhancer was linked to *BACH2*, which was also the  
385 closest gene to this fine-mapped variant. Notably, base-editing in T cells has confirmed that this  
386 variant affects *BACH2* expression<sup>81</sup>. Moreover, editing of this variant into CD8 T cells skewed  
387 naive T cells toward effector T cell fates<sup>81</sup>.

388

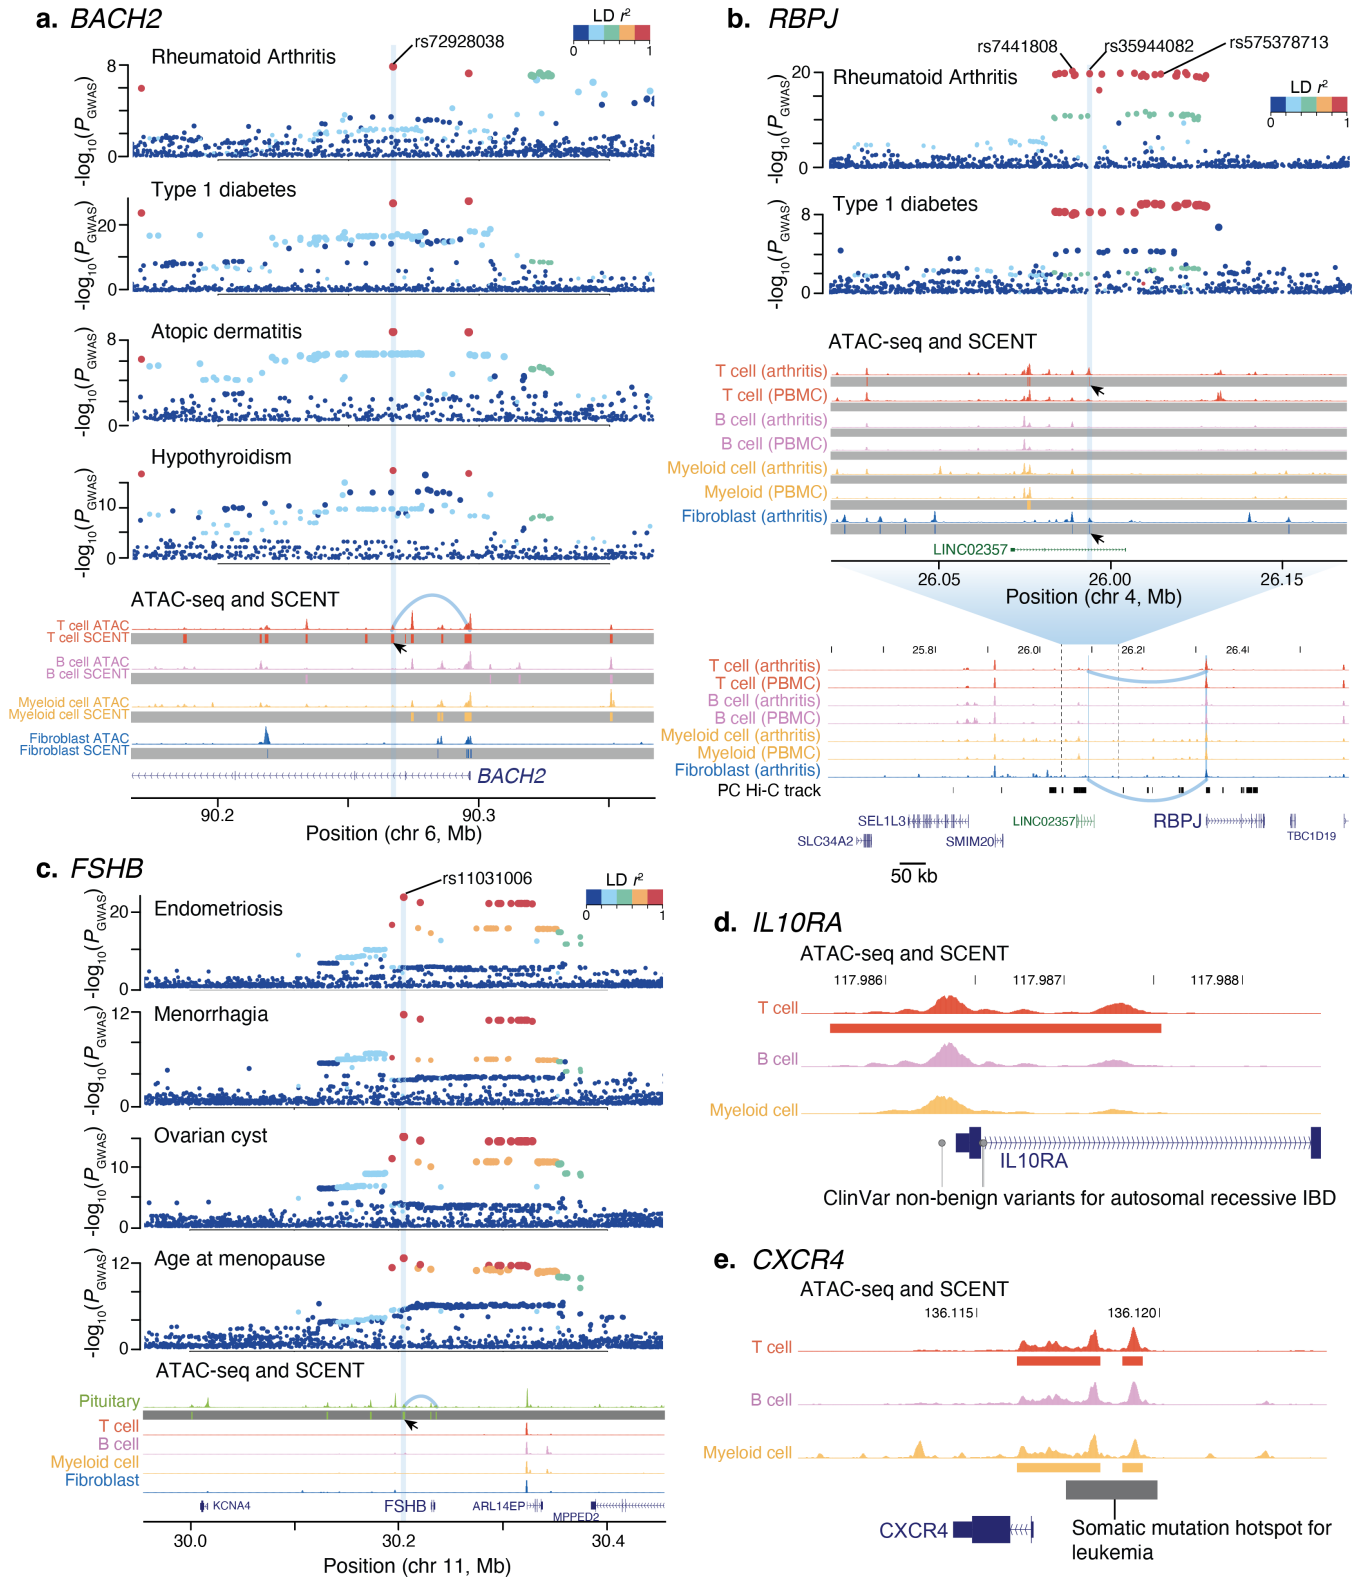

389

390

391

392

**Figure 4. SCENT defined causal variants and genes in complex trait GWAS.**

**a.** Rs72928038 at *BACH2* locus was prioritized by T-cell-specific SCENT enhancer-gene map, being for RA, T1D, Atopic dermatitis and hypothyroidism. The top four panels are GWAS regional

393 plots, with x-axis representing the position of each genetic variant. The color of the dots  
394 represent LD  $r^2$  from the prioritized variant (highlighted by light blue stripe). ATAC-seq and  
395 SCENT tracks represent aggregated ATAC-seq tracks (top) and SCENT peaks (bottom with  
396 grey stripes) in each cell type (public PBMC dataset for immune cell types and arthritis-tissue  
397 dataset for fibroblast). An arrow head indicates the SCENT peak overlapping with fine-mapped  
398 variant. **b.** Rs35944082 for RA and T1D was prioritized and connected to *RBPJ* by long-range  
399 interaction from T-cell- and fibroblast- SCENT enhancer-gene map using inflamed synovium in  
400 arthritis-tissue dataset. The top two panels are GWAS regional plots similarly to panel **a**. ATAC-  
401 seq and SCENT tracks are shown similarly to panel **a**, but using both public PBMC and arthritis-  
402 tissue datasets. **c.** Rs11031006 was prioritized and connected to *FSHB* for multiple  
403 gynecological traits by using pituitary-derived single-cell multimodal dataset. The top four panels  
404 are GWAS regional plots similarly to panel **a**. ATAC-seq and SCENT tracks are shown similarly  
405 to panel **a**, and include tracks from pituitary dataset. There were no SCENT peaks in cell types  
406 except for pituitary. **d.** ATAC-seq and SCENT tracks for *IL10RA* locus, where non-coding ClinVar  
407 variants (grey dots) colocalized with T-cell SCENT track. **e.** ATAC-seq and SCENT tracks for  
408 *CXCR4* locus, where somatic mutation hotspot for leukemia colocalized with T-cell and myeloid-  
409 cell SCENT tracks.

410 Another locus for RA and T1D at 4p15.2 harbored 21 candidate variants, each with low  
411 PIPs ( $< 0.14$ ). SCENT prioritized a single variant rs35944082 in T cells and fibroblasts only within  
412 the arthritis-tissue dataset from inflamed synovial tissue (**Figure 4b**). SCENT linked this variant  
413 to *RBPJ*, which was the 3rd closest gene to this variant located 235kb away. This variant-gene  
414 link was supported by a physical contact from promotor-capture Hi-C data in hematopoietic  
415 cells<sup>82</sup>. *RBPJ* (recombination signal binding protein for immunoglobulin kappa J region) is a  
416 transcription factor critical for NOTCH signaling, which has been implicated in RA tissue  
417 inflammation through functional studies<sup>83,84</sup>. *Rbpj* knockdown in mice resulted in abnormal T cell  
418 differentiation and disrupted regulatory T cell phenotype<sup>85,86</sup>, consistent with a plausible role in  
419 autoimmune diseases. Intriguingly, we observed no SCENT peaks in T cells from PBMC or blood  
420 at this locus. This linkage was not present in EpiMap. ABC map prioritized another variant,  
421 rs7441808 at this locus and linked it non-specifically to 16 genes including *RBPJ*, making it  
422 difficult to define the true causal gene. These results underscored the importance of creating  
423 enhancer-gene links using causal cell types, in this case cells from inflammatory tissues, in the  
424 instances where links exist only in disease-relevant tissues.

425 We highlight another example of SCENT to build enhancer-gene maps from disease-  
426 critical tissues. We examined the enhancer-gene map produced from single-cell pituitary data<sup>62</sup>  
427 to assess 11p14.1 locus for multiple gynecological traits (endometriosis, menorrhagia, ovarian  
428 cyst and age at menopause). Our map connected rs11031006 to *FSHB* (follicle stimulating  
429 hormone subunit beta) (**Figure 4c**), which is specifically expressed in the pituitary<sup>70,87</sup> and  
430 enables ovarian folliculogenesis to the antral follicle stage<sup>88</sup>. Rare genetic variants within *FSHB*



431 cause autosomal recessive hypogonadotropic hypogonadism<sup>89</sup>. However, multimodal data from  
432 other tissues and bulk-based methods (ABC model and EpiMap) were unable to prioritize this  
433 variant, since they missed the most disease-relevant tissue of pituitary.

434

#### 435 *Mendelian-disease variants and somatic mutations in cancer within SCENT enhancers*

436 Having established the SCENT's utility in defining likely causal variants and genes in complex  
437 diseases, we examined rare non-coding variants causing Mendelian diseases. Currently, causal  
438 mutations and genes can only be identified in ~30–40% of patients with Mendelian diseases<sup>90–</sup>  
439 <sup>92</sup>. Consequently, many variants in cases are annotated as variants of uncertain significance  
440 (VUS). The VUS annotation is especially challenging for non-coding variants. We examined the  
441 overlap of clinically reported non-benign non-coding variants by ClinVar<sup>93</sup> (400,300 variants in  
442 total) within SCENT enhancers. The SCENT enhancers harbored 2.0 times ClinVar variants on  
443 average than all the ATAC regions with the same genomic length across all the datasets  
444 (**Supplementary Figure 13**). This density of ClinVar variants was 3.2 times and 12 times on  
445 average larger than that in ENCODE cCREs and of all non-coding regions, respectively. We  
446 defined 3,724 target genes for 33,618 non-coding ClinVar variants by SCENT in total  
447 (**Supplementary Table 5**). As illustrative examples, we found 40 non-coding variants linked to  
448 *LDLR* gene causing familial hypercholesterolemia <sup>193</sup>, 3 non-coding variants linked to *IL10RA*  
449 causing autosomal recessive early-onset inflammatory bowel disease 28 (**Figure 4d**)<sup>94</sup>, and an  
450 intronic variant rs1591491477 linked to *ATM* gene causing hereditary cancer-predisposing  
451 syndrome<sup>93</sup>.

452 Finally, we used SCENT to connect non-coding somatic mutation hotspots to target genes.  
453 Recently, somatic mutation analyses across the entire cancer genome revealed possible driver  
454 non-coding events<sup>95</sup>. Among 372 non-coding mutation hotspots in 19 cancer types, SCENT  
455 enhancers included 193 cancer-mutation hotspot pairs (**Supplementary Table 6**). SCENT  
456 enhancer-gene linkage successfully linked those hotspots to known driver genes (e.g., *BACH2*,  
457 *BCL6*, *BCR*, *CXCR4* (**Figure 4e**), and *IRF8* in leukemia). In some instances, SCENT nominated  
458 different target genes for these mutation hotspots from those based on ABC model used in the  
459 original study. For example, SCENT connected a somatic mutation hotspot in leukemia at  
460 chr14:105568663-106851785 to *IGHA1* (Immunoglobulin Heavy Constant Alpha 1), which might  
461 be more biologically relevant than *ADAM6* nominated by ABC model. These results implicate  
462 broad applicability of SCENT for annotating all types of human variations in non-coding regions.

463  
464 *Augmenting SCENT enhancer-gene maps with more samples*

465 While the recall for enhancer-gene maps defined by SCENT was lower than that by bulk-tissue-  
466 based methods, this might be a function of current limited sample sizes. We assessed if the  
467 addition of more cells into SCENT leads to the higher recall for enhancer-gene maps while  
468 retaining the precision. By downsampling of our multimodal single cell dataset, we observed that  
469 the number of significant gene-peak pairs increased linearly to the number of cells per cell type  
470 in a given dataset, suggesting that SCENT will be even better powered as the size of sc-  
471 multimodal datasets increases (**Supplementary Figure 14**). We considered the possibility that  
472 enhancer-gene maps with greater numbers of cells might capture spurious associations; if this

473 was the case, we would expect more long-range associations, which are more likely to be false  
474 positives with greater cell numbers. In contrast, shorter-range and longer-range associations  
475 were both equivalently represented as we added cells, suggesting the robustness of our  
476 discovery.

477

478

## 479 **Discussion**

480 In this study, we presented a novel statistical method, SCENT, to create a cell-type-specific  
481 enhancer-gene map from single-cell multimodal data. Single-cell RNA-seq and ATAC-seq are  
482 both sparse and have variable count distributions, which requires non-parametric bootstrapping  
483 to connect chromatin accessibility with gene expression. The SCENT model demonstrated well-  
484 controlled type I error, outperforming commonly used statistical models which showed inflated  
485 statistics. SCENT mapped enhancers that showed strikingly high enrichment for putative causal  
486 variants in eQTLs and GWASs and outperformed previous methods for single-cell multimodal  
487 data (e.g., ArchR<sup>49</sup> and Signac<sup>50</sup>). Despite using substantially lower number of samples (28 from  
488 9 datasets in total), enhancers defined by SCENT had equivalent or even higher enrichment for  
489 putative causal variants than bulk-tissue-based methods with more than 100 samples (e.g.,  
490 EpiMap and ABC model), by modeling single-cell level observations instead of obscuring them  
491 into sample-level association.

492 As potential limitations, first, our enhancer-gene maps had relatively fewer enhancers  
493 (lower recall) compared to other resources (**Figure 2a**). However, downsampling experiments

494 showed a clear linear relationship between the number of cells and the number of significant  
495 SCENT peak-gene links. It follows that SCENT applied to larger datasets from a diverse set of  
496 tissues will further expand the current enhancer-gene map. In contrast, bulk-tissue-based  
497 enhancer-gene map might have an upper limit of discovery by the number of samples generated  
498 by each consortium (e.g., ENCODE). Second, SCENT focuses on gene *cis*-regulatory  
499 mechanisms to fine-map disease causal alleles, while there could be other causal mechanisms  
500 that explain disease heritability, such as alleles that act through *trans*-regulatory effects, splicing  
501 effects, or post-transcriptional effects<sup>96</sup>.

502 We argue that the real utility of SCENT is that it enables the construction of disease-  
503 tissue-relevant enhancer-gene maps. Multimodal single cell data can be easily obtained from a  
504 wide range of primary human tissues. Since these assays query nuclear material, data can be  
505 obtained without disaggregating tissues and thus can be employed for assays that need intact  
506 cells from tissue. Therefore, it is possible to build relevant tissue-specific enhancer-gene maps  
507 that are necessary to understand the causal mechanisms of common diseases, rare diseases,  
508 and somatic non-coding mutations in cancers. For example, understanding the *FSHB* locus in  
509 gynecological traits specifically required a pituitary map, and *RBPJ* locus in RA specifically  
510 required a synovial tissue map.

511 In summary, our method SCENT is a robust, versatile method to efficiently define causal  
512 variants and genes in human diseases and will fill the gap in the current enhancer-gene map  
513 built from genomic data in bulk tissues.

514

515 **Data Availability**

516 The publicly available datasets were downloaded via Gene Expression Omnibus (accession  
517 codes: GSE140203, GSE156478, GSE178707, GSE193240, GSE178453) or web repository  
518 ([https://www.10xgenomics.com/resources/datasets?query=&page=1&configure%5Bfacets%5D%5B0%5D=chemistryVersionAndThroughput&configure%5Bfacets%5D%5B1%5D=pipeline.version&configure%5BhitsPerPage%5D=500&menu%5Bproducts.name%5D=Single%20Cell%20Multiome%20ATAC%20%2B%20Gene%20Expression,](https://www.10xgenomics.com/resources/datasets?query=&page=1&configure%5Bfacets%5D%5B0%5D=chemistryVersionAndThroughput&configure%5Bfacets%5D%5B1%5D=pipeline.version&configure%5BhitsPerPage%5D=500&menu%5Bproducts.name%5D=Single%20Cell%20Multiome%20ATAC%20%2B%20Gene%20Expression,https://openproblems.bio/neurips_docs/data/dataset/)  
519 [https://openproblems.bio/neurips\\_docs/data/dataset/](https://openproblems.bio/neurips_docs/data/dataset/)). The raw data for arthritis-tissue dataset  
520 (single-cell multimodal RNA/ATAC-seq and single-cell ATAC-seq) will be publicly available  
521 before the acceptance of this manuscript.

525  
526 **Code Availability**

527 The computational scripts related to this manuscript are available at  
528 <https://github.com/immunogenomics/SCENT>.

529  
530 **Methods**

531 *Data and sample in arthritis-tissue dataset*

532 This study was performed in accordance with protocols approved by the Brigham and Women's  
533 Hospital and the Hospital for Special Surgery institutional review boards. Synovial tissue from  
534 patients with RA and OA were collected from synovectomy or arthroplasty procedures followed  
535 by cryopreservation as previously described<sup>97</sup>. RA samples with high levels of lymphocyte

536 infiltration (as scored by a pathologist on histologic sections) were identified as “inflamed” and  
537 used for downstream analysis. Next, cryopreserved synovial tissue fragments were dissociated  
538 by a mechanical and enzymatic digestion<sup>97</sup>, followed by flow sorting to enrich for live synovial  
539 cells. For each tissue sample, the viable cells were isolated and lysed to extract and load  
540 approximately 10,000 nuclei according to manufacturer protocol (10X Genomics). Joint sc-RNA-  
541 and sc-ATAC-seq libraries were prepared using the 10x Genomics Single Cell Multiome ATAC  
542 + Gene Expression kit according to manufacturer’s instructions. Libraries were sequenced with  
543 paired-end 150-bp reads on an Illumina Novaseq to a target depth of 30,000 read pairs per  
544 nuclei both for mRNA and ATAC libraries. Demultiplexed scRNA-seq fastq files were inputted  
545 into the Cell Ranger ARC pipeline (version 2.0.0) from 10x Genomics to generate barcoded  
546 count matrix of gene expression. For ATAC-seq, we trimmed adaptor and primer sequences and  
547 mapped the trimmed reads to the hg38 genome by BWA-MEM with default parameters. To  
548 deduplicate reads from PCR amplification bias within a cell while keeping reads originating from  
549 the same positions but from different cells, we used in-house scripts (manuscript in preparation).

550

#### 551 *Uniform processing of single-cell multimodal datasets*

552 In addition to our arthritis-tissue multimodal dataset, we downloaded all publicly available  
553 multimodal RNA-seq/ATAC-seq datasets from adult human tissues ( $n_{\text{dataset}} = 9$ , as of April 2022).  
554 We processed these downloaded count matrices of gene expression and ATAC data. Briefly,  
555 we applied QC to both the nuclear RNA data and the ATAC data based on RNA counts, ATAC  
556 fragments, nucleosome signal, and TSS enrichment (**Supplementary Table 7**). We only kept

557 cells that had passed QC in both RNA-seq and ATAC-seq. Then to identify open chromatin  
 558 regions (peaks), we used macs2 to call open chromatin peaks using post-QC ATAC-seq data.  
 559 We thus obtained count matrices of gene expression and ATAC peaks with corresponding cell  
 560 barcodes. Gene expression counts were normalized using the NormalizeData function  
 561 (Seurat<sup>98</sup>), scaled using the ScaleData function (Seurat), and batch corrected using Harmony<sup>99</sup>.  
 562 We visualized the cells in two low-dimensional embeddings with UMAP by using 20 batch-  
 563 corrected principal components from these normalized gene expression matrices (**Figure 1c**).  
 564 When original cell labels are provided by the authors, we used those labels to obtain broad cell  
 565 type categories. When they are not available, we performed reference-query mapping by Seurat  
 566 and PBMC reference object to define broad cell type labels. ATAC peak matrix was binarized to  
 567 have 1 if a count is > 0 and 0 otherwise.

568

569 *SCENT method*

570 We defined *cis*-peaks as any peaks whose center is within the window +/-500 kb from a given  
 571 gene body. We modeled the association between peak's binarized accessibility and the target  
 572 gene's expression with Poisson distribution:

573

$$E_i \sim \text{Poisson}(\lambda_i)$$

574

$$\log(\lambda_i) = \beta_0 + \beta_{peak}X_{peak} + \beta_{\%mito}X_{\%mito} + \beta_{nUMI}X_{nUMI} + \beta_{batch}X_{batch} \quad (\text{Equation 1})$$

575

where  $E_i$  is the observed expression count of  $i$ th gene, and  $\lambda_i$  is the expected count under

576

Poisson distribution.  $\beta_{peak}$  indicates the effect of chromatin accessibility of a peak on  $i$  th gene

577

expression.  $\beta_{\%mito}$ ,  $\beta_{nUMI}$ , and  $\beta_{batch}$  each represents the effect of covariates, percentage of

578 mitochondrial reads per cell as a measure of cell quality, the number of UMIs in the cell, and the  
579 batch, respectively. To empirically assess error and significance of  $\beta_{peak}$  for each peak-gene  
580 combination, we used bootstrapping procedures. In brief, we resampled cells with replacement  
581 in each bootstrapping procedure and re-estimated  $\beta'_{peak}$  within those resampled cells. We  
582 repeated this procedure  $N$  times, where we adaptively increased  $N$  (i.e., the total number of  
583 bootstrapping) from at least 100 and up to 50,000, depending on the significance of  $\beta_{peak}$  (as  
584 described next) in each chunk of bootstrapping trials to reduce the computational burden. After  
585  $N$  times of bootstrapping, we assessed the distribution of  $N$   $\beta'_{peak}$ s against null hypothesis  
586 ( $\beta'_{peak} = 0$ ) to derive the significance of  $\beta_{peak}$  (i.e., two-sided bootstrapping-based  $P$  value for  
587 this peak-gene combination by counting the instances where the statistics are equal or more  
588 extreme than the null hypothesis of  $\beta'_{peak} = 0$ ; **Supplementary Figure 2**).

589 To avoid spurious associations from rare ATAC peak and rare gene expression, we QCed  
590 cis-peak-gene pairs we test so that both peak and gene should have been expressed in at least  
591 5% of the cells we analyze. We finally defined a set of significant peak-gene pairs for each cell  
592 type based on bootstrapping-based  $P$  values and FDR correction for multiple testing (Benjamini  
593 & Hochberg correction).

594 When we tested the calibration of statistics from SCENT or other regression strategies  
595 (**Supplementary Figure 1**), we used null dataset where we randomly permuted cell labels in the  
596 ATAC-seq and ran the regression model we tested.

597

598 *ArchR peak2gene and Signac LinkPeaks method*



599 We analyzed arthritis-tissue dataset with ArchR<sup>49</sup> and Signac<sup>50</sup> for single-cell multimodal data,  
300 which both have a function to define peak-gene linkages. In brief, ArchR takes multimodal data  
301 and creates low-overlapping aggregates of single cells based on  $k$ -nearest neighbor graph. Then  
302 it correlates peak accessibility with gene expression by Pearson correlation of aggregated and  
303 log2-normalized peak count and gene count. Signac computes the Pearson correlation  
304 coefficient  $r$  (corSparse function in R) for each gene and for each peak within 500kb of the gene  
305 TSS. Signac then compares the observed correlation coefficient with an expected correlation  
306 coefficient for each peak given the GC content, accessibility, and length of the peak. Signac  
307 defines  $P$  value for each gene-peak links from the  $z$  score based on this comparison. We ran  
308 both methods on arthritis-tissue dataset with default parameters. We output statistics for all  
309 peak-gene pairs we tested without any cut-off for correlation  $r$  or  $P$  values. We used FDR in the  
310 output from ArchR software, or computed FDR using  $P$  values in the output from Signac software  
311 by Benjamini & Hochberg correction. We defined significant peak-gene linkages as those with  
312 FDR < 0.10, and used varying correlation  $r$  to assess the precision and recall in the causal variant  
313 enrichment analysis (see later sections in **Method**).

314

### 315 *Replication across datasets*

316 Since we have the same immune-related cell types across different multimodal datasets, we  
317 evaluated the concordance of enhancer-gene map in a discovery dataset (arthritis-tissue  
318 dataset) when compared with other replication datasets including immune-related cell types  
319 (Public PBMC, NeurIPS, SHARE-seq and NEAT-seq datasets). To this end, we used most

stringent FDR threshold for defining an enhancer-gene map in arthritis-tissue dataset (FDR < 1%). We then used more lenient threshold for defining an enhancer-gene map in replication datasets (FDR < 10%), which is a similar strategy used in assessing replication in GWAS. For each cell type and for each replication dataset, we took the intersection of enhancer-gene links defined as significant in both datasets. We assessed the directional concordance (i.e., concordance of the sign of  $\beta_{peak}$ ) and the Pearson's correlation  $r$  of  $\beta_{peak}$  between the discovery and the replication for these peak-gene pairs. For the largest replication dataset of Public PBMC, we performed the same analysis for enhancer-gene map from ArchR and Signac software.

529

### 530 *Conservation score analysis*

531 To compare the evolutionary conservation across species between our annotated peaks and the  
532 other peaks, we used phastCons<sup>66</sup> score. We downloaded the phastCons score for multiple  
533 alignments of 99 vertebrate genomes from  
534 <https://hgdownload.cse.ucsc.edu/goldenpath/hg19/phastCons100way/>. We lifted them over to  
535 GRCh38 by LiftOver software. We used SCENT results for arthritis-tissue, Public PBMC and  
536 NeurIPS for conservation score analysis as representative datasets with the largest numbers of  
537 cells. Because each gene should have variable functional importance and conservation, we  
538 assessed each gene separately. For each gene, we took (1) an annotation of interest for the  
539 gene and (2) all *cis*-non-coding regions (< 500kb from a gene), and computed the mean  
540 phastCons score of each of two sets of the peaks. As annotations to be tested, we used a. exonic

341 regions of the gene, b. SCENT peaks for the gene, and c. all ATAC peaks in cis-regions from  
 342 the gene (< 500 kb). Then, we took the difference between two mean differences  
 343 (  $\Delta$  phastCons score ), and computed the mean differences across all the genes  
 344 (mean  $\Delta$  phastCons score) as follows.

$$345 \quad \text{mean } \Delta \text{ phastCons score} = \frac{1}{n_{gene}} \sum_{gene} (\overline{phastCons}_{g,in\_annot} - \overline{phastCons}_{g,non-coding})$$

346 By bootstrapping the genes, we calculated the 95% CI of the mean  $\Delta$  phastCons score.  
 347 If this metric is positive, that indicates that the annotated regions are more conserved than non-  
 348 coding regions.

349 We also calculated similar  $\Delta$  phastCons score by comparing the SCENT peaks with  
 350 TSS-distance-matched non-SCENT peaks in each dataset.

$$351 \quad \text{mean } \Delta \text{ phastCons score} \\
 352 \quad = \frac{1}{n_{gene}} \sum_{gene} (\overline{phastCons}_{g,peak\_in\_SCENT} - \overline{phastCons}_{g,peak\_non\_SCENT\_matched})$$

353 By bootstrapping the genes, we again calculated the 95% CI of the mean  $\Delta$  phastCons  
 354 score. If this metric is positive, that indicates that SCENT peaks are more conserved than TSS-  
 355 distance-matched non-SCENT peaks.

356

### 357 *Construction of a set of TSS-matched non-SCENT peaks*

358 To assess the effect of TSS distance when comparing SCENT peaks with non-SCENT peaks,  
 359 we matched each one of the SCENT peak-gene pairs to one non-SCENT peak-gene pair, where  
 360 the peak had the most similar TSS distance to the same gene among all the ATAC peaks in *cis*  
 361 in each of the dataset. We confirmed that the resulting TSS-distance-matched non-SCENT

362 peak-gene pairs demonstrated the similar distributions of TSS distance when compared with the  
363 SCENT peak-gene pairs (**Supplementary Figure 6b**).

364

365 *Gene's constraint and the number of significant SCENT peaks for a gene*

366 We sought to investigate the relationship between the number of significant SCENT peaks for  
367 each gene and the gene's evolutionary constraint. We used pLI and LOEUF as metrics for the  
368 gene's loss-of-function intolerance within human population. We downloaded both pLI and  
369 LOEUF scores from gnomAD browser (<https://gnomad.broadinstitute.org/downloads>). We  
370 inverse-normal transformed the raw number of significant SCENT peaks for each gene, since  
371 the raw number of significant SCENT peaks for each gene is skewed toward zero  
372 (**Supplementary Figure 5a**). We performed linear regression between the normalized number  
373 of significant SCENT peaks and pLI or LOEUF score with accounting for gene length, which  
374 could be potential confounding factor for pLI and LOEUF<sup>67,68</sup>.

375

376 *Validation with CRISPR-Flow FISH results*

377 To validate our SCENT enhancer-gene links, we used published CRISPR-Flow FISH  
378 experiments as potential ground-truth positive enhancer element-gene links and negative  
379 enhancer element-gene links. We downloaded the experimental results from the  
380 **Supplementary Table 5** of original publication<sup>39</sup>. We used "Perturbation Target" as candidate  
381 enhancer elements. We defined 283 positive enhancer element-gene links when they are "TRUE"  
382 for "Regulated" column (i.e., the element-gene pair is significant and the effect size is negative)

383 and 5,472 negative enhancer element-gene links when they are “FALSE” for “Regulated” column.  
384 We lifted them over to GRCh38 and obtained final sets of 278 positive links and 5,470 negative  
385 links.

386 We used two most powered datasets, arthritis-tissue and Public PBMC datasets. For  
387 each dataset, we used “bedtools intersect” to categorize SCENT peak-gene links and non-  
388 SCENT ATAC peak-gene pairs into either CRISPR-positive or CRISPR-negative groups, based  
389 on whether these peaks overlapped with positive or negative CRISPR-Flow FISH links for the  
390 same gene (**Supplementary Table 3**). We finally performed two-sided Fisher’s exact test to  
391 assess the enrichment of CRISPR-positive links within SCENT peak-gene links in each dataset.

392  
393 *Cell-type-specific SCENT tracks and aggregated SCENT tracks*

394 For cell types with more than 5,000 cells across datasets, we concatenated SCENT peak-gene  
395 linkages across all the datasets to create cell-type-specific SCENT tracks. We collected a set of  
396 SCENT peak-gene linkages for the same cell type and used “bedtools merge” function (for each  
397 gene) to obtain a union of SCENT peaks for each gene. Similarly, we created aggregated  
398 SCENT tracks across all the cell types and all datasets. We collected all sets of SCENT peak-  
399 gene linkages and used “bedtools merge” function (for each gene) to obtain a union of SCENT  
700 peaks for each gene across all the cell types and all datasets.

701  
702 *Causal variant enrichment analysis using eQTLs*

703 We defined a causal enrichment for eQTL within SCENT enhancers and other annotations by  
 704 using statistically fine-mapped variant-gene combinations from GTEx. We used publicly  
 705 available statistics analyzed by CAVIAR software<sup>20</sup>, and selected variants with PIP > 0.2 as  
 706 putatively causal (fine-mapped) variants for primary analyses. For the primary enrichment  
 707 analysis, we aggregated fine-mapped variants from all the 49 tissues. For cell-type-specific  
 708 SCENT enrichment analysis (**Supplementary Figure 9d**), we used fine-mapped variants from  
 709 each tissue separately. We intersected these putatively causal variants with our annotation  
 710 (SCENT peaks, ArchR peaks or Signac peaks). We then retained any variants which the linking  
 711 method (SCENT, ArchR, Signac, and Cicero) connected to the same gene as GTEx phenotype  
 712 gene.

$$713 \quad Enrichment_{gene_i} = \frac{\# \text{causal\_var\_in\_annot}_{gene_i} / \sum \text{common\_var\_in\_annot}_{gene_i}}{\# \text{causal\_var}_{gene_i} / \sum \text{common\_var\_in\_cis}_{gene_i}}$$

$$714 \quad Overall\_Enrichment = \frac{1}{n} \sum_{i=1}^n Enrichment_{gene_i}$$

716 For each gene  $i$  (expression phenotype), we divided the number of putatively causal variants  
 717 within an annotation normalized by the number of common variants within an annotation by the  
 718 number of all causal variants for gene  $i$  normalized by the number of all common variants within  
 719 cis-region from for gene  $i$ . To calculate common variants within annotation or within locus, we  
 720 used 1000 Genomes Project genotype. We selected any variants with minor allele frequency >  
 721 1% in European population as a set of common variants to be intersected with each annotation.  
 722 To derive *Overall\_Enrichment* score, we took the mean across all the genes.

723 To have further insights into precision and recall and compare against ArchR peak2gene  
724 and Signac LinkPeaks functions, we varied the threshold for defining a set of significant peak-  
725 gene linkages in each software (i.e., FDR in SCENT {0.50, 0.30, 0.20, 0.10, 0.05, 0.02},  
726 Pearson's correlation  $r$  {any, 0, 0.1, 0.3, 0.5, 0.7} in ArchR, and correlation score {any, 0, 0.05,  
727 0.1, 0.15} in Signac). We used the same myeloid cells in the arthritis-tissue dataset and a set of  
728 eQTL fine-mapped variants in GTEx blood tissue for this benchmark across all three methods.  
729 We then used each set of peak-gene linkages to re-calculate causal variant enrichment  
730 *Overall\_Enrichment* score (**Figure 3b**).

731 We also assessed the impact of PIP threshold in defining a set of statistically fine-mapped  
732 variants on the causal variant enrichment analysis. To do so, we re-defined the set of putative  
733 causal variants with more stringent PIP thresholds (PIP > 0.5 and PIP > 0.7), and re-computed  
734 the calculate causal variant enrichment *Overall\_Enrichment* score.

735

### 736 *Cicero co-accessibility analyses*

737 To benchmark our SCENT using single-cell multimodal ATAC/RNA-seq against a published  
738 method using single-cell unimodal ATAC-seq alone, we ran Cicero<sup>51</sup> for the same dataset of  
739 myeloid cells in the arthritis-tissue dataset as benchmarked in the SCENT, ArchR and Signac.  
740 We only used the peak by cell matrix from the ATAC-seq side of the arthritis-tissue dataset and  
741 ran "run\_cicero" function with default parameters to obtain Cicero co-accessibility scores. We  
742 only retained peak-peak co-accessibility as potential enhancer-gene connection when one of the  
743 co-accessible peaks is a promoter of a gene (defined by the peak's distance to the TSS < 1kb);

744 we treated them as putative enhancer-gene (promoter) linkage. We used the co-accessibility  
745 scores {any, 0, 0.1, 0.3, 0.4, 0.5, 0.7} for assessing the recall-precision tradeoffs as described in  
746 the previous section.

747

#### 748 *Peak-gene linkage using Poisson regression alone*

749 As other benchmarking for assessing the effect of the components of SCENT on the causal  
750 variant enrichment, we also created peak-gene linkage using the Poisson regression but without  
751 non-parametric bootstrapping for the same dataset of myeloid cells in the arthritis-tissue dataset.  
752 We used the nominal  $P$  values for the term  $X_{peak}$  from the Poisson regression (*Equation (1)*) to  
753 perform FDR correction to obtain significant peak-gene pairs using the Poisson regression alone. We  
754 then used the FDR thresholds {0.30, 0.20, 0.10, 0.05, 0.02, 0.01} for assessing the recall-precision  
755 tradeoffs as described in the previous section.

756

#### 757 *GWAS fine-mapping results*

758 We used GWAS fine-mapping results in FinnGen release 6<sup>71</sup> upon registration and publicly  
759 available GWAS fine-mapping results in UK Biobank<sup>72</sup> (<https://www.finucanelab.org/data>). For  
760 FinnGen traits, we downloaded all the fine-mapping results by SuSIE software<sup>22</sup> and  
761 systematically selected any traits with case count > 1,000. We then selected non-coding fine-  
762 mapped loci which did not include any non-synonymous or splicing variants with PIP > 0.5. We  
763 thus analyzed 1,046 traits and 5,753 loci in total after QC. For UK Biobank, we analyzed the  
764 fine-mapping results by SuSIE software for all 94 traits including binary and quantitative traits.



765 Since the genomic coordinates for the UK Biobank fine-mapping results were hg19, we lifted  
 766 them over to GRCh38 by using LiftOver software. We again selected non-coding fine-mapped  
 767 loci which did not include any non-synonymous or splicing variants with PIP > 0.5. We thus  
 768 analyzed 7,274 loci in total after QC.

769 We analyzed three additional autoimmune GWAS fine-mapping results for RA<sup>26</sup>, T1D<sup>80</sup>,  
 770 and IBD<sup>29</sup>, given our special interest in immune-mediated traits. We similarly selected non-  
 771 coding fine-mapped loci which did not include any non-synonymous or splicing variants with PIP  
 772 > 0.5, and lifted the results over to GRCh38 by using LiftOver software. We defined 117 loci for  
 773 RA, 77 loci for T1D and 86 loci for IBD.

774

#### 775 *Causal variant enrichment analysis using GWASs*

776 We defined a causal enrichment for GWAS within SCENT enhancers and other annotations by  
 777 using statistically fine-mapped variants from FinnGen<sup>71</sup> and UK Biobank<sup>72</sup> which we described  
 778 in the previous section. We selected variants with PIP > 0.2 as putatively causal variants for  
 779 primary analyses.

$$780 \quad \text{Enrichment}_{\text{trait}_i} = \frac{\# \text{causal\_var\_in\_annot}_{\text{trait}_i} / \sum \text{common\_var\_in\_annot}_{\text{trait}_i}}{\# \text{causal\_var}_{\text{trait}_i} / \sum \text{common\_var\_across\_loci}_{\text{trait}_i}}$$

781

$$782 \quad \text{Overall\_Enrichment} = \frac{1}{n} \sum_{i=1}^n \text{Enrichment}_{\text{trait}_i}$$

783 For each trait  $i$ , we divided the number of putatively causal variants within an annotation (across  
 784 all loci for trait  $i$ ) normalized by the number of common variants within an annotation by the

785 number of all causal variants for trait  $i$  normalized by the number of all common variants within  
786 all significant loci analyzed for the trait  $i$ . To calculate common variants within annotation or  
787 within locus, we again used 1000 Genomes Project variants with minor allele frequency  $> 1\%$  in  
788 European population. To derive *Overall\_Enrichment* score, we took the mean across all the  
789 traits.

790 For each trait  $i$  and putative causal gene pair, we calculated the distance between the  
791 TSS of the gene and the most likely causal variant which had the largest PIP when multiple  
792 variants were nominated for a single gene by SCENT (**Supplementary Figure 12a**). For each  
793 putative causal gene for the trait  $i$ , we also sorted all the genes based on the distance between  
794 the gene's TSS and the most likely causal variant (from the smallest to the largest). We then  
795 obtained the rank of the putative causal gene from SCENT among the sorted gene list to see  
796 how often the SCENT gene is the closest gene from the most likely causal variant.

797

### 798 *Comparison with bulk-tissue-based regulatory annotation and enhancer-gene maps*

799 We downloaded per-group EpiMap enhancer-gene links from  
300 <https://personal.broadinstitute.org/cboix/epimap/links/pergroup/>. We lifted the genomic  
301 coordinates to GRCh38 by using LiftOver software. When we assessed aggregated EpiMap  
302 enhancer-gene links across all the 31 tissue-groups, we used “bedtools merge” function for each  
303 gene to create a union of all enhancer-gene links (**Figure 3c and d**). For tissue-specific  
304 enrichment analyses, we analyzed the 31 group-specific tracks separately (**Supplementary**  
305 **Figure 10a and 10b**). To benchmark the precision and recall, we used EpiMap correlation scores

306 to define variable sets of enhancer-gene links from EpiMap based on the threshold of EpiMap  
307 correlation score.

308 We downloaded ABC predictions in 131 cell types and tissues from  
309 <ftp://ftp.broadinstitute.org/outgoing/lincRNA/ABC/AllPredictions.AvgHiC.ABC0.015.minus150.F>  
310 <orABCPaperV3.txt.gz>. We lifted the genomic coordinates to GRCh38 by using LiftOver software.  
311 When we assessed aggregated ABC enhancer-gene links across all the groups, we used  
312 “bedtools merge” function for each gene to create a union of all enhancer-gene links across 131  
313 cell types (**Figure 3c and d**). For cell-type-specific analyses, we aggregated cell lines or cell  
314 types to be corresponding with our cell types and analyzed each of these tracks separately (B  
315 cell, T cell, Myeloid cells, and fibroblasts; **Supplementary Figure 10a and 10b**). To benchmark  
316 the precision and recall, we used ABC scores to define variable sets of enhancer-gene links  
317 from ABC model based on the threshold of ABC score.

318 To assess precision and recall and compare against bulk-tissue based methods (i.e.,  
319 EpiMap and ABC model), we used sets of significant peak-gene linkages in each method with  
320 varying thresholds (i.e., FDR in SCENT {0.5, 0.3, 0.2, 0.1, 0.05, 0.02}, EpiMap correlation score  
321 {0, 0.4, 0.8, 0.9} in EpiMap, and ABC score {0, 0.05, 0.1, 0.2} for ABC model). We then used  
322 each set of peak-gene linkages to re-calculate causal variant enrichment for GWAS (**Figure 3d**).

323 We also assessed the impact of PIP threshold in defining a set of statistically fine-mapped  
324 variants on the causal variant enrichment analysis. To do so, we re-defined the set of putative  
325 causal variants with more stringent PIP thresholds (PIP > 0.5 and PIP > 0.7), and re-computed  
326 the calculate causal variant enrichment *Overall\_Enrichment* score.

327

328 *caQTL analysis using scATAC-seq samples with genotype*

329 We generated independent arthritis-tissue dataset with single-cell unimodal ATAC-seq data with  
330 genotype ( $n = 17$ , *manuscript in preparation*) to define chromatin accessibility QTLs (caQTLs).

331 We used two methods, binomial test and RASQUAL. Briefly, we genotyped donors by using  
332 Illumina Multi-Ethnic Genotyping Array. We performed quality control of genotype by sample call  
333 rate  $> 0.99$ , variant call rate  $> 0.99$ , minor allele frequency  $> 0.01$ , and  $P_{\text{HWE}} > 1.0 \times 10^{-6}$ . We  
334 performed haplotype phasing with SHAPEIT2 software<sup>100</sup> and performed whole-genome  
335 imputation by using minimac3 software<sup>101</sup> with a reference panel of 1000 Genomes Project  
336 phase 3<sup>102</sup>. After imputation, we selected variants with imputation  $R_{\text{sq}} > 0.7$  as post-imputation  
337 QC. We next created a merged bam file of ATAC-seq for each donor and each cell type by  
338 aggregating all the reads. Using the imputed genotype for each donor and aggregated bam files  
339 for each donor and cell type, we applied WASP<sup>103</sup> to correct any bias in read mapping toward  
340 reference alleles to accurately quantify allelic imbalance. We thus created a bias-corrected bam  
341 files for each donor and cell type.

342 For binomial tests, we ran ASEReadCounter module in GATK software<sup>104</sup> using the bias-  
343 corrected bam files as input to quantify allelic imbalance in heterozygous sites with read count  
344  $> 4$  within ATAC peak counts. We first performed one-sided binomial tests in each donor, and  
345 meta-analyzed the statistics across donors by Fisher's method if multiple donors shared the  
346 same heterozygous site. For RASQUAL, we created a VCF file containing both genotype dosage  
347 and allelic imbalance from ASEReadCounter. We quantified the read coverage for each peak

348 and for each donor by “bedtools coverage” function. We created a peak by donor matrix with  
349 read coverage. We QCed samples with  $\log(\text{total mapped fragments})$  fewer than mean – 2SD  
350 across samples in each cell type. We QCed peaks so that at least two individuals have any  
351 fragments for the peak. We then ran RASQUAL software with the inter-individual differences in  
352 ATAC peak counts (in a peak by donor matrix) and intra-individual allelic imbalance (in VCF),  
353 with accounting for chromatin accessibility PCs (the first  $N$  components whose explained  
354 variances are greater than those from permutation result), 3 genotype PCs, sample site and sex  
355 as covariates. RASQUAL output chi-squared statistics and  $P$  values. We computed FDR from  
356 these raw  $P$  values by Benjamini & Hochberg correction on local multiple test burden (i.e., the  
357 number of *cis*-SNPs in the region). To correct for genome-wide multiple testing, we ran the  
358 RASQUAL with random permutation, where the relationship between sample labels and the  
359 count matrix was broken. Thus, we derived  $q$  values for each candidate caQTL.

360 We finally intersected these peaks with significant caQTL effect in each significance  
361 threshold with SCENT peaks and assessed causal variants enrichment within these peaks for  
362 GWAS as explained in the previous sections.

363

#### 364 *ClinVar analysis*

365 We downloaded the latest clinically reported variant list registered at ClinVar from  
366 [https://ftp.ncbi.nlm.nih.gov/pub/clinvar/vcf\\_GRCh38/clinvar.vcf.gz](https://ftp.ncbi.nlm.nih.gov/pub/clinvar/vcf_GRCh38/clinvar.vcf.gz). We then screened the  
367 variants to exclude (1) exonic variants and (2) variants categorized as “benign”. We defined the

368 ClinVar variant density as the number of the non-coding and non-benign variants within each  
369 annotation x 1,000 divided by the total length (bp) of each annotation.

370

### 371 *Somatic mutation analysis*

372 We used a list of somatic mutation hotspot in Supplementary Table 2-20 of the original  
373 publication<sup>95</sup>. We lifted the genomic coordinates to GRCh38 by using LifOver software. We then  
374 intersected the non-coding somatic mutation hotspots with our cell-type-specific SCENT peaks.  
375 We compared the intersected elements' target genes by SCENT with the "Annotate\_Gene"  
376 column from the original publication.

377

### 378 *Downsampling experiments*

379 To evaluate the effect of cell numbers on the statistical power in detecting significant SCENT  
380 enhancer-gene linkages, we performed downsampling experiments in fibroblast (the most  
381 abundant cell type in arthritis-tissue dataset,  $n_{\text{cell}} = 9,905$ ). We randomly samples cells ( $n_{\text{cell}} =$   
382 500, 1000, 2500, 5000, and 7500). We then applied SCENT to each of the subset groups of  
383 cells and defined significant peak-gene links with  $\text{FDR} < 10\%$ . We counted the number of  
384 significant peak-gene links in each of the subset groups of cells, and annotated peaks based on  
385 the distance to the TSS to the target gene.

386

## 387 **References**

- 388 1. Welter, D., MacArthur, J., Morales, J., Burdett, T., Hall, P., Junkins, H., Klemm, A.,  
389 Flicek, P., Manolio, T., Hindorff, L., et al. (2014). The NHGRI GWAS Catalog, a curated

- 390 resource of SNP-trait associations. *Nucleic Acids Res* 42, D1001-6.  
391 10.1093/nar/gkt1229.
- 392 2. Visscher, P.M., Wray, N.R., Zhang, Q., Sklar, P., McCarthy, M.I., Brown, M.A., and  
393 Yang, J. (2017). 10 Years of GWAS Discovery: Biology, Function, and Translation. *Am J*  
394 *Hum Genet* 101, 5–22. 10.1016/J.AJHG.2017.06.005.
- 395 3. Buniello, A., MacArthur, J.A.L., Cerezo, M., Harris, L.W., Hayhurst, J., Malangone, C.,  
396 McMahon, A., Morales, J., Mountjoy, E., Sollis, E., et al. (2019). The NHGRI-EBI GWAS  
397 Catalog of published genome-wide association studies, targeted arrays and summary  
398 statistics 2019. *Nucleic Acids Res* 47, D1005–D1012. 10.1093/NAR/GKY1120.
- 399 4. Claussnitzer, M., Cho, J.H., Collins, R., Cox, N.J., Dermitzakis, E.T., Hurles, M.E.,  
900 Kathiresan, S., Kenny, E.E., Lindgren, C.M., MacArthur, D.G., et al. (2020). A brief  
901 history of human disease genetics. *Nature* 2020 577:7789 577, 179–189.  
902 10.1038/s41586-019-1879-7.
- 903 5. Plenge, R.M., Scolnick, E.M., and Altshuler, D. (2013). Validating therapeutic targets  
904 through human genetics. *Nature Reviews Drug Discovery* 2013 12:8 12, 581–594.  
905 10.1038/nrd4051.
- 906 6. Shendure, J., Findlay, G.M., and Snyder, M.W. (2019). Genomic Medicine—Progress,  
907 Pitfalls, and Promise. *Cell* 177, 45–57. 10.1016/J.CELL.2019.02.003.
- 908 7. Schaid, D.J., Chen, W., and Larson, N.B. (2018). From genome-wide associations to  
909 candidate causal variants by statistical fine-mapping. *Nature Reviews Genetics* 2018  
910 19:8 19, 491–504. 10.1038/s41576-018-0016-z.
- 911 8. Maurano, M.T., Humbert, R., Rynes, E., Thurman, R.E., Haugen, E., Wang, H.,  
912 Reynolds, A.P., Sandstrom, R., Qu, H., Brody, J., et al. (2012). Systematic localization of  
913 common disease-associated variation in regulatory DNA. *Science* (1979) 337, 1190–  
914 1195. 10.1126/SCIENCE.1222794/SUPPL\_FILE/MAURANO.SM.PDF.
- 915 9. Edwards, S.L., Beesley, J., French, J.D., and Dunning, M. (2013). Beyond GWASs:  
916 illuminating the dark road from association to function. *Am J Hum Genet* 93, 779–797.  
917 10.1016/J.AJHG.2013.10.012.
- 918 10. Trynka, G., Sandor, C., Han, B., Xu, H., Stranger, B.E., Liu, X.S., and Raychaudhuri, S.  
919 (2013). Chromatin marks identify critical cell types for fine mapping complex trait  
920 variants. *Nat Genet* 45, 124–130. 10.1038/ng.2504.

- 921 11. Sanyal, A., Lajoie, B.R., Jain, G., and Dekker, J. (2012). The long-range interaction  
922 landscape of gene promoters. *Nature* 2012 489:7414 489, 109–113.  
923 10.1038/nature11279.
- 924 12. Smemo, S., Tena, J.J., Kim, K.H., Gamazon, E.R., Sakabe, N.J., Gómez-Marín, C.,  
925 Aneas, I., Credidio, F.L., Sobreira, D.R., Wasserman, N.F., et al. (2014). Obesity-  
926 associated variants within FTO form long-range functional connections with IRX3. *Nature*  
927 2014 507:7492 507, 371–375. 10.1038/nature13138.
- 928 13. Won, H., de La Torre-Ubieta, L., Stein, J.L., Parikshak, N.N., Huang, J., Opland, C.K.,  
929 Gandal, M.J., Sutton, G.J., Hormozdiari, F., Lu, D., et al. (2016). Chromosome  
930 conformation elucidates regulatory relationships in developing human brain. *Nature* 2016  
931 538:7626 538, 523–527. 10.1038/nature19847.
- 932 14. Strober, B.J., Elorbany, R., Rhodes, K., Krishnan, N., Tayeb, K., Battle, A., and Gilad, Y.  
933 (2019). Dynamic genetic regulation of gene expression during cellular differentiation.  
934 *Science* 364, 1287–1290. 10.1126/SCIENCE.AAW0040.
- 935 15. Cuomo, A.S.E., Seaton, D.D., McCarthy, D.J., Martinez, I., Bonder, M.J., Garcia-  
936 Bernardo, J., Amatya, S., Madrigal, P., Isaacson, A., Buettner, F., et al. (2020). Single-  
937 cell RNA-sequencing of differentiating iPS cells reveals dynamic genetic effects on gene  
938 expression. *Nature Communications* 2020 11:1 11, 1–14. 10.1038/s41467-020-14457-z.
- 939 16. Zhernakova, D. v., Deelen, P., Vermaat, M., van Iterson, M., van Galen, M., Arindrarto,  
940 W., Van't Hof, P., Mei, H., van Dijk, F., Westra, H.J., et al. (2017). Identification of  
941 context-dependent expression quantitative trait loci in whole blood. *Nat Genet* 49, 139–  
942 145. 10.1038/NG.3737.
- 943 17. Nathan, A., Asgari, S., Ishigaki, K., Valencia, C., Amariuta, T., Luo, Y., Beynor, J.I.,  
944 Baglaenko, Y., Suliman, S., Price, A.L., et al. (2022). Single-cell eQTL models reveal  
945 dynamic T cell state dependence of disease loci. *Nature* 2022 606:7912 606, 120–128.  
946 10.1038/s41586-022-04713-1.
- 947 18. Wakefield, J. (2007). A Bayesian Measure of the Probability of False Discovery in  
948 Genetic Epidemiology Studies. *Am J Hum Genet* 81, 208. 10.1086/519024.
- 949 19. Maller, J.B., McVean, G., Byrnes, J., Vukcevic, D., Palin, K., Su, Z., Howson, J.M.M.,  
950 Auton, A., Myers, S., Morris, A., et al. (2012). Bayesian refinement of association signals  
951 for 14 loci in 3 common diseases. *Nat Genet* 44, 1294–1301. 10.1038/NG.2435.



- 952 20. Hormozdiari, F., Kostem, E., Kang, E.Y., Pasaniuc, B., and Eskin, E. (2014). Identifying  
953 causal variants at loci with multiple signals of association. *Genetics* 198, 497–508.  
954 10.1534/GENETICS.114.167908.
- 955 21. Benner, C., Spencer, C.C.A., Havulinna, A.S., Salomaa, V., Ripatti, S., and Pirinen, M.  
956 (2016). FINEMAP: efficient variable selection using summary data from genome-wide  
957 association studies. *Bioinformatics* 32, 1493–1501.  
958 10.1093/BIOINFORMATICS/BTW018.
- 959 22. Wang, G., Sarkar, A., Carbonetto, P., and Stephens, M. (2020). A simple new approach  
960 to variable selection in regression, with application to genetic fine mapping. *J R Stat Soc*  
961 *Series B Stat Methodol* 82, 1273–1300. 10.1111/RSSB.12388.
- 962 23. Weissbrod, O., Hormozdiari, F., Benner, C., Cui, R., Ulirsch, J., Gazal, S., Schoech,  
963 A.P., van de Geijn, B., Reshef, Y., Márquez-Luna, C., et al. (2020). Functionally informed  
964 fine-mapping and polygenic localization of complex trait heritability. *Nature Genetics*  
965 2020 52:12 52, 1355–1363. 10.1038/s41588-020-00735-5.
- 966 24. Wojcik, G.L., Graff, M., Nishimura, K.K., Tao, R., Haessler, J., Gignoux, C.R., Highland,  
967 H.M., Patel, Y.M., Sorokin, E.P., Avery, C.L., et al. (2019). Genetic analyses of diverse  
968 populations improves discovery for complex traits. *Nature* 2019 570:7762 570, 514–518.  
969 10.1038/s41586-019-1310-4.
- 970 25. Chen, M.H., Raffield, L.M., Mousas, A., Sakaue, S., Huffman, J.E., Moscati, A., Trivedi,  
971 B., Jiang, T., Akbari, P., Vuckovic, D., et al. (2020). Trans-ethnic and Ancestry-Specific  
972 Blood-Cell Genetics in 746,667 Individuals from 5 Global Populations. *Cell* 182, 1198-  
973 1213.e14. 10.1016/J.CELL.2020.06.045.
- 974 26. Ishigaki, K., Sakaue, S., Terao, C., Luo, Y., Sonehara, K., Yamaguchi, K., Amariuta, T.,  
975 Too, C.L., Laufer, V.A., Scott, I.C., et al. (2021). Trans-ancestry genome-wide  
976 association study identifies novel genetic mechanisms in rheumatoid arthritis. *medRxiv*  
977 12, 2021.12.01.21267132. 10.1101/2021.12.01.21267132.
- 978 27. Kichaev, G., and Pasaniuc, B. (2015). Leveraging Functional-Annotation Data in Trans-  
979 ethnic Fine-Mapping Studies. *Am J Hum Genet* 97, 260–271.  
980 10.1016/J.AJHG.2015.06.007.
- 981 28. Kanai, M., Ulirsch, J.C., Karjalainen, J., Kurki, M., Karczewski, K.J., Fauman, E., Wang,  
982 Q.S., Jacobs, H., Aguet, F., Ardlie, K.G., et al. (2021). Insights from complex trait fine-

- 383 mapping across diverse populations. medRxiv, 2021.09.03.21262975.  
384 10.1101/2021.09.03.21262975.
- 385 29. Huang, H., Fang, M., Jostins, L., Umićević Mirkov, M., Boucher, G., Anderson, C.A.,  
386 Andersen, V., Cleyneen, I., Cortes, A., Crins, F., et al. (2017). Fine-mapping inflammatory  
387 bowel disease loci to single-variant resolution. *Nature* 547, 173–178.  
388 10.1038/NATURE22969.
- 389 30. Farh, K.K.H., Marson, A., Zhu, J., Kleinewietfeld, M., Housley, W.J., Beik, S., Shoresh,  
390 N., Whitton, H., Ryan, R.J.H., Shishkin, A.A., et al. (2014). Genetic and epigenetic fine  
391 mapping of causal autoimmune disease variants. *Nature* 2014 518:7539 518, 337–343.  
392 10.1038/nature13835.
- 393 31. Mahajan, A., Taliun, D., Thurner, M., Robertson, N.R., Torres, J.M., Rayner, N.W.,  
394 Payne, A.J., Steinthorsdottir, V., Scott, R.A., Grarup, N., et al. (2018). Fine-mapping type  
395 2 diabetes loci to single-variant resolution using high-density imputation and islet-specific  
396 epigenome maps. *Nature Genetics* 2018 50:11 50, 1505–1513. 10.1038/s41588-018-  
397 0241-6.
- 398 32. Kichaev, G., Yang, W.Y., Lindstrom, S., Hormozdiari, F., Eskin, E., Price, A.L., Kraft, P.,  
399 and Pasaniuc, B. (2014). Integrating functional data to prioritize causal variants in  
400 statistical fine-mapping studies. *PLoS Genet* 10. 10.1371/JOURNAL.PGEN.1004722.
- 401 33. Roadmap Epigenomics Consortium, Kundaje, A., Meuleman, W., Ernst, J., Bilenky, M.,  
402 Yen, A., Heravi-Moussavi, A., Kheradpour, P., Zhang, Z., Wang, J., et al. (2015).  
403 Integrative analysis of 111 reference human epigenomes. *Nature* 2015 518:7539 518,  
404 317–330. 10.1038/nature14248.
- 405 34. Chen, L., Ge, B., Casale, F.P., Vasquez, L., Kwan, T., Garrido-Martín, D., Watt, S., Yan,  
406 Y., Kundu, K., Ecker, S., et al. (2016). Genetic Drivers of Epigenetic and Transcriptional  
407 Variation in Human Immune Cells. *Cell* 167, 1398-1414.e24. 10.1016/j.cell.2016.10.026.
- 408 35. Dunham, I., Kundaje, A., Aldred, S.F., Collins, P.J., Davis, C.A., Doyle, F., Epstein, C.B.,  
409 Fritze, S., Harrow, J., Kaul, R., et al. (2012). An integrated encyclopedia of DNA  
410 elements in the human genome. *Nature* 489, 57–74. 10.1038/NATURE11247.
- 411 36. Ernst, J., Kheradpour, P., Mikkelsen, T.S., Shoresh, N., Ward, L.D., Epstein, C.B.,  
412 Zhang, X., Wang, L., Issner, R., Coyne, M., et al. (2011). Mapping and analysis of  
413 chromatin state dynamics in nine human cell types. *Nature* 2011 473:7345 473, 43–49.  
414 10.1038/nature09906.

37. Boix, C.A., James, B.T., Park, Y.P., Meuleman, W., and Kellis, M. (2021). Regulatory genomic circuitry of human disease loci by integrative epigenomics. *Nature* 2021 590:7845 590, 300–307. 10.1038/s41586-020-03145-z.
38. Fulco, C.P., Nasser, J., Jones, T.R., Munson, G., Bergman, D.T., Subramanian, V., Grossman, S.R., Anyoha, R., Doughty, B.R., Patwardhan, T.A., et al. (2019). Activity-by-Contact model of enhancer-promoter regulation from thousands of CRISPR perturbations. *Nat Genet* 51, 1664. 10.1038/S41588-019-0538-0.
39. Nasser, J., Bergman, D.T., Fulco, C.P., Guckelberger, P., Doughty, B.R., Patwardhan, T.A., Jones, T.R., Nguyen, T.H., Ulirsch, J.C., Lekschas, F., et al. (2021). Genome-wide enhancer maps link risk variants to disease genes. *Nature* 2021 593:7858 593, 238–243. 10.1038/s41586-021-03446-x.
40. Gazal, S., Weissbrod, O., Hormozdiari, F., Dey, K.K., Nasser, J., Jagadeesh, K.A., Weiner, D.J., Shi, H., Fulco, C.P., O'Connor, L.J., et al. (2022). Combining SNP-to-gene linking strategies to identify disease genes and assess disease omnigenicity. *Nat Genet* 54, 827–836. 10.1038/S41588-022-01087-Y.
41. Pickar-Oliver, A., and Gersbach, C.A. (2019). The next generation of CRISPR–Cas technologies and applications. *Nature Reviews Molecular Cell Biology* 20:8 20, 490–507. 10.1038/s41580-019-0131-5.
42. Anzalone, A. v., Koblan, L.W., and Liu, D.R. (2020). Genome editing with CRISPR–Cas nucleases, base editors, transposases and prime editors. *Nature Biotechnology* 2020 38:7 38, 824–844. 10.1038/s41587-020-0561-9.
43. Baglaenko, Y., Macfarlane, D., Marson, A., Nigrovic, P.A., and Raychaudhuri, S. (2021). Genome editing to define the function of risk loci and variants in rheumatic disease. *Nature Reviews Rheumatology* 2021 17:8 17, 462–474. 10.1038/s41584-021-00637-8.
44. Cao, J., Cusanovich, D.A., Ramani, V., Aghamirzaie, D., Pliner, H.A., Hill, A.J., Daza, R.M., McFaline-Figueroa, J.L., Packer, J.S., Christiansen, L., et al. (2018). Joint profiling of chromatin accessibility and gene expression in thousands of single cells. *Science* (1979) 361, 1380–1385. 10.1126/SCIENCE.AAU0730/SUPPL\_FILE/AAU0730\_TABLESS1\_S13.XLSX.
45. Chen, S., Lake, B.B., and Zhang, K. (2019). High-throughput sequencing of the transcriptome and chromatin accessibility in the same cell. *Nature Biotechnology* 2019 37:12 37, 1452–1457. 10.1038/s41587-019-0290-0.

- 047 46. Ma, S., Zhang, B., LaFave, L.M., Earl, A.S., Chiang, Z., Hu, Y., Ding, J., Brack, A.,  
048 Kartha, V.K., Tay, T., et al. (2020). Chromatin Potential Identified by Shared Single-Cell  
049 Profiling of RNA and Chromatin. *Cell* 183, 1103-1116.e20. 10.1016/J.CELL.2020.09.056.
- 050 47. Allaway, K.C., Gabitto, M.I., Wapinski, O., Saldi, G., Wang, C.Y., Bandler, R.C., Wu,  
051 S.J., Bonneau, R., and Fishell, G. (2021). Genetic and epigenetic coordination of cortical  
052 interneuron development. *Nature* 2021 597:7878 597, 693–697. 10.1038/s41586-021-  
053 03933-1.
- 054 48. Trevino, A.E., Müller, F., Andersen, J., Sundaram, L., Kathiria, A., Shcherbina, A., Farh,  
055 K., Chang, H.Y., Paşca, A.M., Kundaje, A., et al. (2021). Chromatin and gene-regulatory  
056 dynamics of the developing human cerebral cortex at single-cell resolution. *Cell* 184,  
057 5053-5069.e23. 10.1016/J.CELL.2021.07.039.
- 058 49. Granja, J.M., Corces, M.R., Pierce, S.E., Bagdatli, S.T., Choudhry, H., Chang, H.Y., and  
059 Greenleaf, W.J. (2021). ArchR is a scalable software package for integrative single-cell  
060 chromatin accessibility analysis. *Nature Genetics* 2021 53:3 53, 403–411.  
061 10.1038/s41588-021-00790-6.
- 062 50. Stuart, T., Srivastava, A., Madad, S., Lareau, C.A., and Satija, R. (2021). Single-cell  
063 chromatin state analysis with Signac. *Nature Methods* 2021 18:11 18, 1333–1341.  
064 10.1038/s41592-021-01282-5.
- 065 51. Pliner, H.A., Packer, J.S., McFaline-Figueroa, J.L., Cusanovich, D.A., Daza, R.M.,  
066 Aghamirzaie, D., Srivatsan, S., Qiu, X., Jackson, D., Minkina, A., et al. (2018). Cicero  
067 Predicts cis-Regulatory DNA Interactions from Single-Cell Chromatin Accessibility Data.  
068 *Mol Cell* 71, 858-871.e8. 10.1016/J.MOLCEL.2018.06.044.
- 069 52. Efron, B., and Tibshirani, R.J. (1994). An Introduction to the Bootstrap. *An Introduction to*  
070 *the Bootstrap*. 10.1201/9780429246593.
- 071 53. Lähnemann, D., Köster, J., Szczurek, E., McCarthy, D.J., Hicks, S.C., Robinson, M.D.,  
072 Vallejos, C.A., Campbell, K.R., Beerenwinkel, N., Mahfouz, A., et al. (2020). Eleven  
073 grand challenges in single-cell data science. *Genome Biology* 2020 21:1 21, 1–35.  
074 10.1186/S13059-020-1926-6.
- 075 54. Sarkar, A., and Stephens, M. (2021). Separating measurement and expression models  
076 clarifies confusion in single-cell RNA sequencing analysis. *Nature Genetics* 2021 53:6  
077 53, 770–777. 10.1038/s41588-021-00873-4.

- 078 55. Chen, H., Lareau, C., Andreani, T., Vinyard, M.E., Garcia, S.P., Clement, K., Andrade-  
079 Navarro, M.A., Buenrostro, J.D., and Pinello, L. (2019). Assessment of computational  
080 methods for the analysis of single-cell ATAC-seq data. *Genome Biol* 20, 1–25.  
081 10.1186/S13059-019-1854-5/FIGURES/7.
- 082 56. Granja, J.M., Klemm, S., McGinnis, L.M., Kathiria, A.S., Mezger, A., Corces, M.R.,  
083 Parks, B., Gars, E., Liedtke, M., Zheng, G.X.Y., et al. (2019). Single-cell multiomic  
084 analysis identifies regulatory programs in mixed-phenotype acute leukemia. *Nature*  
085 *Biotechnology* 2019 37:12 37, 1458–1465. 10.1038/s41587-019-0332-7.
- 086 57. Townes, F.W., Hicks, S.C., Aryee, M.J., and Irizarry, R.A. (2019). Feature selection and  
087 dimension reduction for single-cell RNA-Seq based on a multinomial model. *Genome*  
088 *Biol* 20, 1–16. 10.1186/S13059-019-1861-6/FIGURES/5.
- 089 58. Luecken, M.D., Burkhardt, D.B., Cannoodt, R., Lance, C., Agrawal, A., Aliee, H., Chen,  
090 A.T., Deconinck, L., Detweiler, A.M., Granados, A., et al. (2021). A sandbox for  
091 prediction and integration of DNA, RNA, and proteins in single cells. *Proceedings of the*  
092 *Neural Information Processing Systems Track on Datasets and Benchmarks 1*.
- 093 59. Mimitou, E.P., Lareau, C.A., Chen, K.Y., Zorzetto-Fernandes, A.L., Hao, Y., Takeshima,  
094 Y., Luo, W., Huang, T.S., Yeung, B.Z., Papalexi, E., et al. (2021). Scalable, multimodal  
095 profiling of chromatin accessibility, gene expression and protein levels in single cells. *Nat*  
096 *Biotechnol* 39, 1246–1258. 10.1038/S41587-021-00927-2.
- 097 60. Chen, A.F., Parks, B., Kathiria, A.S., Ober-Reynolds, B., Goronzy, J.J., and Greenleaf,  
098 W.J. (2022). NEAT-seq: simultaneous profiling of intra-nuclear proteins, chromatin  
099 accessibility and gene expression in single cells. *Nature Methods* 2022 19:5 19, 547–  
100 553. 10.1038/s41592-022-01461-y.
- 101 61. Meijer, M., Agirre, E., Kabbe, M., van Tuijn, C.A., Heskol, A., Zheng, C., Mendanha  
102 Falcão, A., Bartosovic, M., Kirby, L., Calini, D., et al. (2022). Epigenomic priming of  
103 immune genes implicates oligodendroglia in multiple sclerosis susceptibility. *Neuron* 110,  
104 1193-1210.e13. 10.1016/J.NEURON.2021.12.034.
- 105 62. Zhang, Z., Zamojski, M., Smith, G.R., Willis, T.L., Yianni, V., Mendeleev, N., Pincas, H.,  
106 Seenarine, N., Amper, M.A.S., Vasoya, M., et al. (2022). Single nucleus transcriptome  
107 and chromatin accessibility of postmortem human pituitaries reveal diverse stem cell  
108 regulatory mechanisms. *Cell Rep* 38. 10.1016/J.CELREP.2022.110467.

- 109 63. Abascal, F., Acosta, R., Addleman, N.J., Adrian, J., Afzal, V., Aken, B., Akiyama, J.A.,  
110 Jammal, O. al, Amrhein, H., Anderson, S.M., et al. (2020). Expanded encyclopaedias of  
111 DNA elements in the human and mouse genomes. *Nature* 2020 583:7818 583, 699–710.  
112 10.1038/s41586-020-2493-4.
- 113 64. Westra, H.J., and Franke, L. (2014). From genome to function by studying eQTLs.  
114 *Biochim Biophys Acta* 1842, 1896–1902. 10.1016/J.BBADIS.2014.04.024.
- 115 65. Hujoel, M.L.A., Gazal, S., Hormozdiari, F., van de Geijn, B., and Price, A.L. (2019).  
116 Disease Heritability Enrichment of Regulatory Elements Is Concentrated in Elements  
117 with Ancient Sequence Age and Conserved Function across Species. *Am J Hum Genet*  
118 104, 611–624. 10.1016/j.ajhg.2019.02.008.
- 119 66. Siepel, A., Bejerano, G., Pedersen, J.S., Hinrichs, A.S., Hou, M., Rosenbloom, K.,  
120 Clawson, H., Spieth, J., Hillier, L.D.W., Richards, S., et al. (2005). Evolutionarily  
121 conserved elements in vertebrate, insect, worm, and yeast genomes. *Genome Res* 15,  
122 1034–1050. 10.1101/GR.3715005.
- 123 67. Lek, M., Karczewski, K.J., Minikel, E. v., Samocha, K.E., Banks, E., Fennell, T.,  
124 O'Donnell-Luria, A.H., Ware, J.S., Hill, A.J., Cummings, B.B., et al. (2016). Analysis of  
125 protein-coding genetic variation in 60,706 humans. *Nature* 536, 285–291.  
126 10.1038/nature19057.
- 127 68. Karczewski, K.J., Francioli, L.C., Tiao, G., Cummings, B.B., Alföldi, J., Wang, Q., Collins,  
128 R.L., Laricchia, K.M., Ganna, A., Birnbaum, D.P., et al. (2020). The mutational constraint  
129 spectrum quantified from variation in 141,456 humans. *Nature* 581, 434–443.  
130 10.1038/s41586-020-2308-7.
- 131 69. Wang, X., and Goldstein, D.B. (2020). Enhancer Domains Predict Gene Pathogenicity  
132 and Inform Gene Discovery in Complex Disease. *The American Journal of Human*  
133 *Genetics* 106, 215–233. 10.1016/J.AJHG.2020.01.012.
- 134 70. Aguet, F., Barbeira, A.N., Bonazzola, R., Brown, A., Castel, S.E., Jo, B., Kasela, S., Kim-  
135 Hellmuth, S., Liang, Y., Oliva, M., et al. (2020). The GTEx Consortium atlas of genetic  
136 regulatory effects across human tissues. *Science* 369, 1318.  
137 10.1126/SCIENCE.AAZ1776.
- 138 71. Kurki, M.I., Karjalainen, J., Palta, P., Sipilä, T.P., Kristiansson, K., Donner, K., Reeve,  
139 M.P., Laivuori, H., Aavikko, M., Kaunisto, M.A., et al. (2022). FinnGen: Unique genetic

- 140 insights from combining isolated population and national health register data. medRxiv,  
141 2022.03.03.22271360. 10.1101/2022.03.03.22271360.
- 142 72. Bycroft, C., Freeman, C., Petkova, D., Band, G., Elliott, L.T., Sharp, K., Motyer, A.,  
143 Vukcevic, D., Delaneau, O., O'Connell, J., et al. (2018). The UK Biobank resource with  
144 deep phenotyping and genomic data. *Nature* 562, 203–209. 10.1038/s41586-018-0579-  
145 z.
- 146 73. Dey, K.K., Gazal, S., van de Geijn, B., Kim, S.S., Nasser, J., Engreitz, J.M.,  
147 Correspondence, A.L.P., and Price, A.L. (2022). SNP-to-gene linking strategies reveal  
148 contributions of enhancer-related and candidate master-regulator genes to autoimmune  
149 disease. *Cell Genomics* 2, 100145. 10.1016/j.xgen.2022.100145.
- 150 74. Freund, M.K., Burch, K.S., Shi, H., Mancuso, N., Kichaev, G., Garske, K.M., Pan, D.Z.,  
151 Miao, Z., Mohlke, K.L., Laakso, M., et al. (2018). Phenotype-Specific Enrichment of  
152 Mendelian Disorder Genes near GWAS Regions across 62 Complex Traits. *The*  
153 *American Journal of Human Genetics* 103, 535–552. 10.1016/J.AJHG.2018.08.017.
- 154 75. Gate, R.E., Cheng, C.S., Aiden, A.P., Siba, A., Tabaka, M., Lituiev, D., Machol, I.,  
155 Gordon, M.G., Subramaniam, M., Shamim, M., et al. (2018). Genetic determinants of co-  
156 accessible chromatin regions in activated T cells across humans. *Nature Genetics* 2018  
157 50:8 50, 1140–1150. 10.1038/s41588-018-0156-2.
- 158 76. Khetan, S., Kursawe, R., Youn, A., Lawlor, N., Jillette, A., Marquez, E.J., Ucar, D., and  
159 Stitzel, M.L. (2018). Type 2 Diabetes-Associated Genetic Variants Regulate Chromatin  
160 Accessibility in Human Islets. *Diabetes* 67, 2466–2477. 10.2337/DB18-0393.
- 161 77. Alasoo, K., Rodrigues, J., Mukhopadhyay, S., Knights, A.J., Mann, A.L., Kundu, K., Hale,  
162 C., Dougan, G., and Gaffney, D.J. (2018). Shared genetic effects on chromatin and gene  
163 expression indicate a role for enhancer priming in immune response. *Nat Genet* 50, 424.  
164 10.1038/S41588-018-0046-7.
- 165 78. Currin, K.W., Erdos, M.R., Narisu, N., Rai, V., Vadlamudi, S., Perrin, H.J., Idol, J.R., Yan,  
166 T., Albanus, R.D.O., Broadaway, K.A., et al. (2021). Genetic effects on liver chromatin  
167 accessibility identify disease regulatory variants. *Am J Hum Genet* 108, 1169–1189.  
168 10.1016/J.AJHG.2021.05.001.
- 169 79. Kumasaka, N., Knights, A.J., and Gaffney, D.J. (2015). Fine-mapping cellular QTLs with  
170 RASQUAL and ATAC-seq. *Nature Genetics* 2015 48:2 48, 206–213. 10.1038/ng.3467.

- 171 80. Chiou, J., Geusz, R.J., Okino, M.L., Han, J.Y., Miller, M., Melton, R., Beebe, E.,  
172 Benaglio, P., Huang, S., Korgaonkar, K., et al. (2021). Interpreting type 1 diabetes risk  
173 with genetics and single-cell epigenomics. *Nature* 2021 594:7863 594, 398–402.  
174 10.1038/s41586-021-03552-w.
- 175 81. Mouri, K., Guo, M.H., de Boer, C.G., Lissner, M.M., Harten, I.A., Newby, G.A., DeBerg,  
176 H.A., Platt, W.F., Gentili, M., Liu, D.R., et al. (2022). Prioritization of autoimmune  
177 disease-associated genetic variants that perturb regulatory element activity in T cells.  
178 *Nature Genetics* 2022 54:5 54, 603–612. 10.1038/s41588-022-01056-5.
- 179 82. Javierre, B.M., Sewitz, S., Cairns, J., Wingett, S.W., Várnai, C., Thiecke, M.J., Freire-  
180 Pritchett, P., Spivakov, M., Fraser, P., Burren, O.S., et al. (2016). Lineage-Specific  
181 Genome Architecture Links Enhancers and Non-coding Disease Variants to Target Gene  
182 Promoters. *Cell* 167, 1369-1384.e19. 10.1016/J.CELL.2016.09.037.
- 183 83. Radtke, F., Fasnacht, N., and MacDonald, H.R. (2010). Notch signaling in the immune  
184 system. *Immunity* 32, 14–27. 10.1016/J.IMMUNI.2010.01.004.
- 185 84. Wei, K., Korsunsky, I., Marshall, J.L., Gao, A., Watts, G.F.M., Major, T., Croft, A.P.,  
186 Watts, J., Blazar, P.E., Lange, J.K., et al. (2020). Notch signalling drives synovial  
187 fibroblast identity and arthritis pathology. *Nature* 582, 259–264. 10.1038/S41586-020-  
188 2222-Z.
- 189 85. Delacher, M., Schmidl, C., Herzig, Y., Breloer, M., Hartmann, W., Brunk, F., Kägebein,  
190 D., Träger, U., Hofer, A.C., Bittner, S., et al. (2019). Rbpj expression in regulatory T cells  
191 is critical for restraining TH2 responses. *Nature Communications* 2019 10:1 10, 1–20.  
192 10.1038/s41467-019-09276-w.
- 193 86. Blake, J.A., Baldarelli, R., Kadin, J.A., Richardson, J.E., Smith, C.L., and Bult, C.J.  
194 (2021). Mouse Genome Database (MGD): Knowledgebase for mouse–human  
195 comparative biology. *Nucleic Acids Res* 49, D981. 10.1093/NAR/GKAA1083.
- 196 87. Uhlén, M., Fagerberg, L., Hallström, B.M., Lindskog, C., Oksvold, P., Mardinoglu, A.,  
197 Sivertsson, Å., Kampf, C., Sjöstedt, E., Asplund, A., et al. (2015). Tissue-based map of  
198 the human proteome. *Science* (1979) 347.  
199 10.1126/SCIENCE.1260419/SUPPL\_FILE/1260419\_UHLEN.SM.PDF.
- 200 88. Hillier, S.G. (2001). Gonadotropic control of ovarian follicular growth and development.  
201 *Mol Cell Endocrinol* 179, 39–46. 10.1016/S0303-7207(01)00469-5.



- 202 89. Rubinstein, W.S., Maglott, D.R., Lee, J.M., Kattman, B.L., Malheiro, A.J., Ovetsky, M.,  
203 Hem, V., Gorelenkov, V., Song, G., Wallin, C., et al. (2013). The NIH genetic testing  
204 registry: a new, centralized database of genetic tests to enable access to comprehensive  
205 information and improve transparency. *Nucleic Acids Res* 41, D925–D935.  
206 10.1093/NAR/GKS1173.
- 207 90. Retterer, K., Juusola, J., Cho, M.T., Vitazka, P., Millan, F., Gibellini, F., Vertino-Bell, A.,  
208 Smaoui, N., Neidich, J., Monaghan, K.G., et al. (2016). Clinical application of whole-  
209 exome sequencing across clinical indications. *Genet Med* 18, 696–704.  
210 10.1038/GIM.2015.148.
- 211 91. Adams, D.R., and Eng, C.M. (2018). Next-Generation Sequencing to Diagnose  
212 Suspected Genetic Disorders. *N Engl J Med* 379, 1353–1362.  
213 10.1056/NEJMRA1711801.
- 214 92. Srivastava, S., Love-Nichols, J.A., Dies, K.A., Ledbetter, D.H., Martin, C.L., Chung,  
215 W.K., Firth, H. v., Frazier, T., Hansen, R.L., Prock, L., et al. (2019). Meta-analysis and  
216 multidisciplinary consensus statement: exome sequencing is a first-tier clinical diagnostic  
217 test for individuals with neurodevelopmental disorders. *Genet Med* 21, 2413–2421.  
218 10.1038/S41436-019-0554-6.
- 219 93. Landrum, M.J., Lee, J.M., Benson, M., Brown, G.R., Chao, C., Chitipiralla, S., Gu, B.,  
220 Hart, J., Hoffman, D., Jang, W., et al. (2018). ClinVar: improving access to variant  
221 interpretations and supporting evidence. *Nucleic Acids Res* 46, D1062–D1067.  
222 10.1093/NAR/GKX1153.
- 223 94. Glocker, E.-O., Kotlarz, D., Boztug, K., Gertz, E.M., Schäffer, A.A., Noyan, F., Perro, M.,  
224 Diestelhorst, J., Allroth, A., Murugan, D., et al. (2009). Inflammatory Bowel Disease and  
225 Mutations Affecting the Interleukin-10 Receptor. *New England Journal of Medicine* 361,  
226 2033–2045.  
227 10.1056/NEJMOA0907206/SUPPL\_FILE/NEJM\_GLOCKER\_2033SA1.PDF.
- 228 95. Dietlein, F., Wang, A.B., Fagre, C., Tang, A., Besselink, N.J.M., Cuppen, E., Li, C.,  
229 Sunyaev, S.R., Neal, J.T., and van Allen, E.M. (2022). Genome-wide analysis of somatic  
230 noncoding mutation patterns in cancer. *Science* (1979) 376.  
231 10.1126/SCIENCE.ABG5601/SUPPL\_FILE/SCIENCE.ABG5601\_MDAR\_REPRODUCIB  
232 ILITY\_CHECKLIST.PDF.

- 233 96. Connally, N., Nazeen, S., Lee, D., Shi, H., Stamatoyannopoulos, J., Chun, S., Cotsapas,  
234 C., Cassa, C.A., and Sunyaev, S. (2022). The missing link between genetic association  
235 and regulatory function. medRxiv, 2021.06.08.21258515.  
236 10.1101/2021.06.08.21258515.
- 237 97. Donlin, L.T., Rao, D.A., Wei, K., Slowikowski, K., McGeachy, M.J., Turner, J.D., Meednu,  
238 N., Mizoguchi, F., Gutierrez-Arcelus, M., Lieb, D.J., et al. (2018). Methods for high-  
239 dimensional analysis of cells dissociated from cryopreserved synovial tissue. *Arthritis*  
240 *Res Ther* 20, 1–15. 10.1186/S13075-018-1631-Y/FIGURES/6.
- 241 98. Stuart, T., Butler, A., Hoffman, P., Hafemeister, C., Papalexi, E., Mauck, W.M., Hao, Y.,  
242 Stoeckius, M., Smibert, P., and Satija, R. (2019). Comprehensive Integration of Single-  
243 Cell Data. *Cell* 177, 1888-1902.e21. 10.1016/J.CELL.2019.05.031.
- 244 99. Korsunsky, I., Millard, N., Fan, J., Slowikowski, K., Zhang, F., Wei, K., Baglaenko, Y.,  
245 Brenner, M., Loh, P. ru, and Raychaudhuri, S. (2019). Fast, sensitive and accurate  
246 integration of single-cell data with Harmony. *Nature Methods* 2019 16:12 16, 1289–1296.  
247 10.1038/s41592-019-0619-0.
- 248 100. Delaneau, O., Marchini, J., and Zagury, J.F. (2012). A linear complexity phasing method  
249 for thousands of genomes. *Nat Methods* 9, 179–181. 10.1038/nmeth.1785.
- 250 101. Das, S., Forer, L., Schönherr, S., Sidore, C., Locke, A.E., Kwong, A., Vrieze, S.I., Chew,  
251 E.Y., Levy, S., McGue, M., et al. (2016). Next-generation genotype imputation service  
252 and methods. *Nature Genetics* 2016 48:10 48, 1284–1287. 10.1038/ng.3656.
- 253 102. Gibbs, R.A., Boerwinkle, E., Doddapaneni, H., Han, Y., Korchina, V., Kovar, C., Lee, S.,  
254 Muzny, D., Reid, J.G., Zhu, Y., et al. (2015). A global reference for human genetic  
255 variation. *Nature* 526, 68–74. 10.1038/nature15393.
- 256 103. van de Geijn, B., Mcvicker, G., Gilad, Y., and Pritchard, J.K. (2015). WASP: allele-  
257 specific software for robust molecular quantitative trait locus discovery. *Nat Methods* 12,  
258 1061–1063. 10.1038/NMETH.3582.
- 259 104. van der Auwera, G., O'Connor, B., and Safari, an O.M.Company. (2020). Genomics in  
260 the Cloud.

261

262

263 **Acknowledgments**

264 We would like to sincerely thank participants of this study who provided tissue samples. We  
265 thank Anika Gupta, Joyce Kang and Kaitlyn Lagattuta for their comments and helpful discussion  
266 on the manuscript. This work is supported in part by funding from the National Institutes of Health  
267 (R01AR063759, U01HG012009, UC2AR081023). S.S. was in part supported by the Uehara  
268 Memorial Foundation and The Osamu Hayaishi Memorial Scholarship. K.Weii is supported by a  
269 Burroughs Wellcome Fund Career Awards for Medical Scientists, a Doris Duke Charitable  
270 Foundation Clinical Scientist Development Award, and a Rheumatology Research Foundation  
271 Innovative Research Award. We would like to thank the Brigham and Women's Hospital Center  
272 for Cellular Profiling Single Cell Multomics Core for experimental design and protocol  
273 optimization.

274

#### 275 **Author Contributions**

276 S.S. and S.R. conceived the work and wrote the manuscript with critical input from co-authors.  
277 S.S. and K. Weinand analyzed the arthritis-tissue dataset and S.S. analyzed publicly available  
278 datasets with help and guidance from K.K.D., K.J., M.K., A.M., A.L.P., and S.R. G.F.M.W., Z.Z.,  
279 M.B.B., L.T.D., and K.Weii provided samples and generated the arthritis-tissue dataset. S.I.  
280 refactored the SCENT software implementation as an R package.

281

#### 282 **Competing Financial Interests**

283 We declare no conflict of interest for this study. S.R. is a founder for Mestag, Inc, a scientific  
284 advisor for Rheos, Janssen, and Pfizer, and serves as a consultant for Sanofi and Abbvie.
